# Supplementary material
Source: PubMed Central journal article supplement (PMC8120597)

Oligonucleotides used for Bacterial and Fungal PCR amplification

---

| Name      | Sequence (5')                                           |
|-----------|---------------------------------------------------------|
| 16S fwd   | TCGTCGGCAGCGTCAGATGTGTATAAGAGACAGCCTACGGGNGGCWGCAG      |
| 16S rev   | GTCTCGTGGGCTCGGAGATGTGTATAAGAGACAGGACTACHVGGGTATCTAATCC |
| ITS fwd 1 | CTTGGTCATTTAGAGGAAGTAA                                  |
| ITS fwd 2 | CTCGGTCATTTAGAGGAAGTAA                                  |
| ITS fwd 3 | CTTGGTCATTTAGAGGAACTAA                                  |
| ITS fwd 4 | CCCGGTCATTTAGAGGAAGTAA                                  |
| ITS fwd 5 | CTAGGCTATTTAGAGGAAGTAA                                  |
| ITS fwd 6 | CTTAGTTATTTAGAGGAAGTAA                                  |
| ITS fwd 7 | CTACGTCATTTAGAGGAAGTAA                                  |
| ITS fwd 8 | CTTGGTCATTTAGAGGTCGTAA                                  |
| ITS rev 1 | GCTGCGTTCTTCATCGATGC                                    |
| ITS rev 2 | GCTGCGTTCTTCATCGATGG                                    |
| ITS rev 3 | GCTACGTTCTTCATCGATGC                                    |
| ITS rev 4 | GCTGCGTTCTTCATCGATGT                                    |
| ITS rev 5 | ACTGTGTTCTTCATCGATGT                                    |
| ITS rev 6 | GCTGCGTTCTTCATCGTTGC                                    |
| ITS rev 7 | GCGTTCTTCATCGATGC                                       |

---

**Table S3. Patient Characteristics (normal pancreas vs. pancreatic cyst)**

|                               | Bacterial analysis |                    |         | Fungal analysis    |                    |         |
|-------------------------------|--------------------|--------------------|---------|--------------------|--------------------|---------|
|                               | Normal pancreas    | Pancreas cyst      | p value | Normal pancreas    | Pancreas cyst      | p value |
| Cases                         | 86                 | 86                 |         | 53                 | 53                 |         |
| Age (years); mean (range)     | 60.0 (34.3 - 79.5) | 62.6 (33.5 - 87.3) | 0.1087  | 66.6 (40.7 - 79.5) | 67.4 (40.2 - 87.3) | 0.5726  |
| Sex                           |                    |                    | 0.7594  |                    |                    | 0.8455  |
| Male (%)                      | 38 (44.2%)         | 40 (46.5%)         |         | 25 (47.2%)         | 24 (45.3%)         |         |
| Female (%)                    | 48 (55.8%)         | 46 (53.5%)         |         | 28 (52.8%)         | 29 (54.7%)         |         |
| Race                          |                    |                    | 0.3868  |                    |                    | 0.7358  |
| White (%)                     | 81 (94.2%)         | 77 (89.5%)         |         | 49 (92.5%)         | 49 (92.5%)         |         |
| Non-white (%)                 | 5 (5.8%)           | 6 (7.0%)           |         | 4 (7.5%)           | 3 (5.6%)           |         |
| Missing (%)                   | 0 (0%)             | 3 (3.5%)           |         | 0 (0%)             | 1 (1.9%)           |         |
| Smoking status                |                    |                    | 0.3759  |                    |                    | 0.5463  |
| Never smoker (%)              | 61 (70.9%)         | 60 (69.8%)         |         | 39 (73.6%)         | 34 (64.2%)         |         |
| Former smoker (%)             | 22 (25.6%)         | 20 (23.2%)         |         | 13 (24.5%)         | 17 (32.0%)         |         |
| Current smoker (%)            | 3 (3.5%)           | 3 (3.5%)           |         | 1 (1.9%)           | 2 (3.8%)           |         |
| Missing (%)                   | 0 (0%)             | 3 (3.5%)           |         | 0 (0%)             | 0 (0%)             |         |
| Alcohol consumption           |                    |                    | 0.1431  |                    |                    | 0.4228  |
| Never or occasional (%)       | 49 (57.0%)         | 53 (61.6%)         |         | 31 (58.5%)         | 35 (66.0%)         |         |
| Regular or heavy (%)          | 37 (43.0%)         | 30 (34.9%)         |         | 22 (41.5%)         | 18 (34.0%)         |         |
| Missing (%)                   | 0 (0%)             | 3 (3.5%)           |         | 0 (0%)             | 0 (0%)             |         |
| Diabetes                      |                    |                    | 0.227   |                    |                    | 0.0641  |
| Yes (%)                       | 8 (9.3%)           | 14 (16.3%)         |         | 6 (11.3%)          | 10 (18.9%)         |         |
| No (%)                        | 78 (90.7%)         | 71 (82.6%)         |         | 47 (88.7%)         | 43 (81.1%)         |         |
| Missing (%)                   | 0 (0%)             | 1 (1.1%)           |         | 0 (0%)             | 0 (0%)             |         |
| PPI use                       |                    |                    | 0.4703  |                    |                    | 1       |
| Regular (%)                   | 22 (25.6%)         | 18 (20.9%)         |         | 10 (18.9%)         | 10 (18.9%)         |         |
| None (%)                      | 64 (74.4%)         | 68 (79.1%)         |         | 43 (81.1%)         | 43 (81.1%)         |         |
| Probiotics                    |                    |                    | 0.5603  |                    |                    | 0.1534  |
| Yes (%)                       | 1 (1.2%)           | 2 (2.3%)           |         | 0 (0%)             | 2 (3.8%)           |         |
| No (%)                        | 85 (98.8%)         | 84 (97.7%)         |         | 53 (100%)          | 51 (96.2%)         |         |
| Antibiotics                   |                    |                    | 0.5603  |                    |                    | 1       |
| Yes (%)                       | 1 (1.2%)           | 2 (2.3%)           |         | 1 (1.9%)           | 1 (1.9%)           |         |
| No (%)                        | 85 (98.8%)         | 84 (97.7%)         |         | 52 (98.1%)         | 52 (98.1%)         |         |
| Cyst location                 |                    |                    |         |                    |                    |         |
| head (%)                      |                    | 33 (38.4%)         |         |                    | 18 (34.0%)         |         |
| body (%)                      |                    | 34 (39.5%)         |         |                    | 24 (45.3%)         |         |
| tail (%)                      |                    | 19 (22.1%)         |         |                    | 11 (20.8%)         |         |
| Cyst size (cm); mean (range)  |                    | 1.24 (0.16-8.0)    |         |                    | 1.14 (0.16-8.0)    |         |
| Number of cysts; mean (range) |                    | 2.2 (1-8)          |         |                    | 2.4 (1-8)          |         |
| Worrisome features            |                    |                    |         |                    |                    |         |
| Yes (%)                       |                    | 8 (9.3%)           |         |                    | 4 (7.5%)           |         |
| MPD dilation                  |                    | 4                  |         |                    | 0                  |         |
| Mural nodule                  |                    | 4                  |         |                    | 4                  |         |
| No (%)                        |                    | 78 (90.7%)         |         |                    | 49 (92.5%)         |         |

Table S2; PPI use and age in normal controls

---

|                                 | non-users        | low dose users   |
|---------------------------------|------------------|------------------|
| <i>for analysis of bacteria</i> |                  |                  |
| Cases                           | 98               | 10               |
| Age (years)                     | 53.8 (20.3-79.5) | 53.0 (34.3-76.4) |
| <i>for analysis of fungal</i>   |                  |                  |
| Cases                           | 31               | 4                |
| Age (years)                     | 57.0 (40.7-79.5) | 58.7 (48.0-76.4) |

---

---

| regular or high dose users | p value |
|----------------------------|---------|
| 19<br>56.8 (38.9-77.3)     | 0.60    |
| 6<br>56.6 (44.2-77.3)      | 0.91    |

---

**Table S4. Tumor microbiome analysis patient Characteristics**

|                           |  | Bacterial and fungal analysis |
|---------------------------|--|-------------------------------|
|                           |  | PDAC                          |
| Cases                     |  | 12                            |
| Age (years); mean (range) |  | 64.4 (47.5 - 80.1)            |
| Sex                       |  |                               |
| Male (%)                  |  | 9 (75%)                       |
| Female (%)                |  | 3 (25%)                       |
| Race                      |  |                               |
| White (%)                 |  | 11 (91.7%)                    |
| Non-white (%)             |  | 1 (8.3%)                      |
| Smoking status            |  |                               |
| Never smoker (%)          |  | 4 (33.3%)                     |
| Former smoker (%)         |  | 8 (66.7%)                     |
| Current smoker (%)        |  | 0 (0%)                        |
| Alcohol consumption       |  |                               |
| Never or occasional (%)   |  | 6 (50%)                       |
| Regular or heavy (%)      |  | 5 (41.7%)                     |
| Missing (%)               |  | 1 (8.3%)                      |
| Diabetes                  |  |                               |
| Yes (%)                   |  | 7 (58.3%)                     |
| No (%)                    |  | 5 (41.7%)                     |
| PPI use                   |  |                               |
| Regular (%)               |  | 3 (25%)                       |
| None (%)                  |  | 9 (75%)                       |
| Probiotics                |  |                               |
| Yes (%)                   |  | 0 (0%)                        |
| No (%)                    |  | 12 (100%)                     |
| Antibiotics               |  |                               |
| Yes (%)                   |  | 2 (16.7%)                     |
| No (%)                    |  | 10 (83.3%)                    |
| Tumor location            |  |                               |
| head (%)                  |  | 9 (75%)                       |
| body (%)                  |  | 3 (25%)                       |
| tail (%)                  |  | 0 (0%)                        |
| Biliary obstruction*      |  | 1 (8.3%)                      |
| Stage                     |  |                               |
| IA (%)                    |  | 0 (0%)                        |
| IB (%)                    |  | 3 (25%)                       |
| IIA (%)                   |  | 2 (16.7%)                     |
| IIB (%)                   |  | 6 (50%)                       |
| III (%)                   |  | 1 (8.3%)                      |
| IV (%)                    |  | 0 (0%)                        |

\* at the time of sampling



A

## Phylum

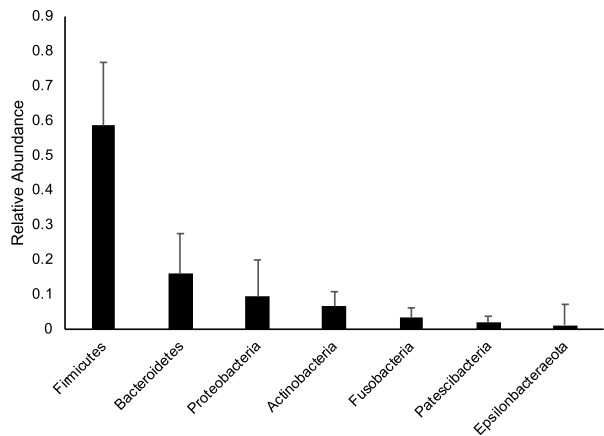

B

## Class

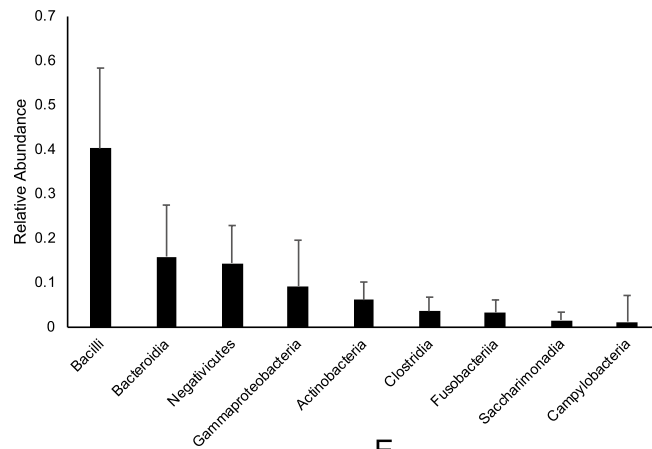

C

## Order

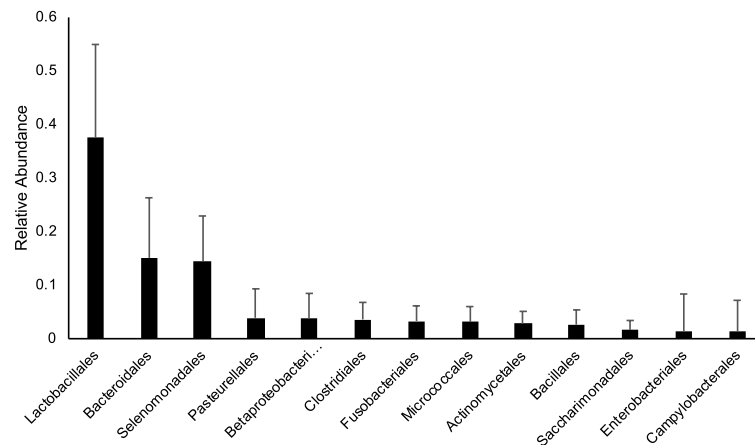

D

## Family

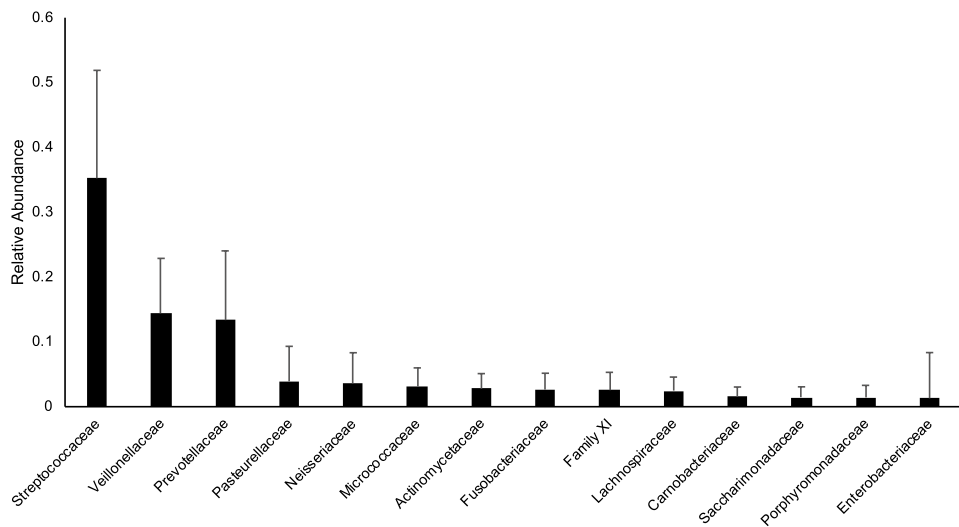

E

## Genus

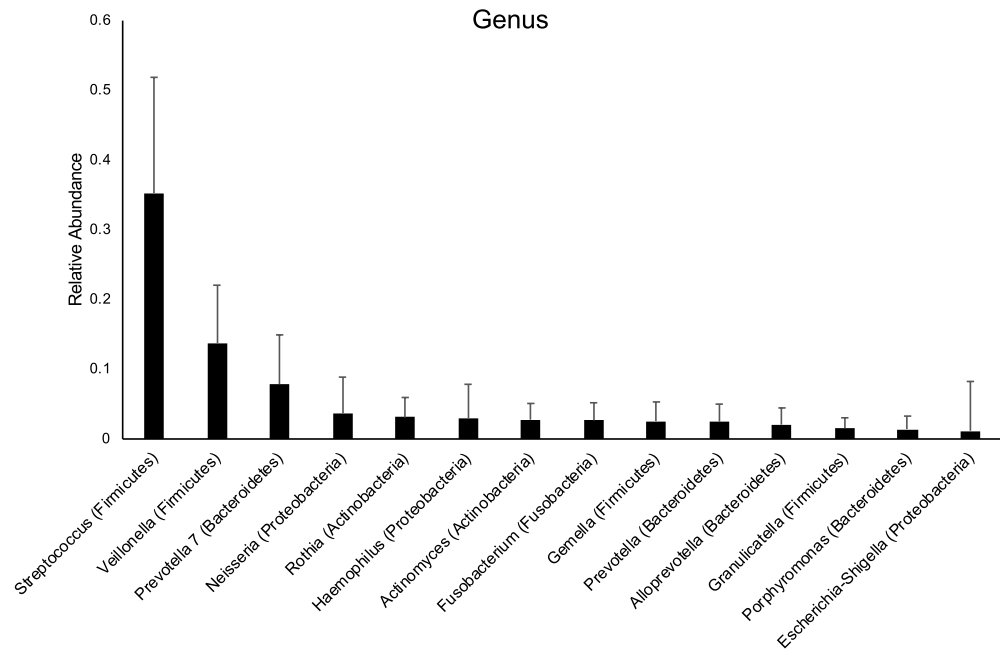

**A** **Observed OTUs**  $P = .001^*$ 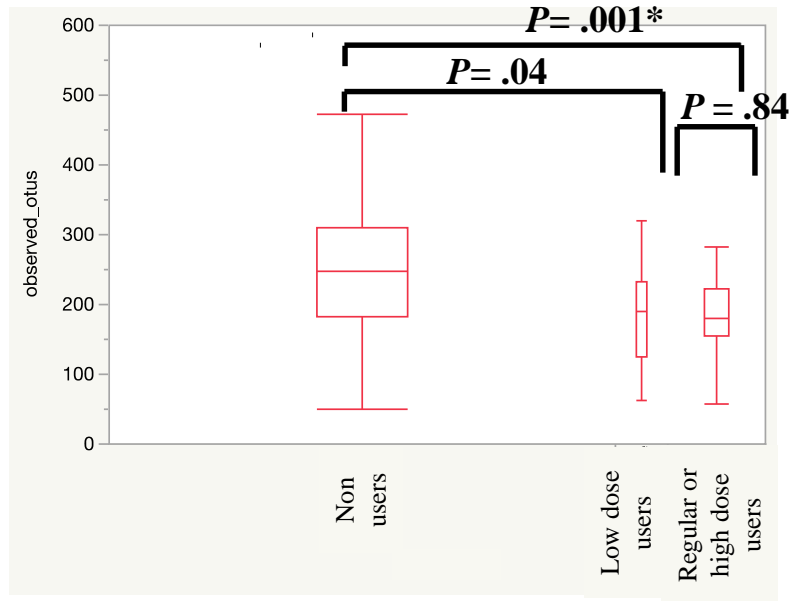**Shannon Index**  $P = .001^*$ 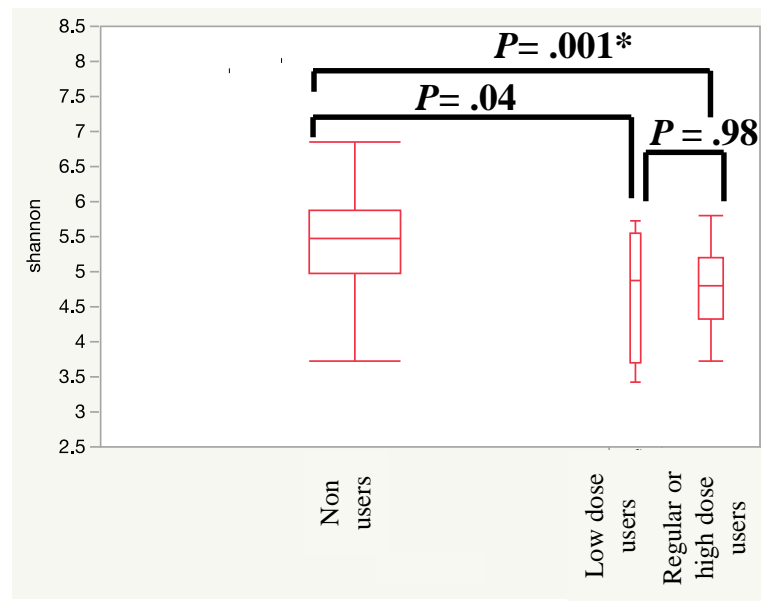**Faith PD**  $P = .06$ 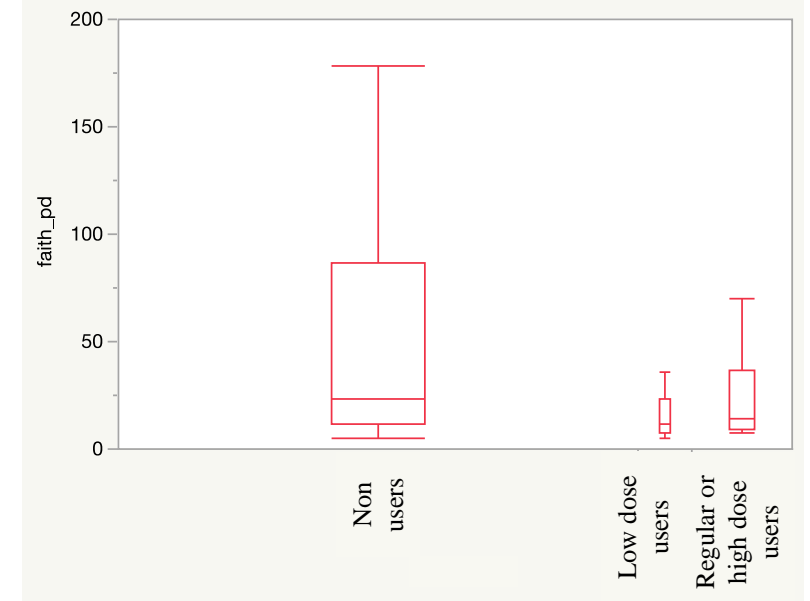**B** **Observed OTUs**  $P = .78$ 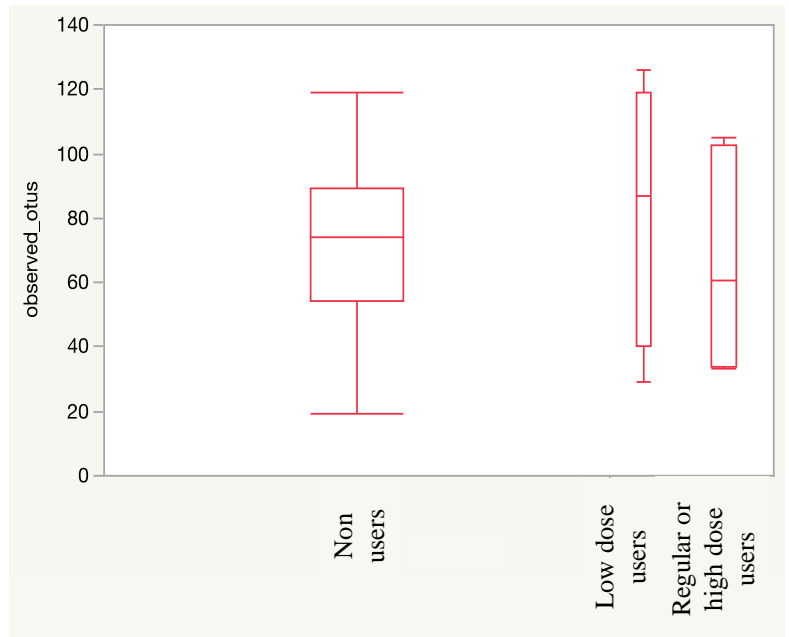**Shannon Index**  $P = .88$ 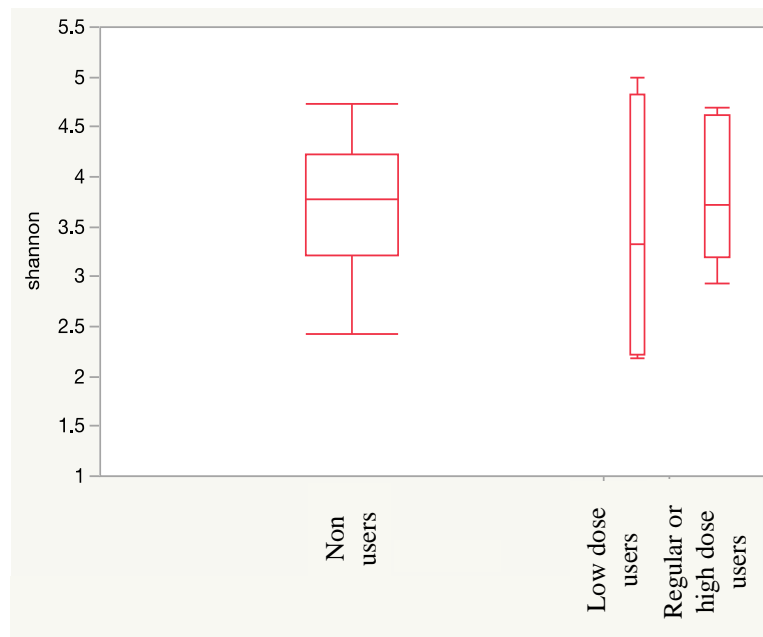**Faith PD**  $P = .83$ 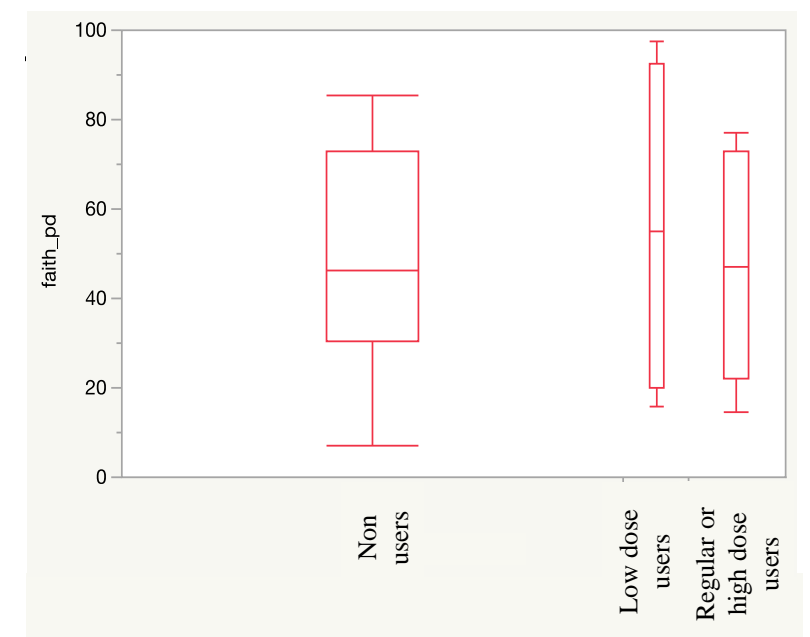



## A

Age

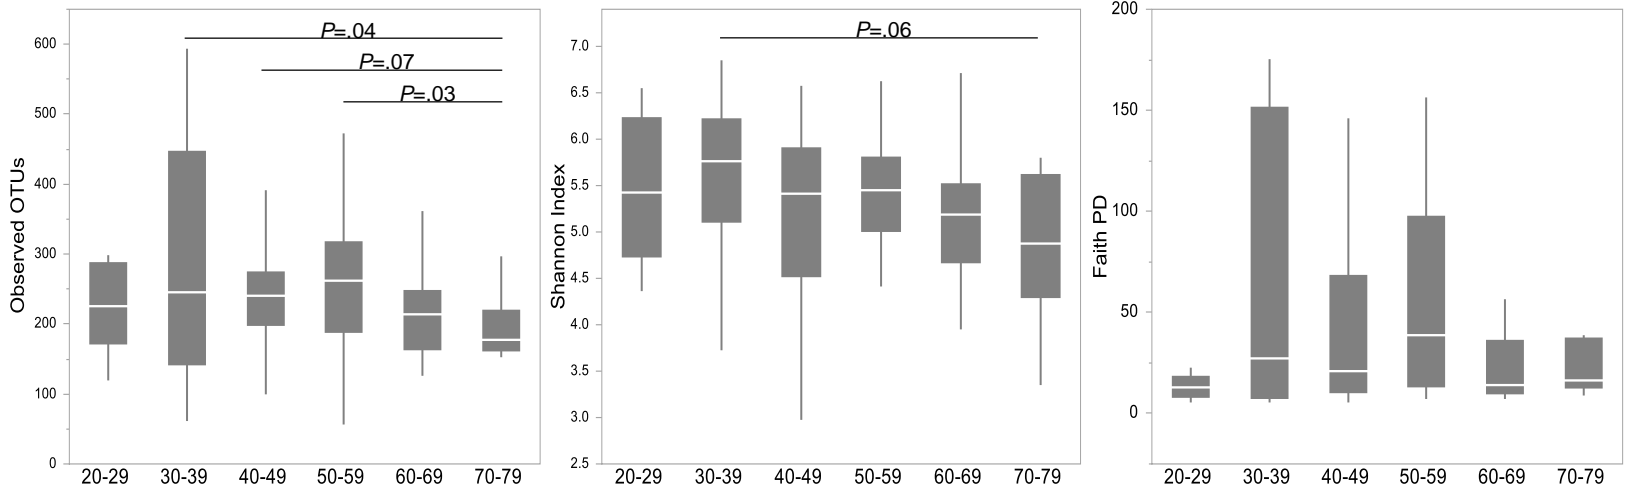

## B

Alcohol

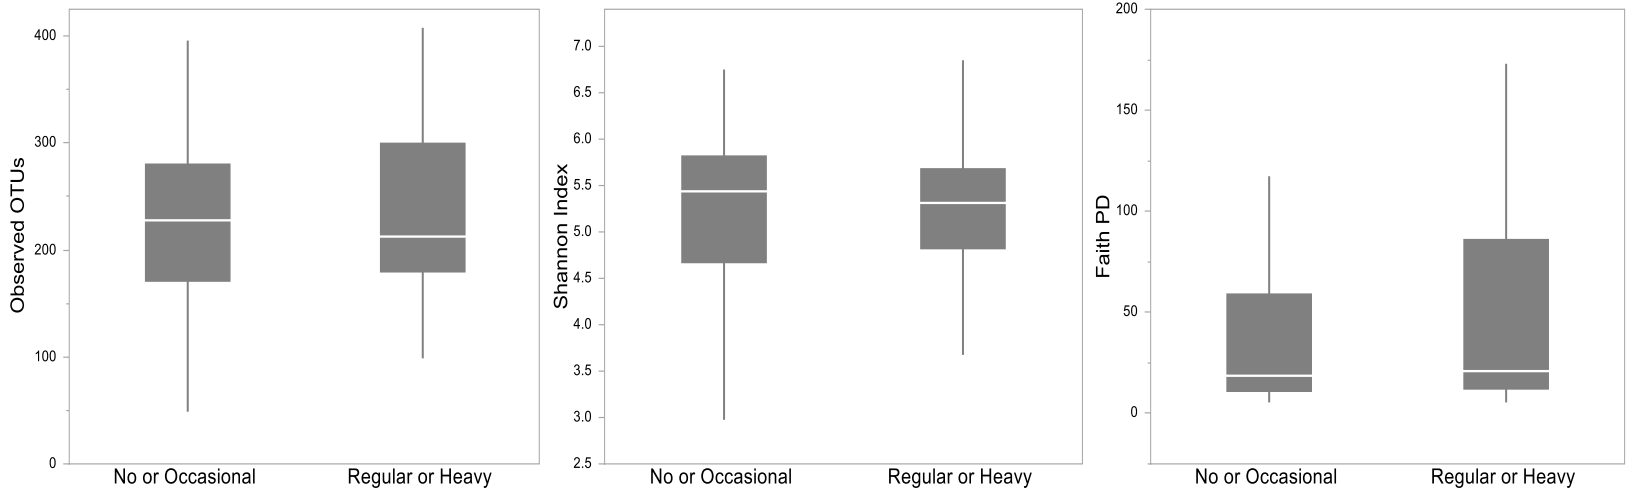

## C

Smoking

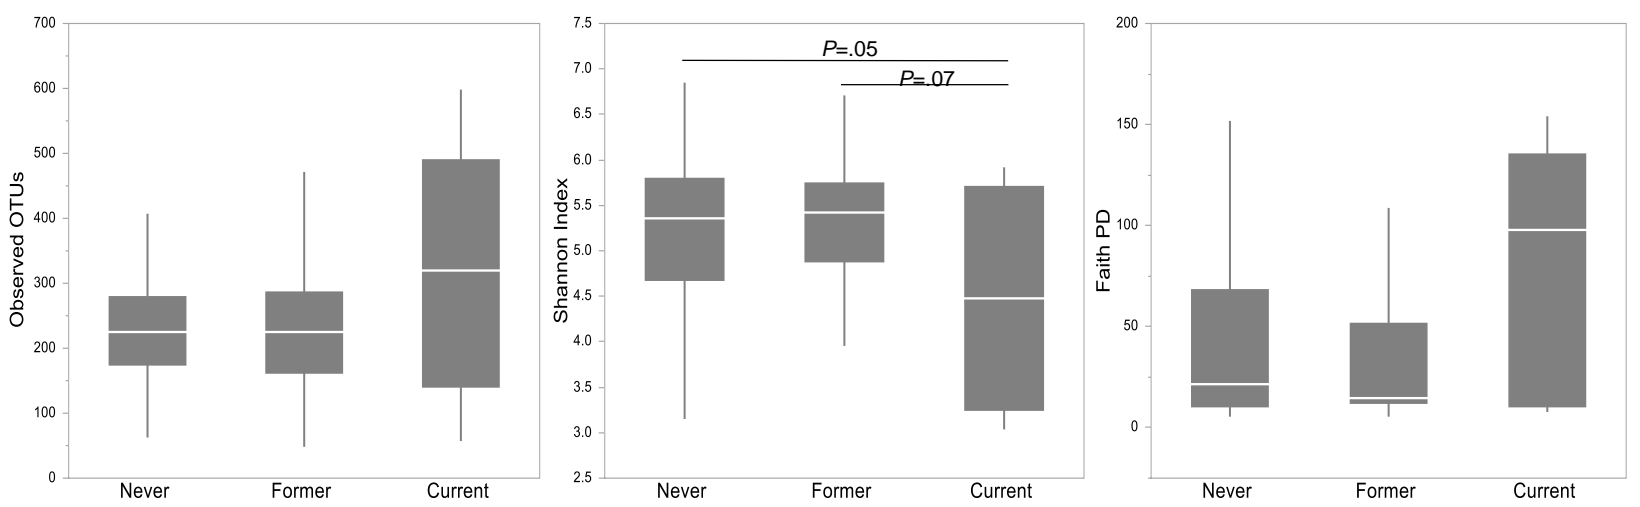

## D

DM

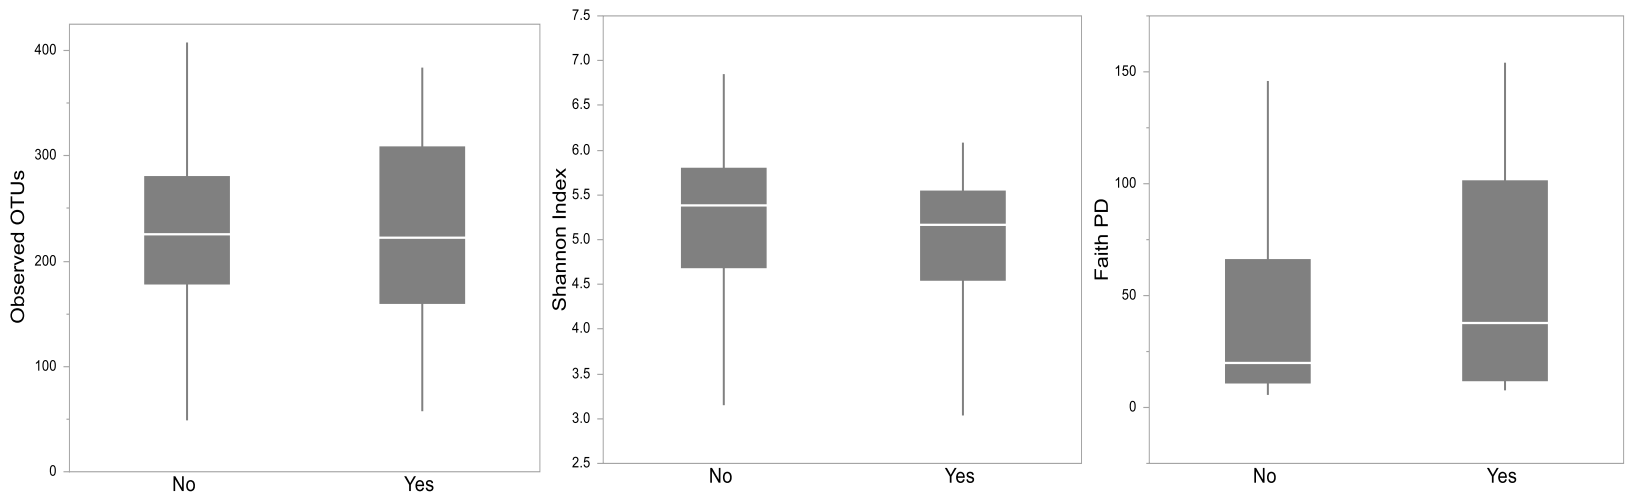

## E

BMI

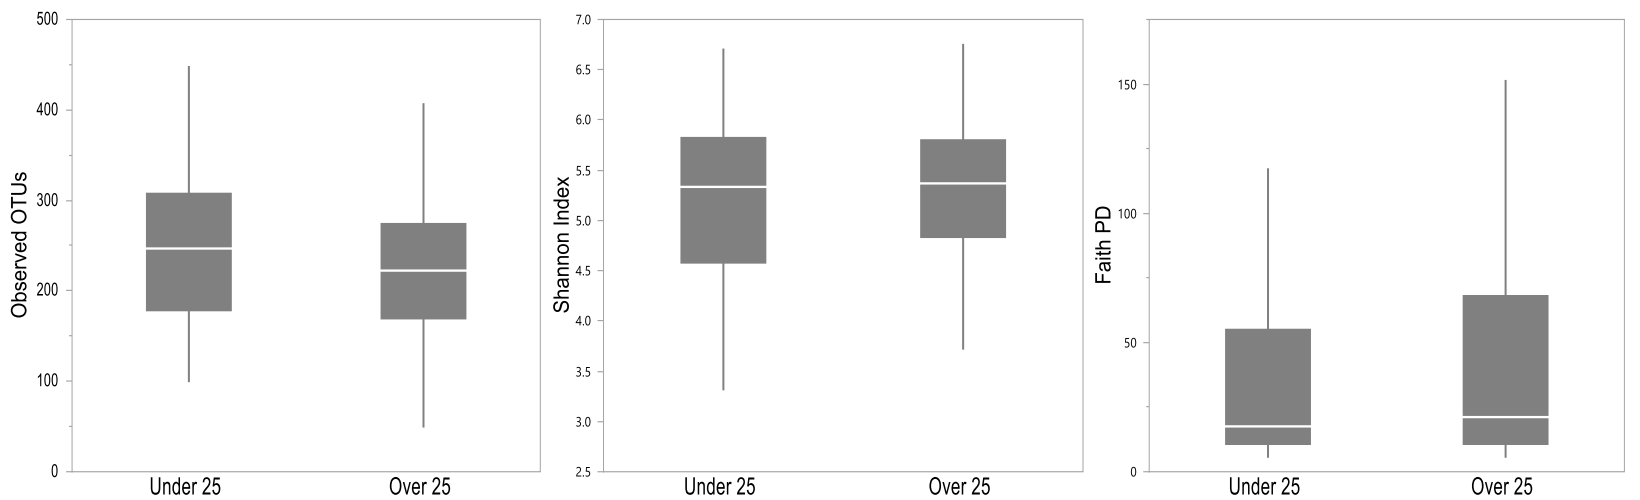

A

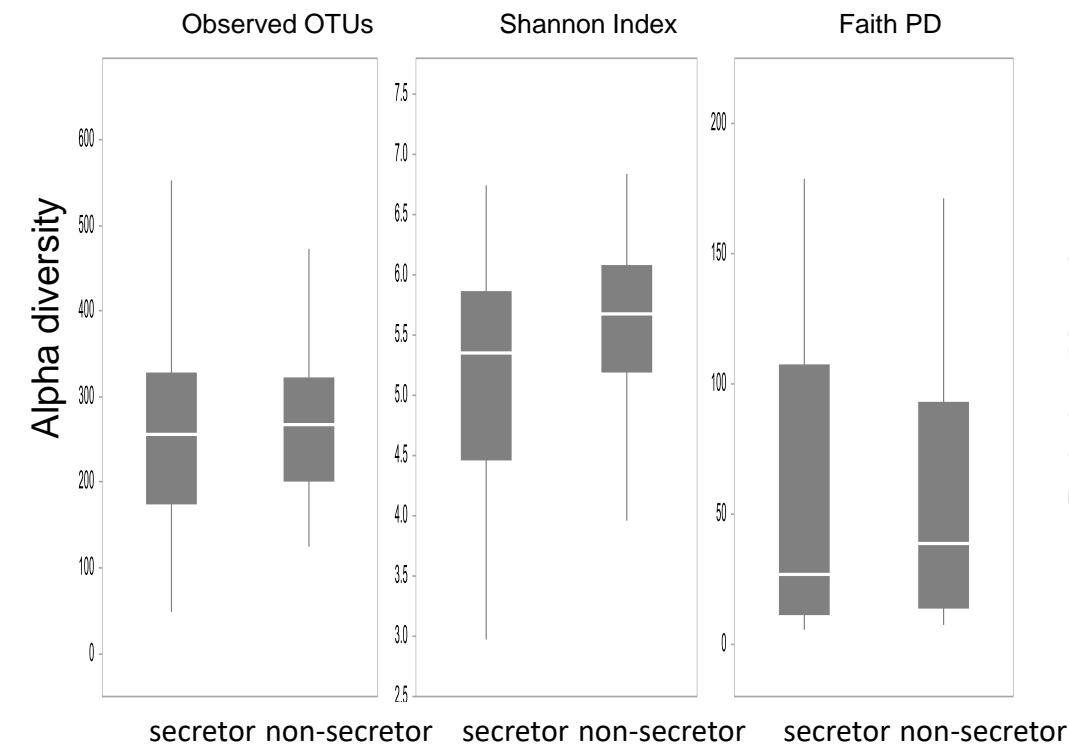

B

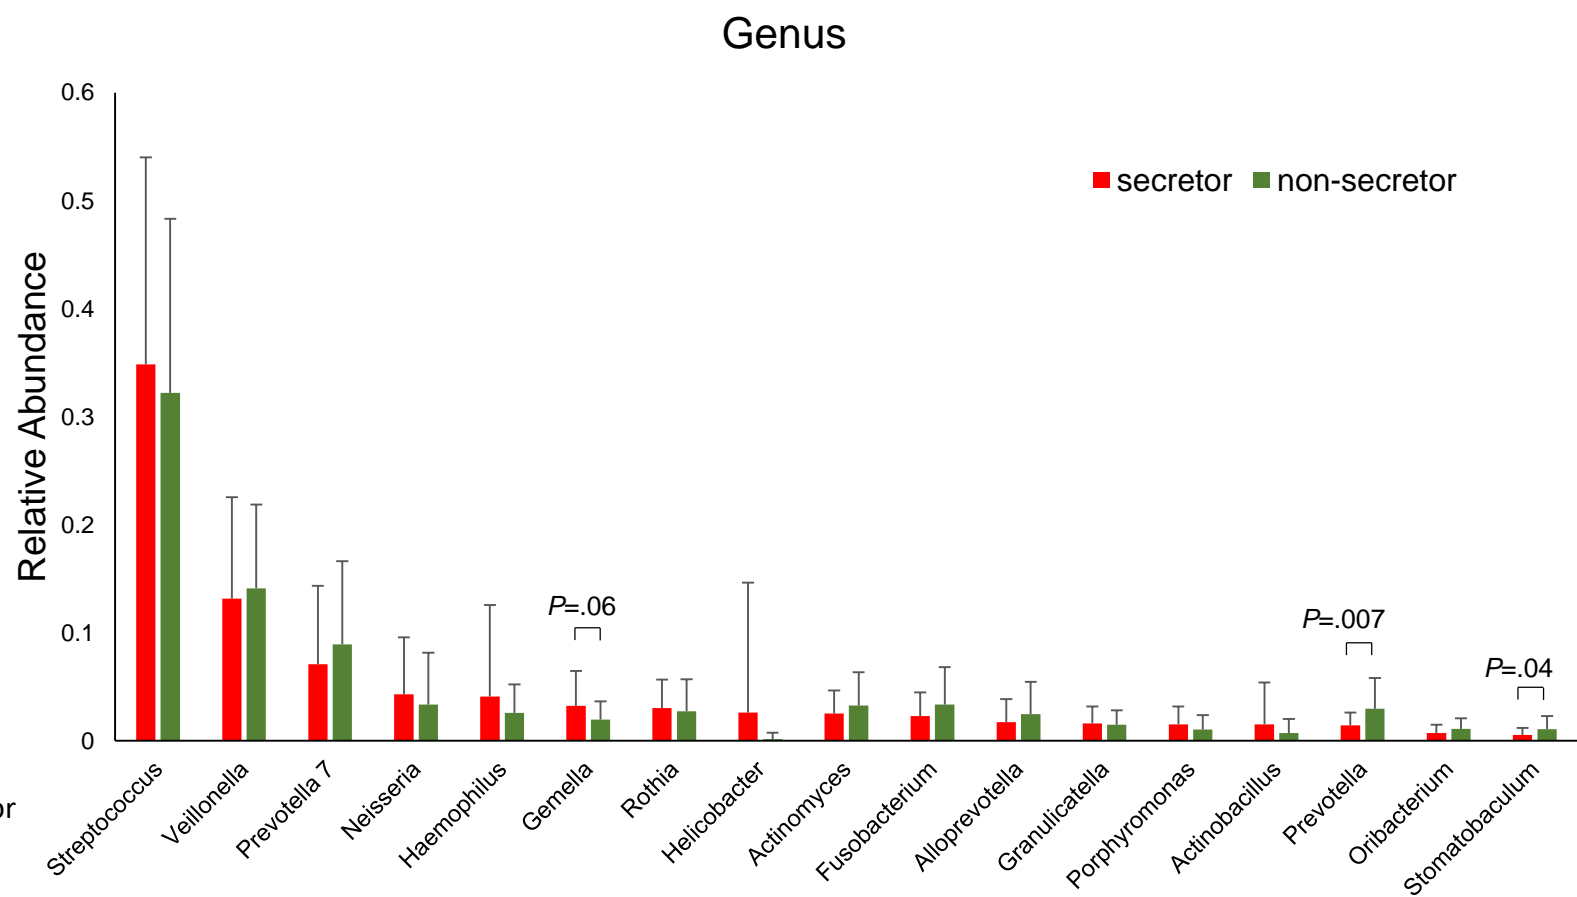

C

secretor  
non-secretor

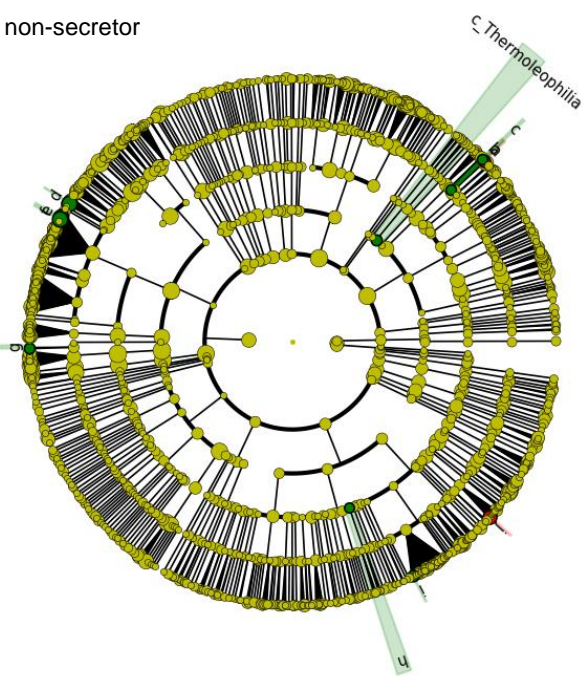

a: g\_Olsenella  
b: g\_Collinsella  
c: f\_Coriobacteriaceae  
d: g\_Eubacterium\_nodatum  
e: g\_Butyrvibrio2  
f: g\_Catonella  
g: g\_Acidaminococcus  
h: o\_Oligoflexales  
i: g\_Acidovorax  
j: g\_Escherichia\_Shigella

secretor non-secretor

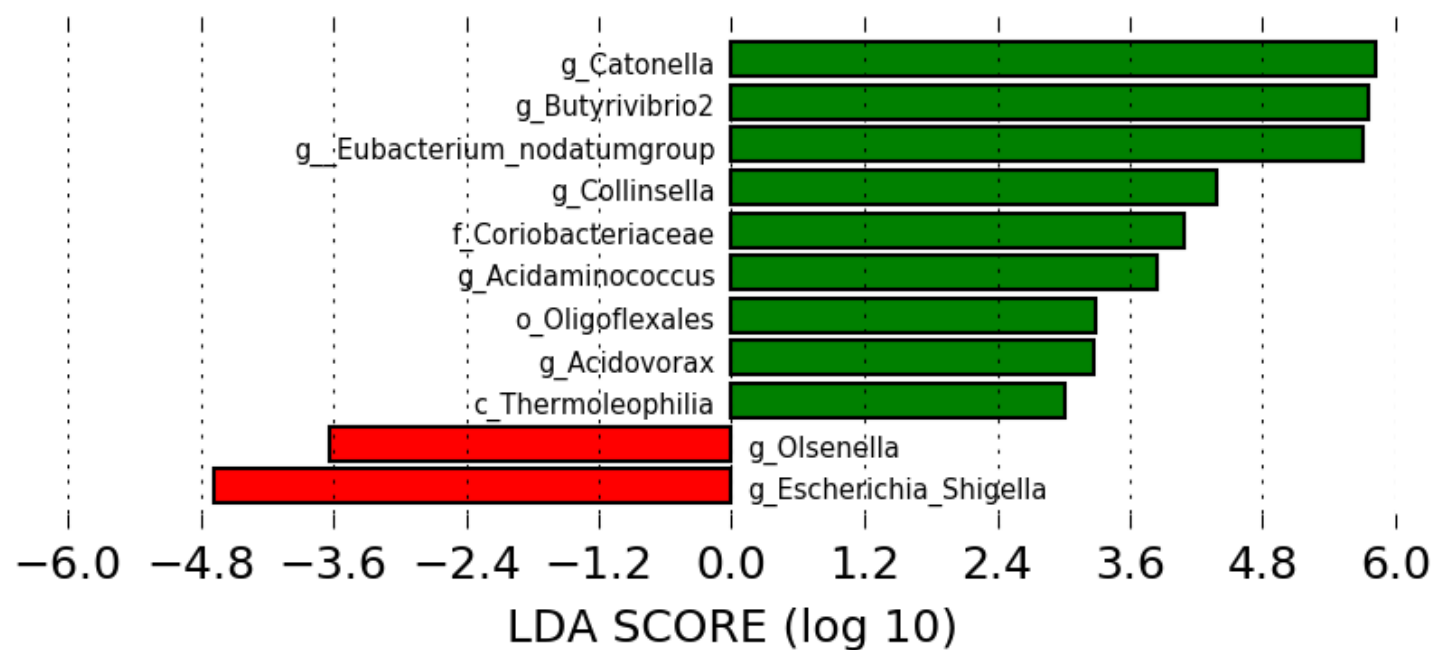

## PPI Non-users: PDAC vs age-matched normal pancreas (n=34 per group)

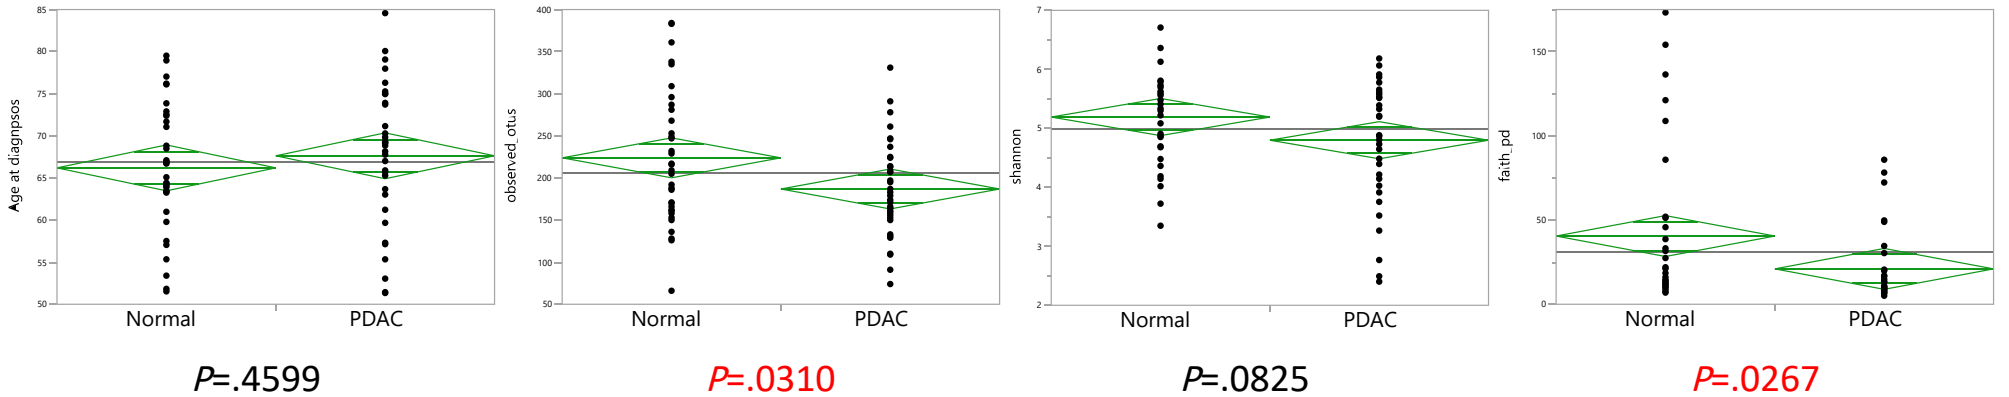

## PPI users: PDAC vs age-matched normal pancreas (n=25 per group)

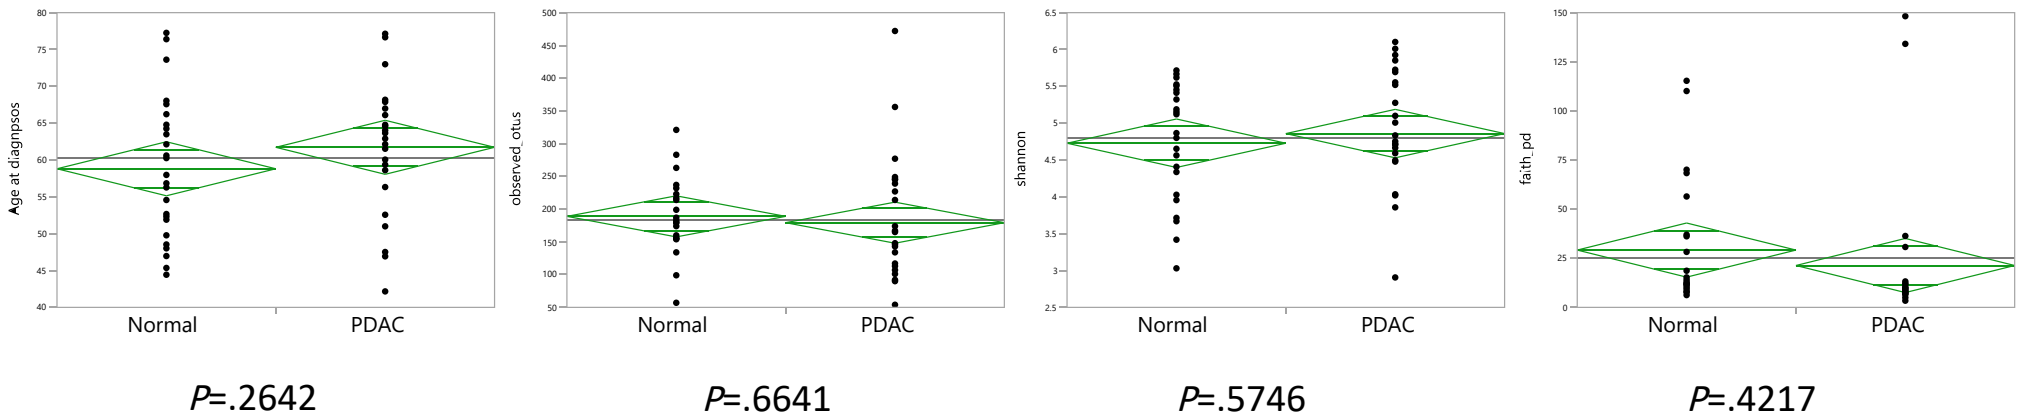

## PPI users

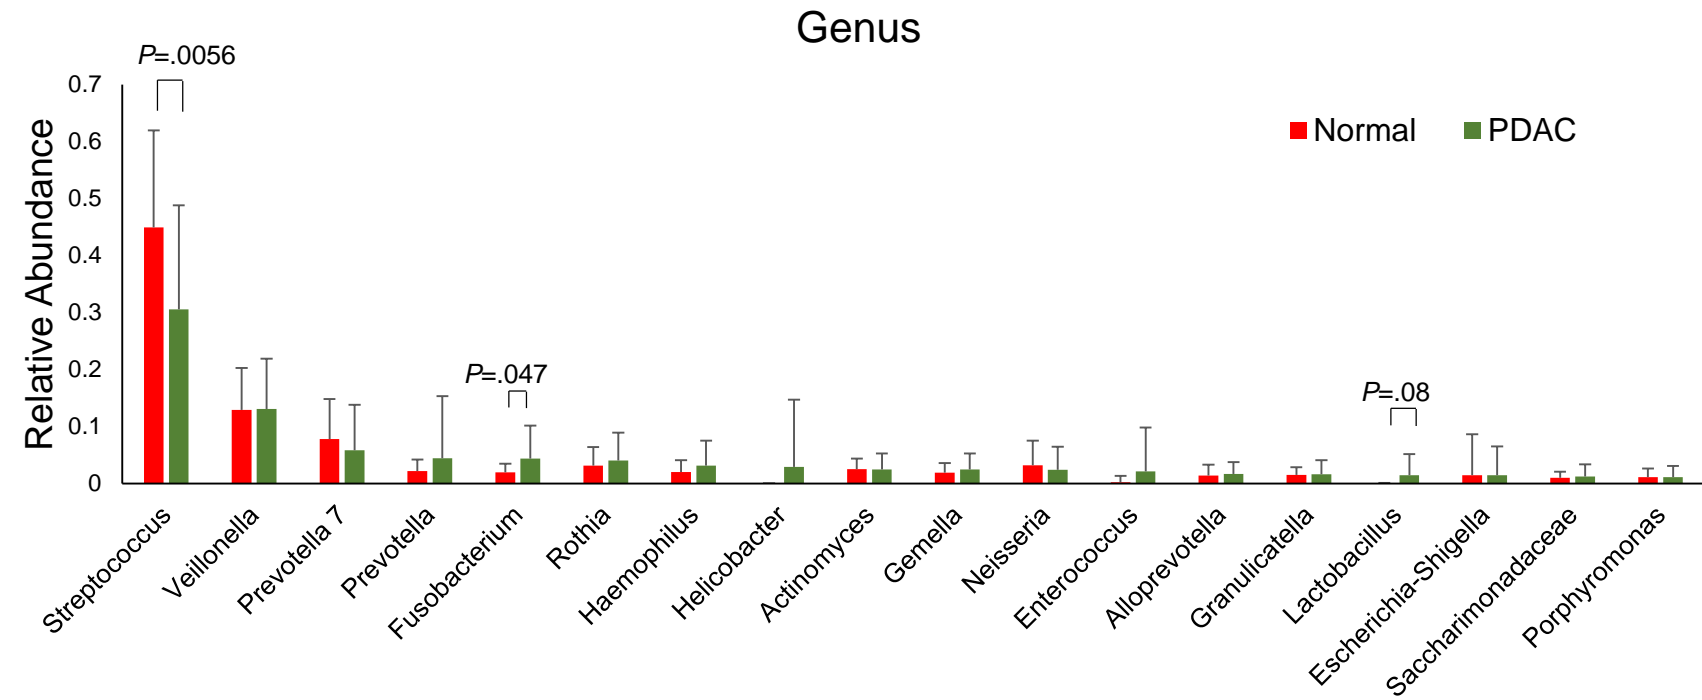

## PPI non users

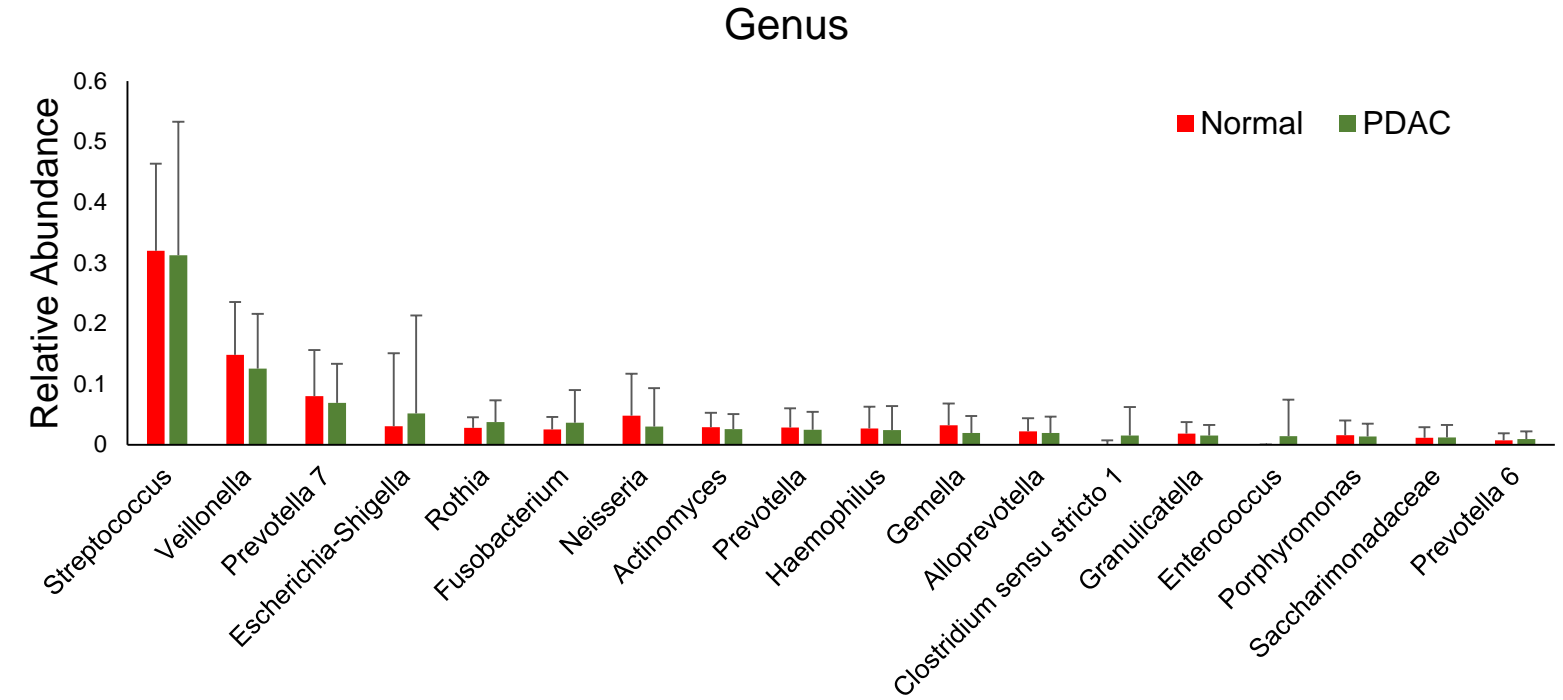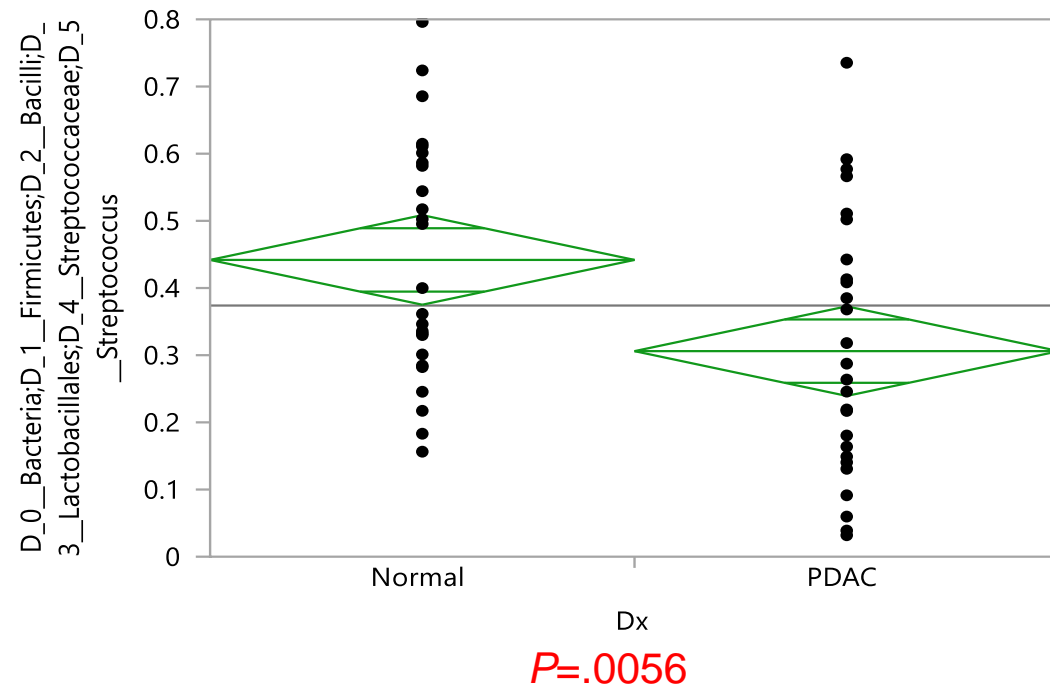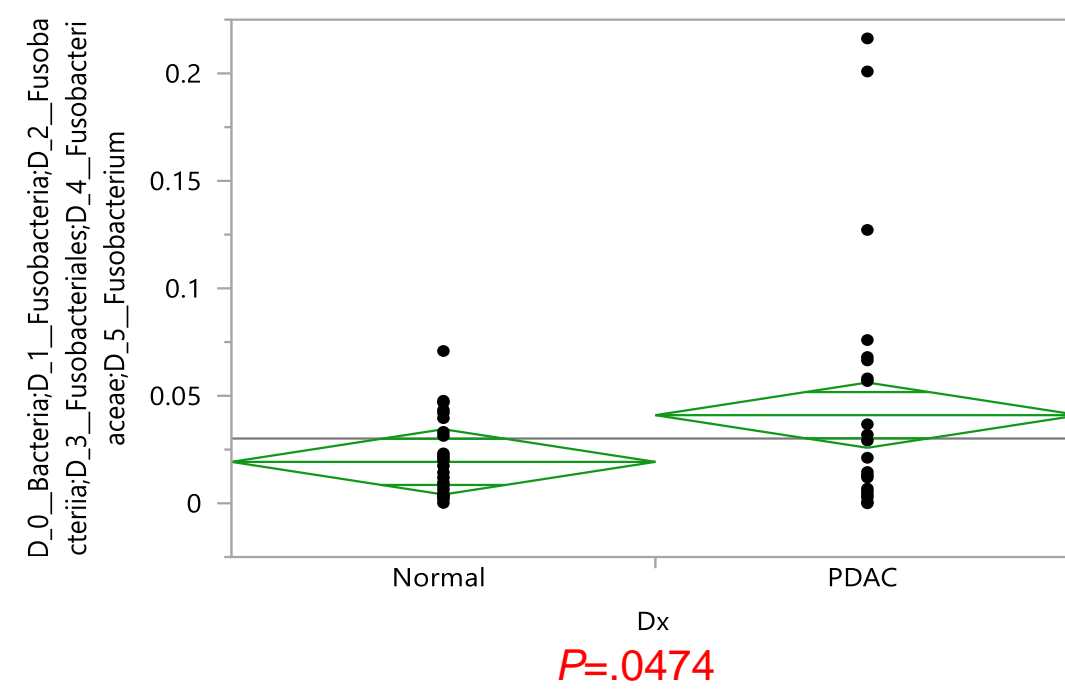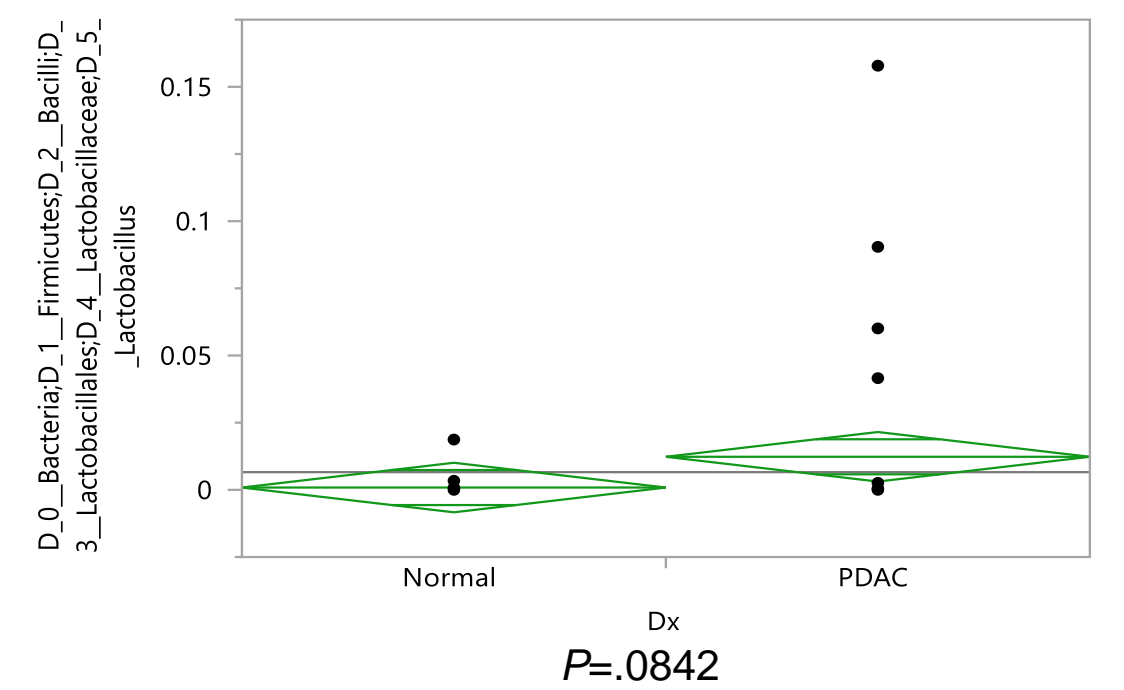

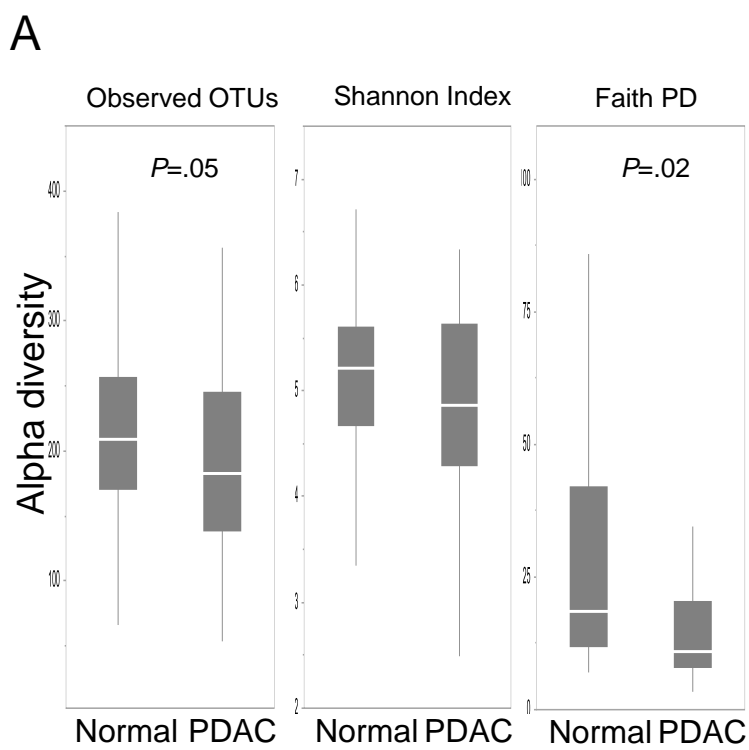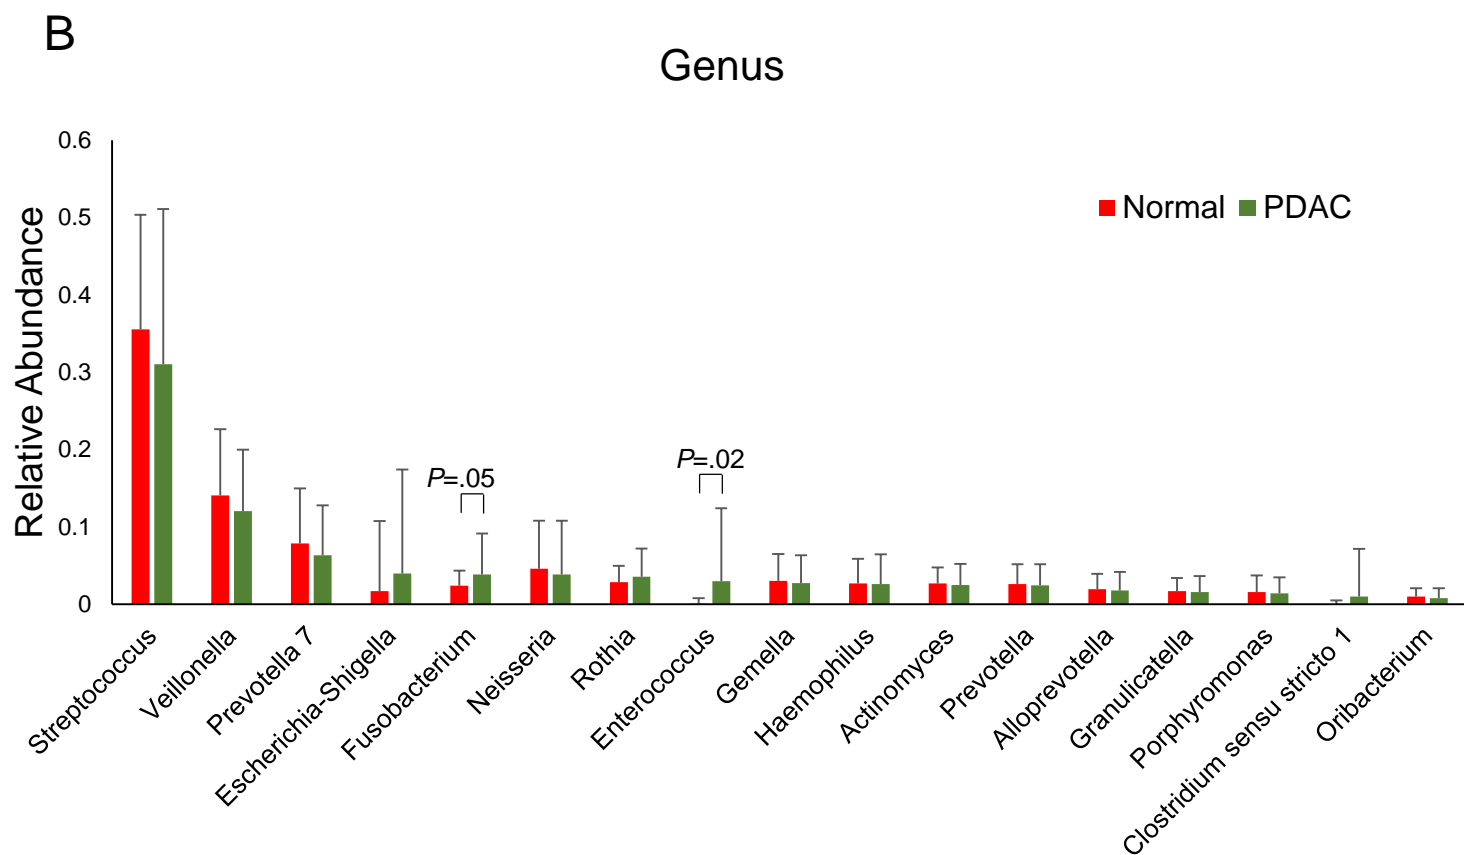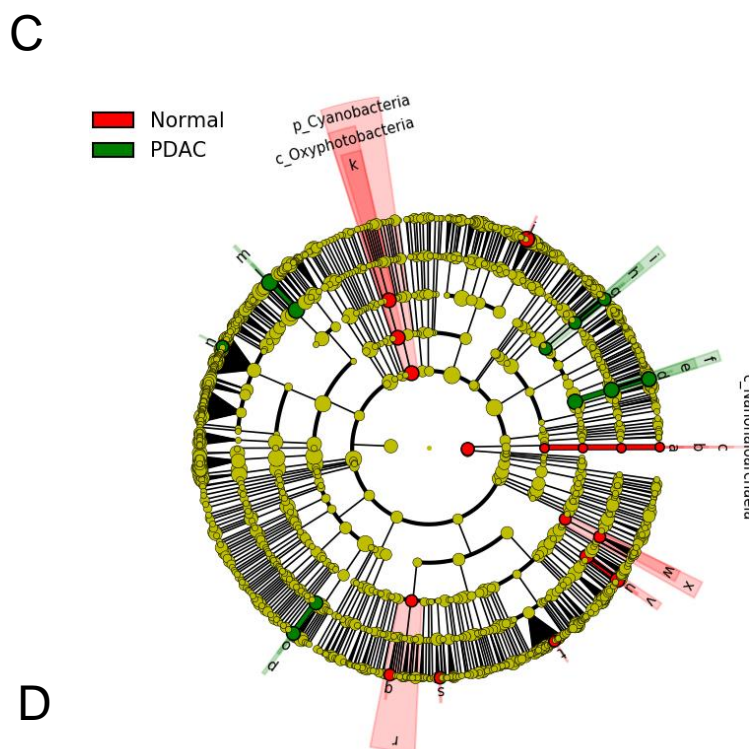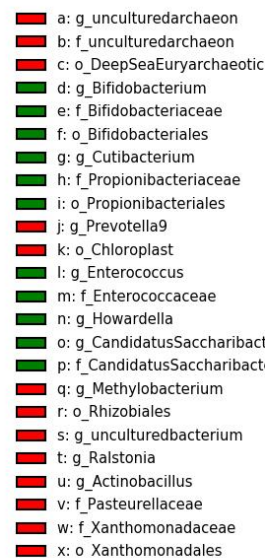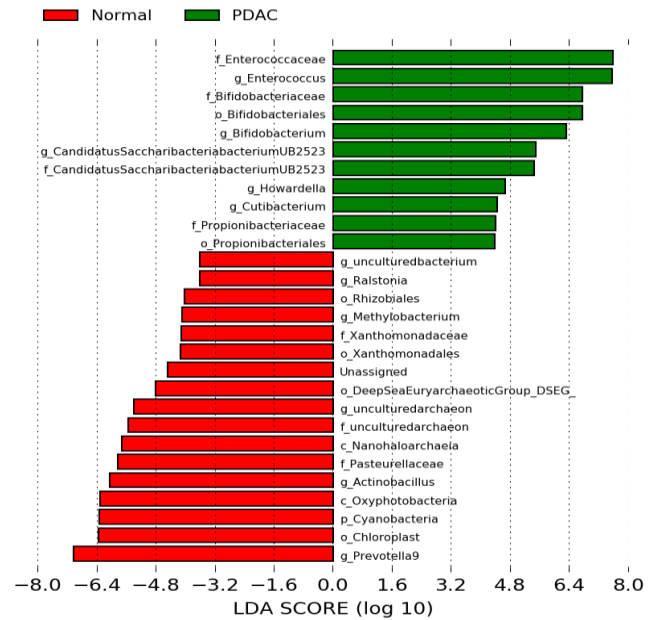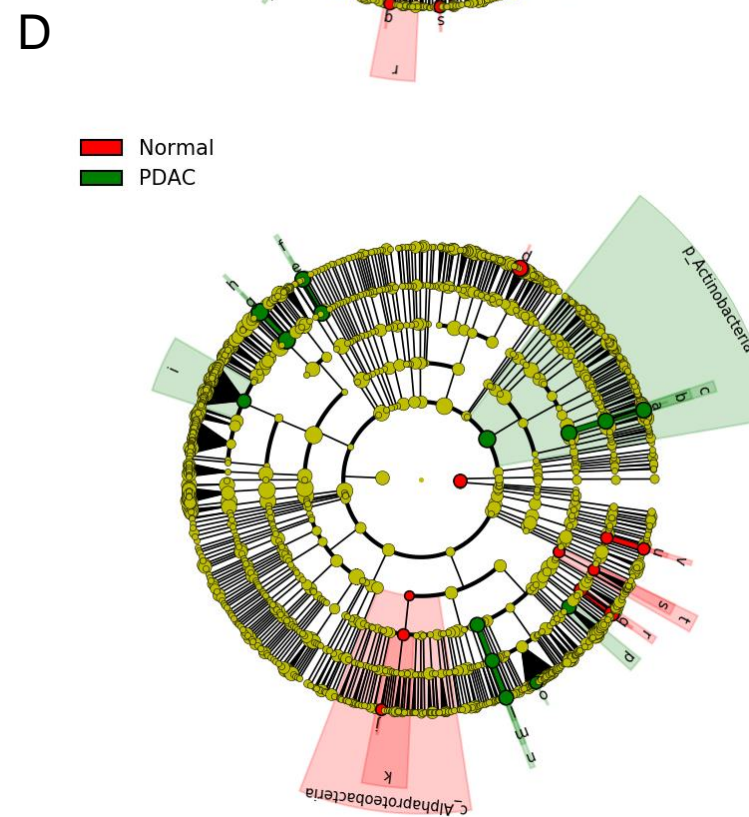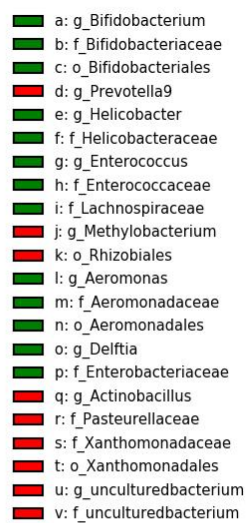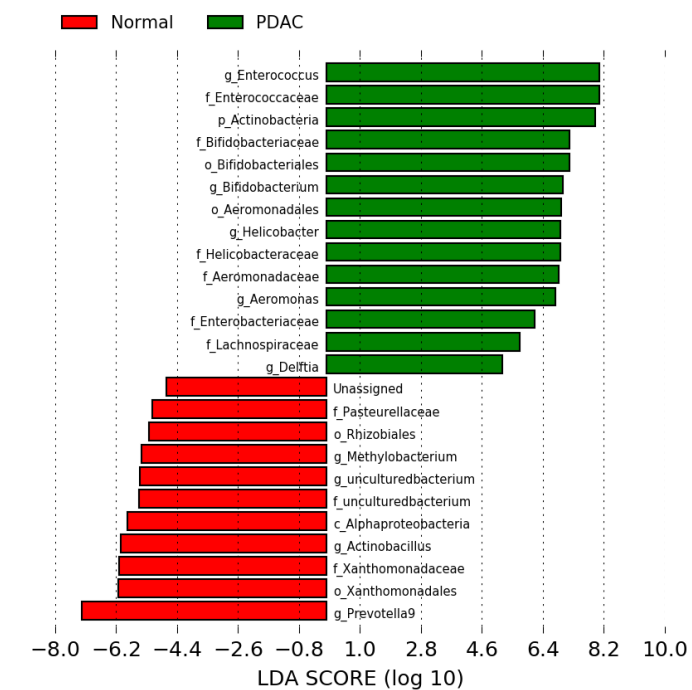

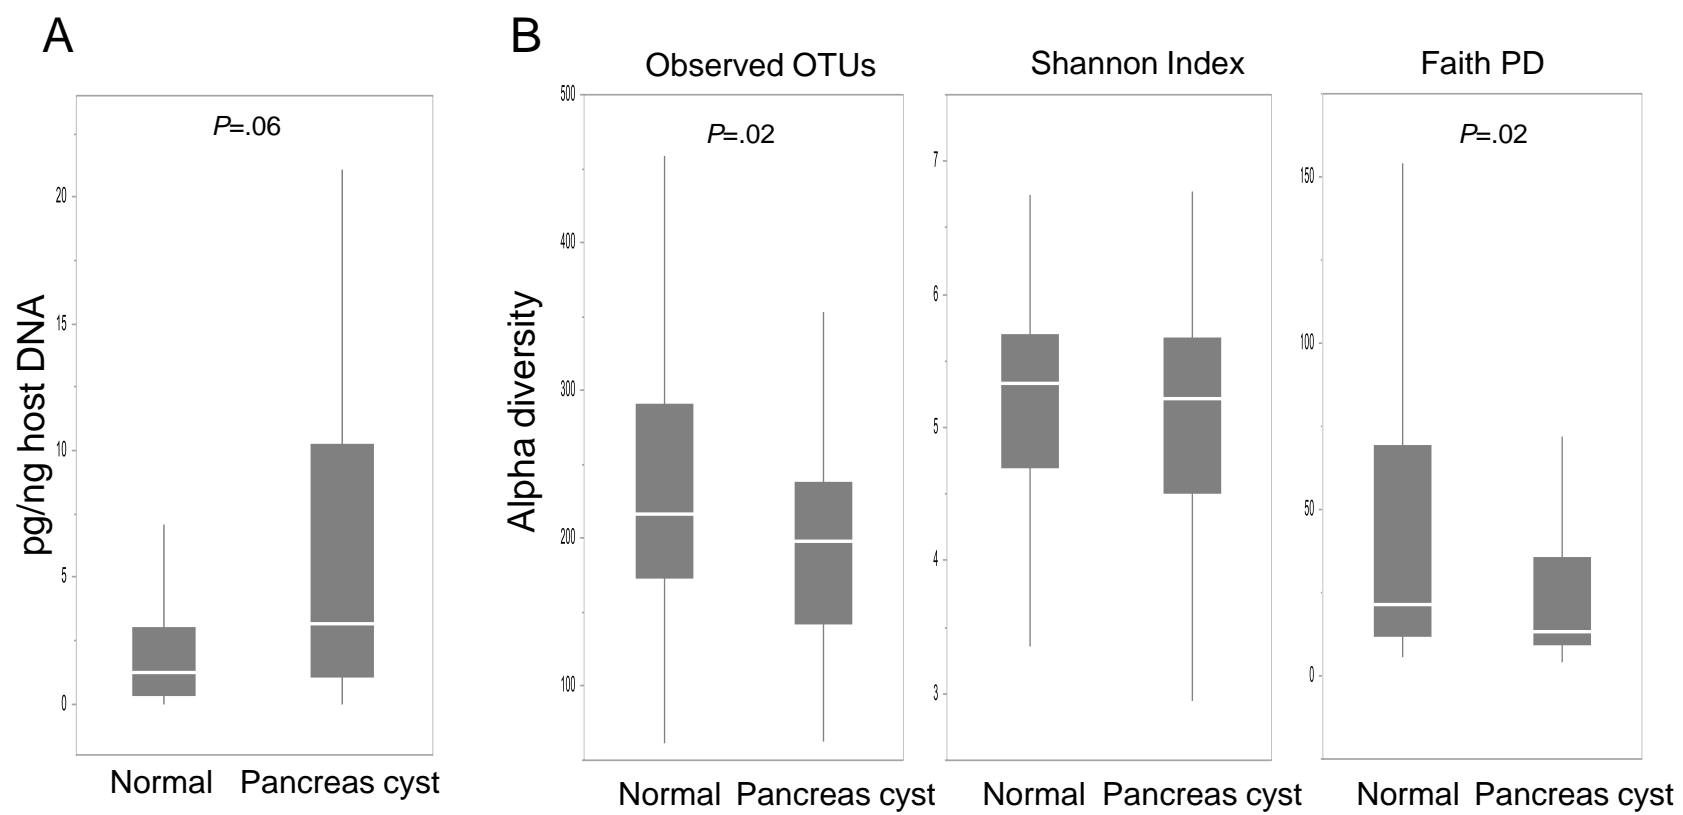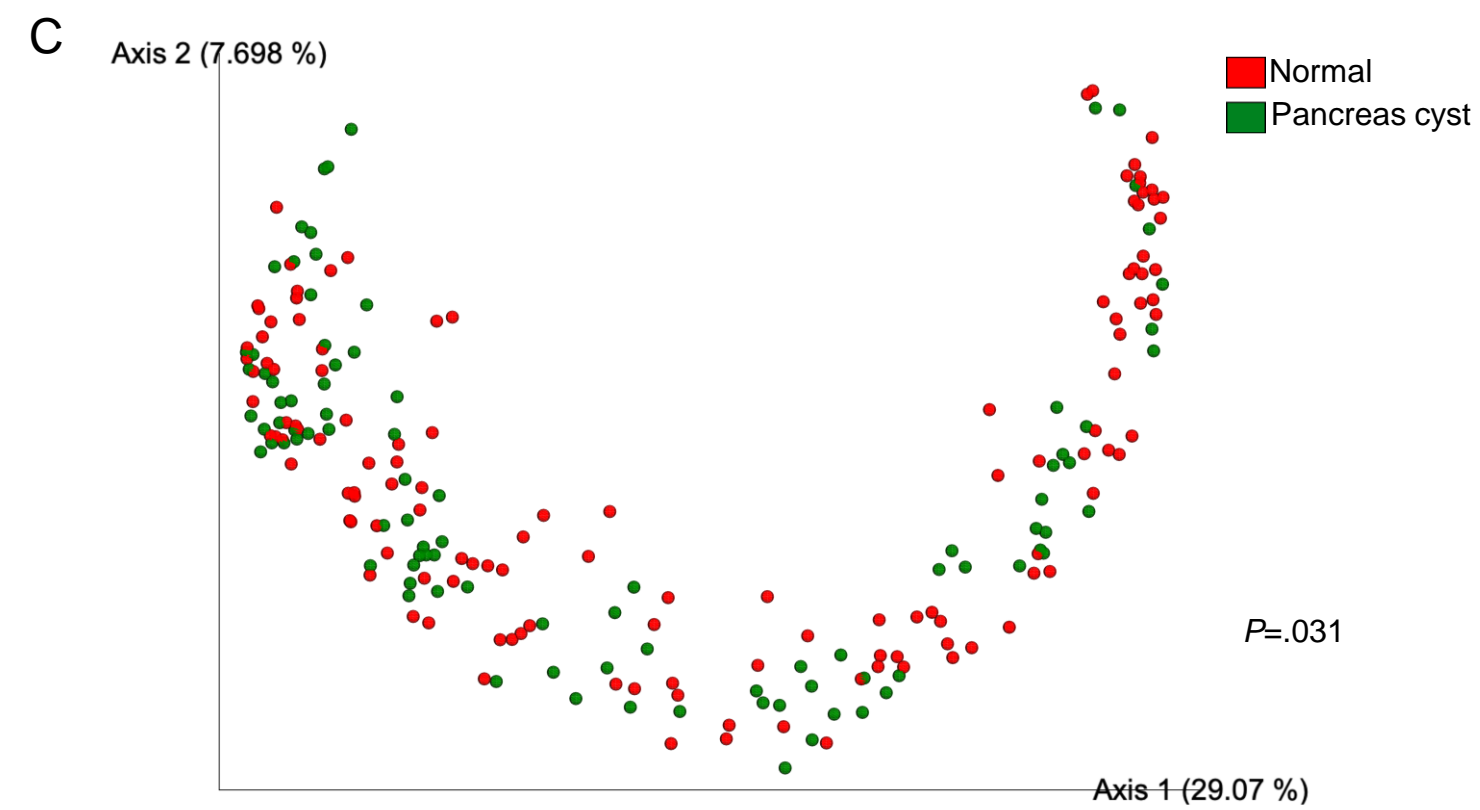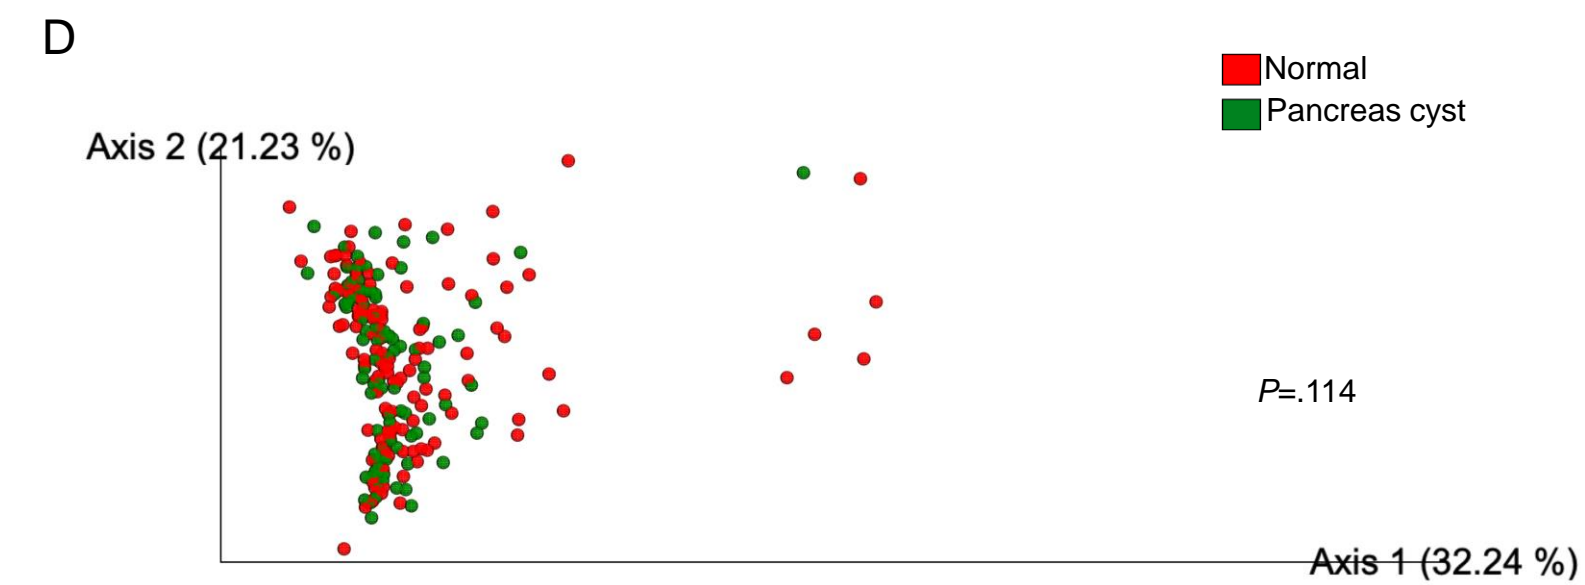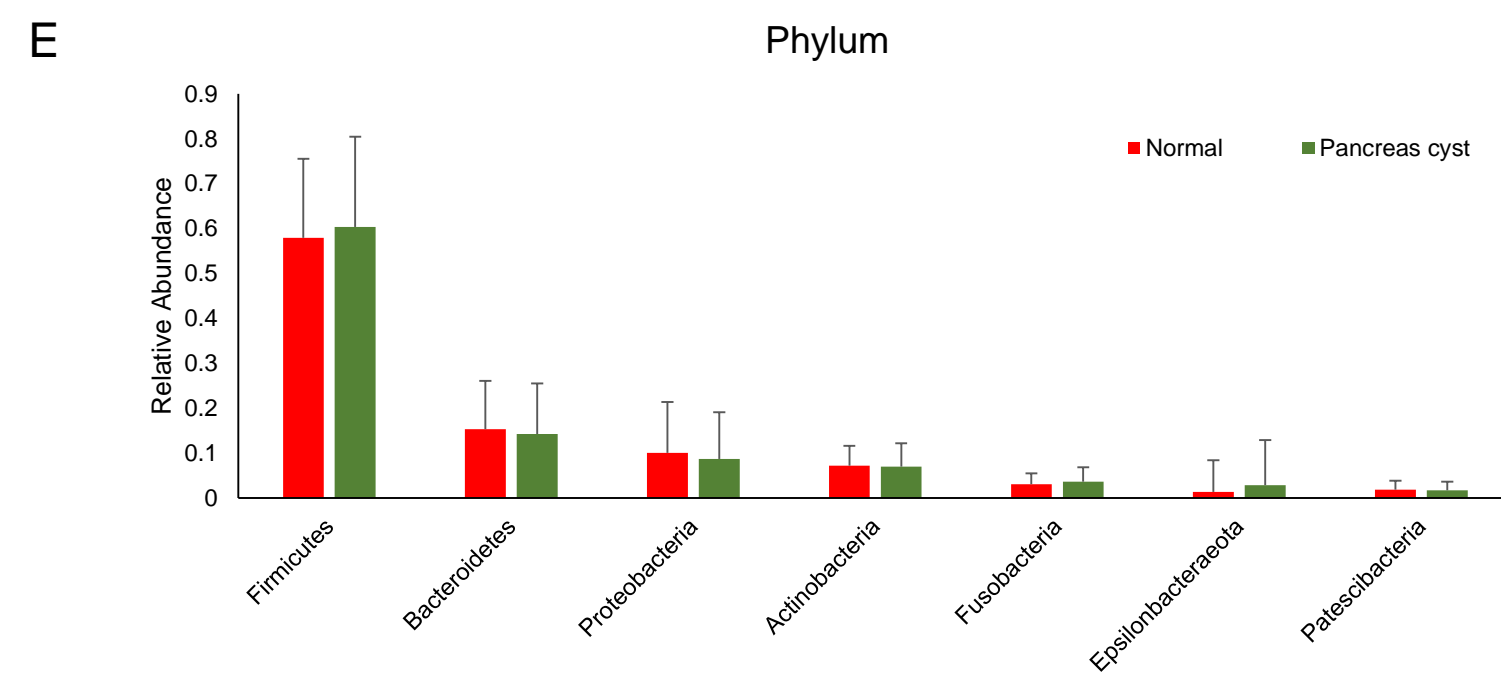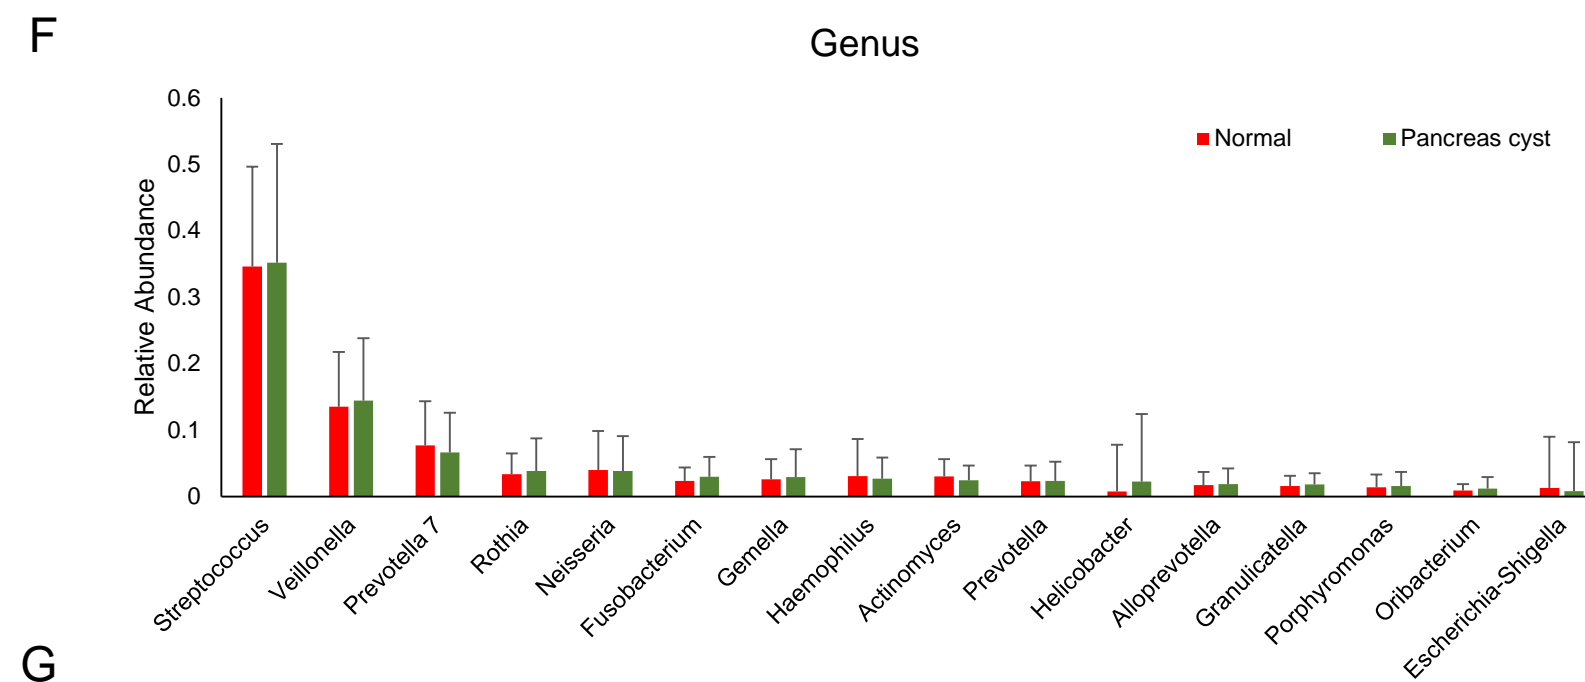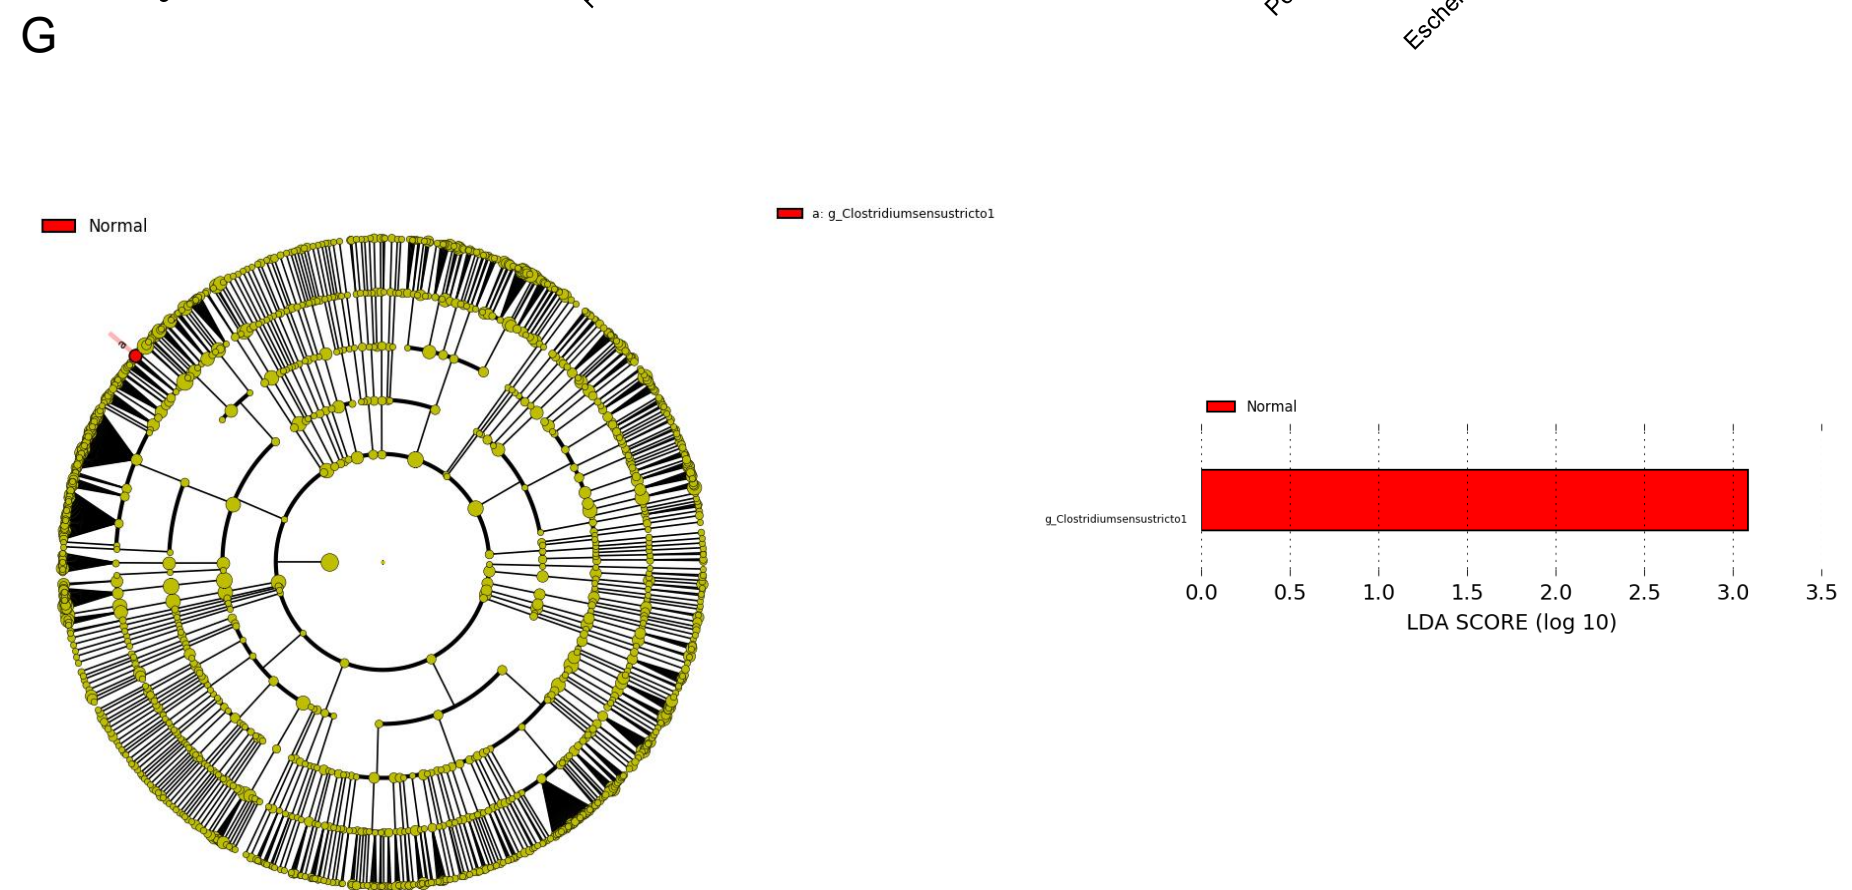

# S10A

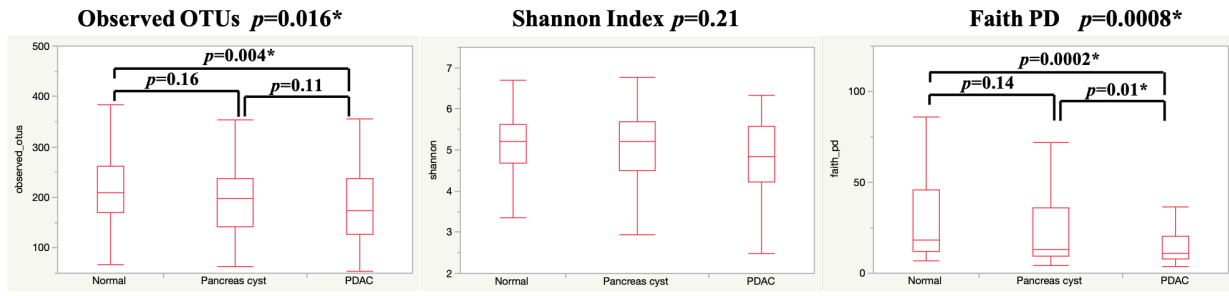

# S10B

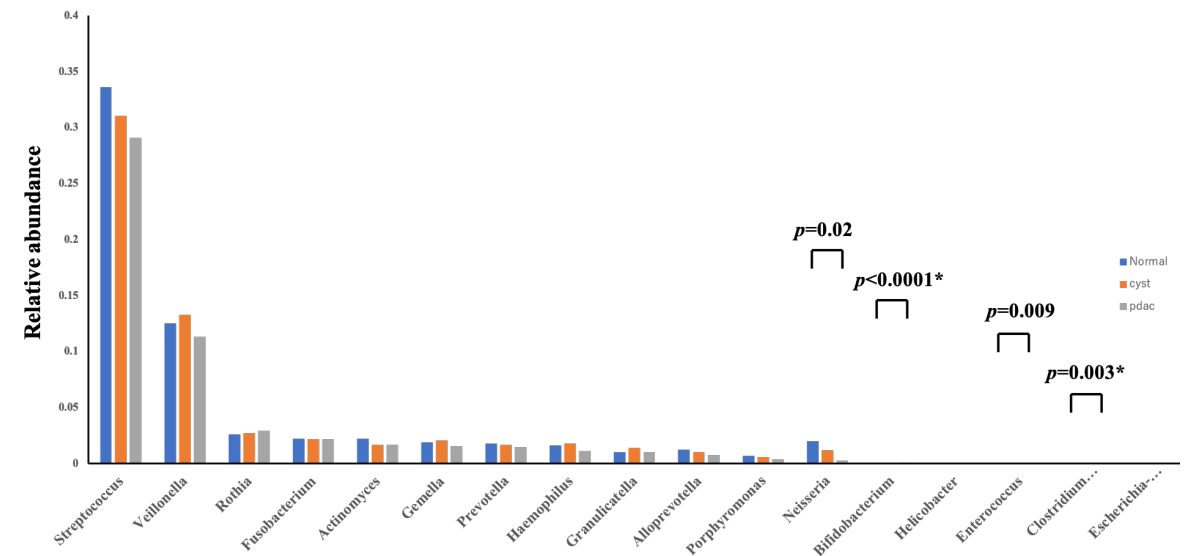

# S10C

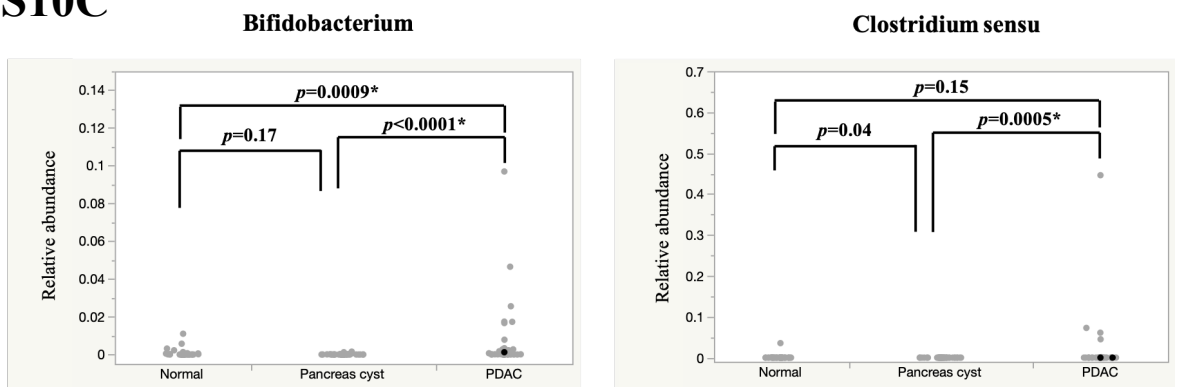

# S10D

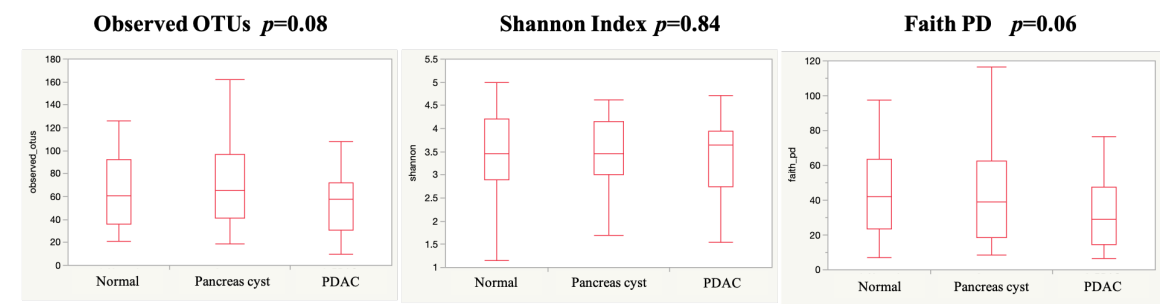

# S10E

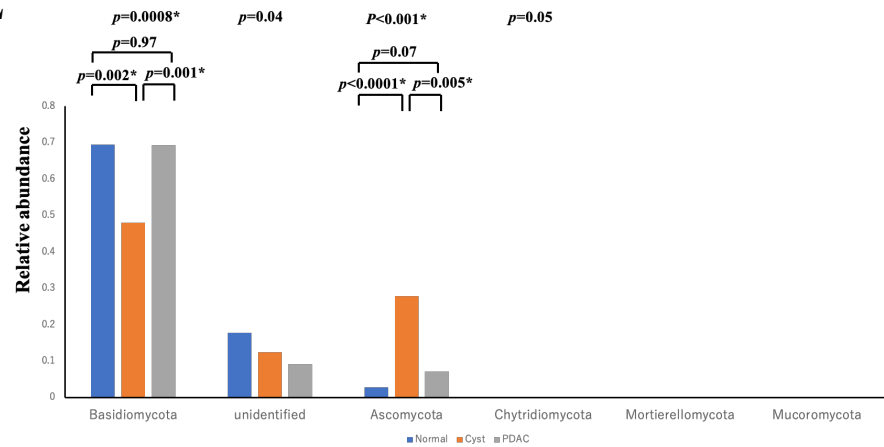

# S11A

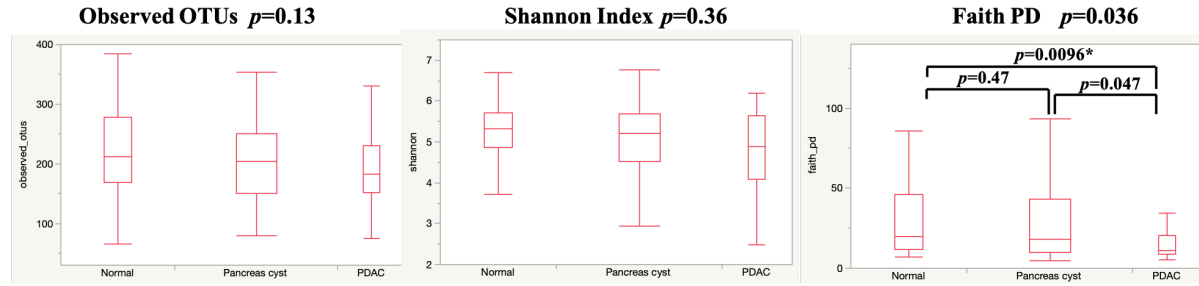

# S11B

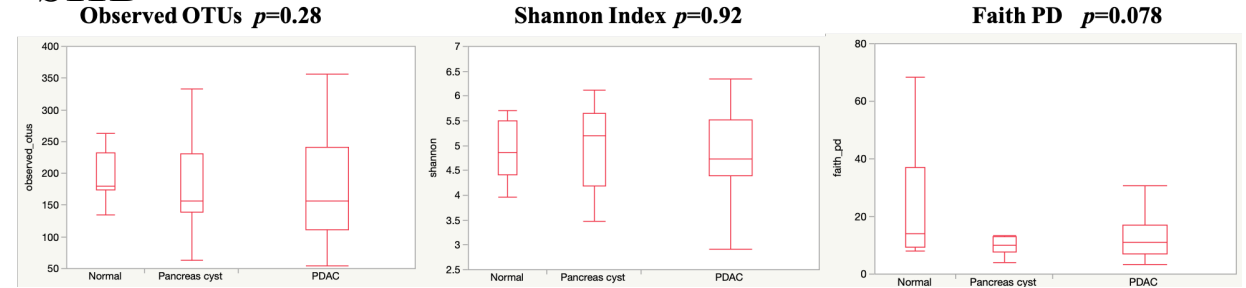

# S11C

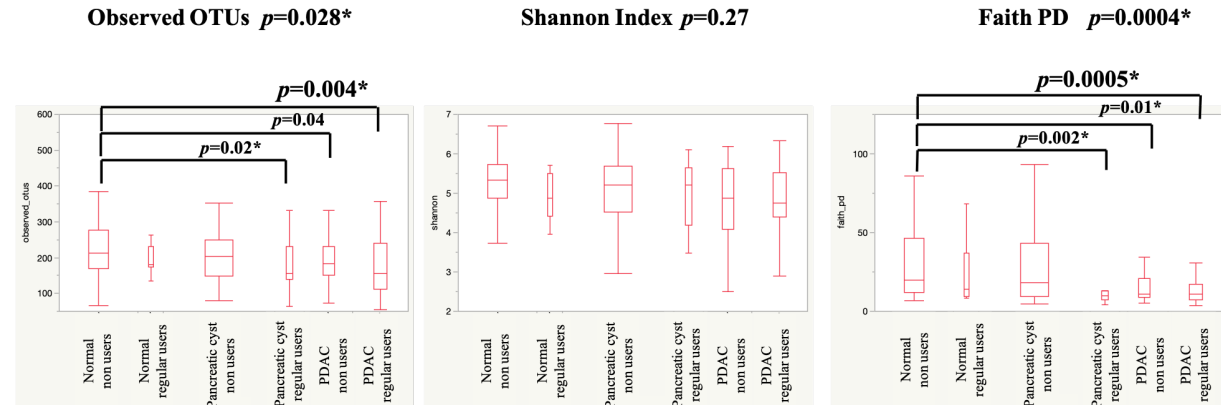

# S11D

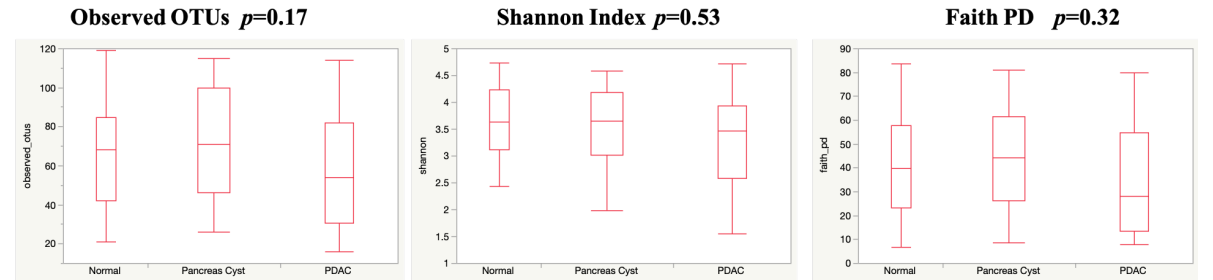

# S11E

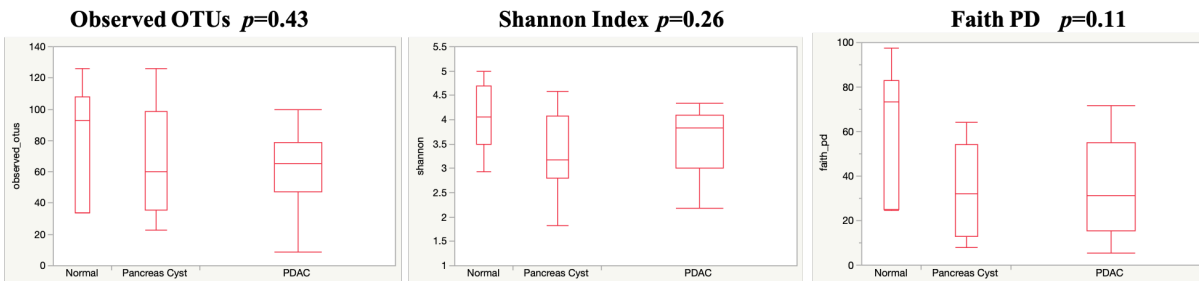

# S11F

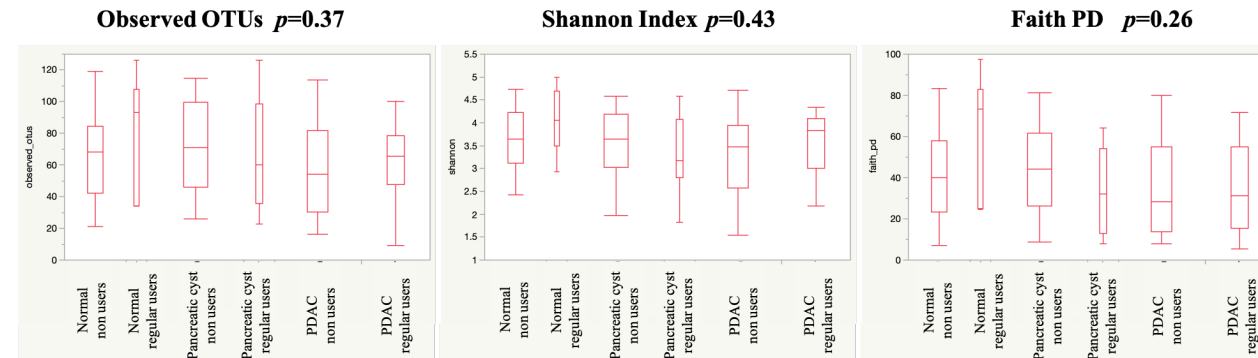



## S12A

**Observed OTUs**  $p=0.025^*$

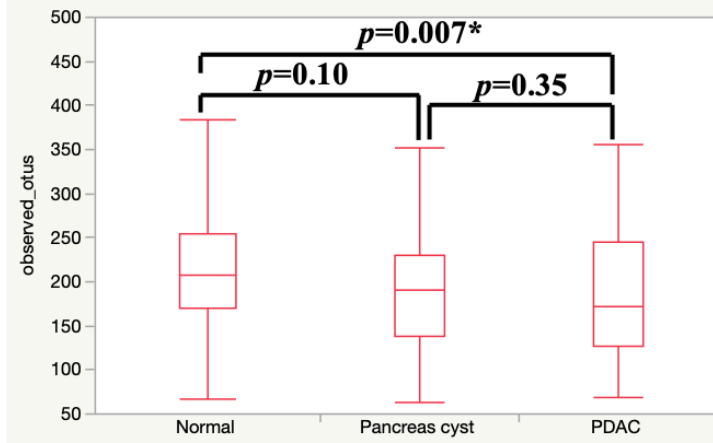

**Shannon Index**  $p=0.23$

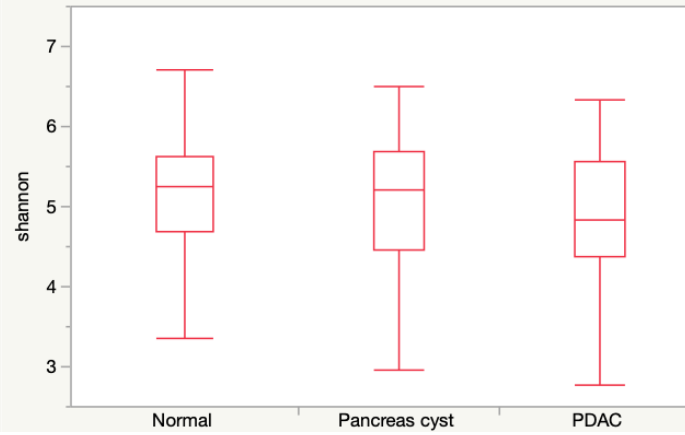

**Faith PD**  $p=0.004^*$

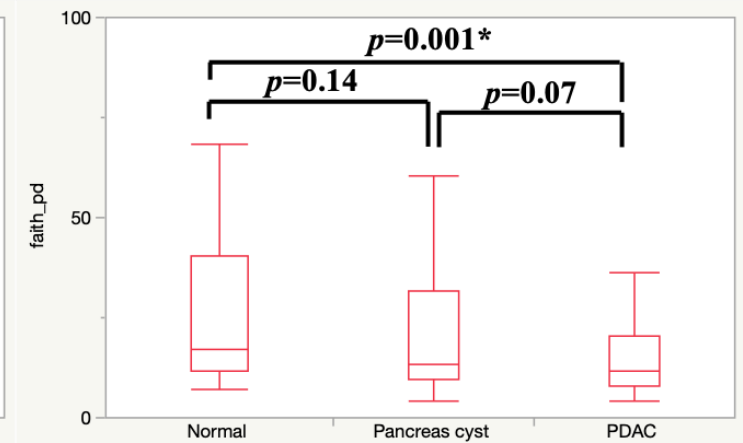

## S12B

**Observed OTUs**  $p=0.21$

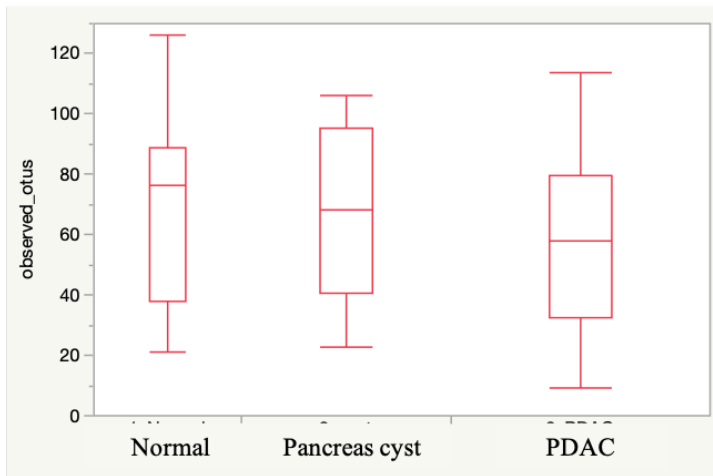

**Shannon Index**  $p=0.41$

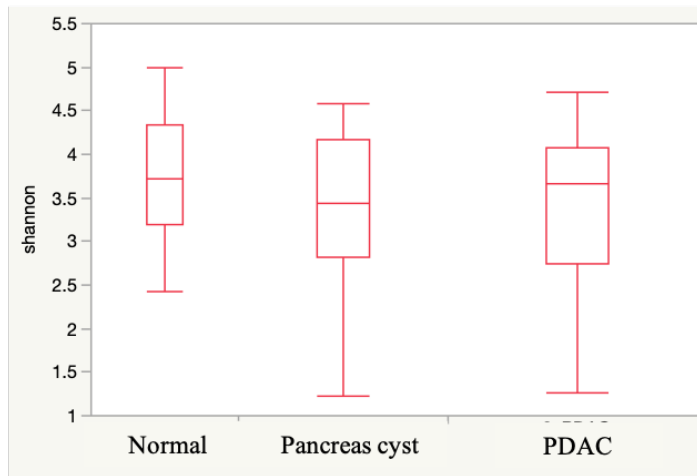

**Faith PD**  $p=0.21$

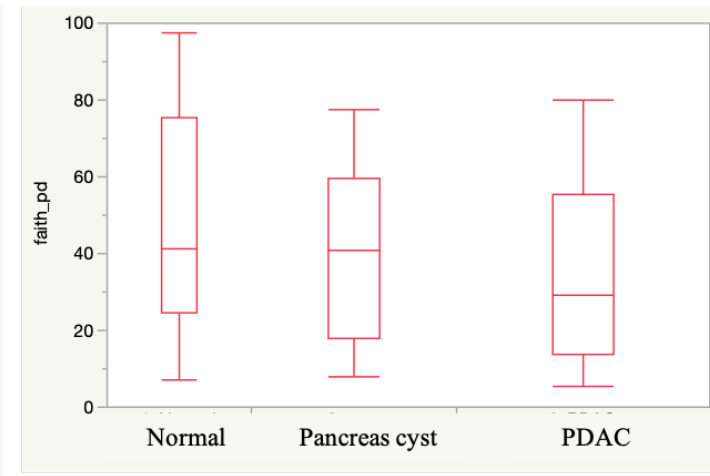

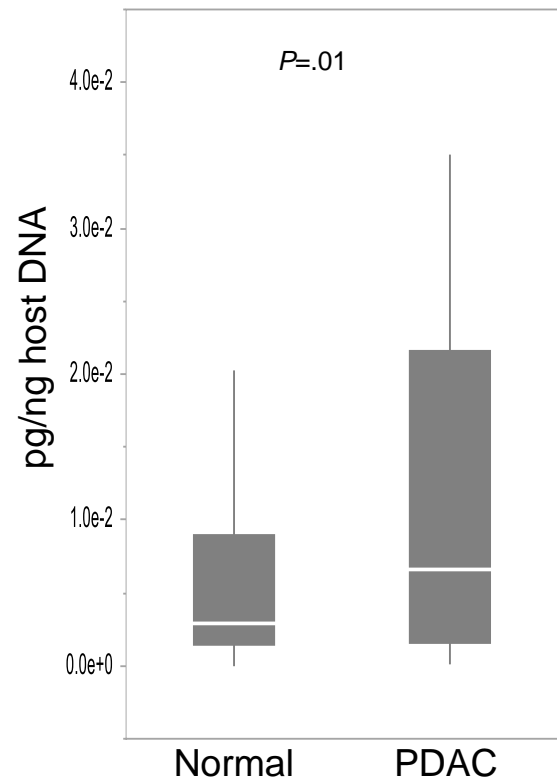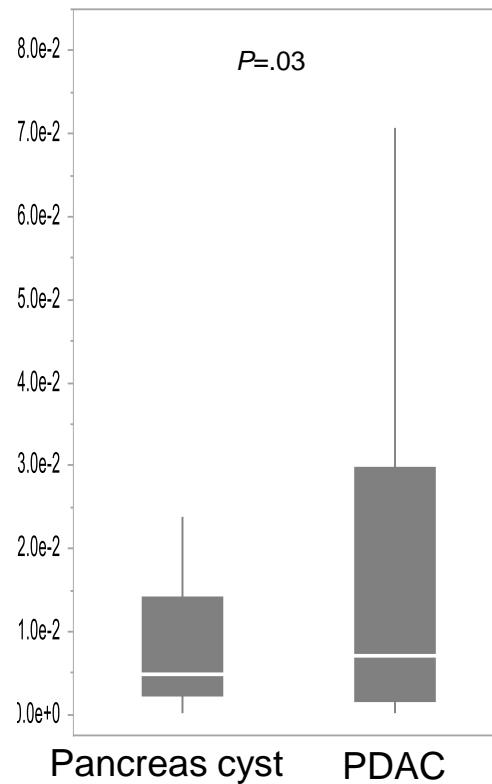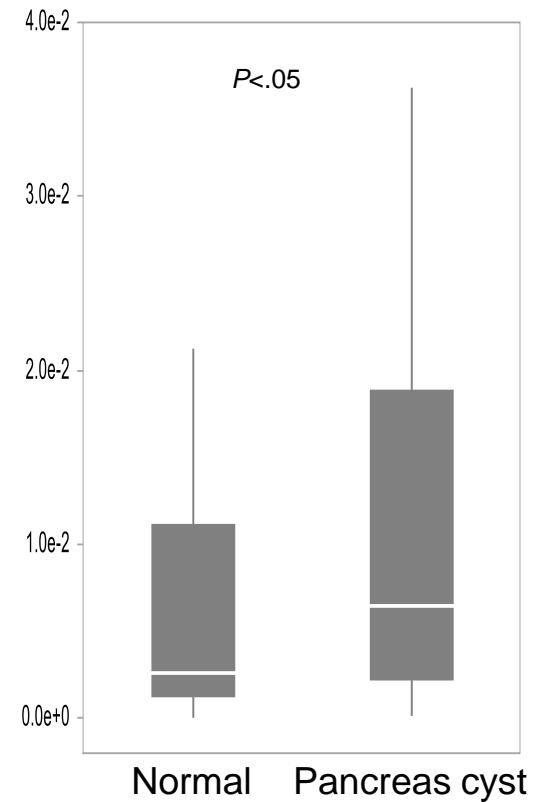

**A****Phylum**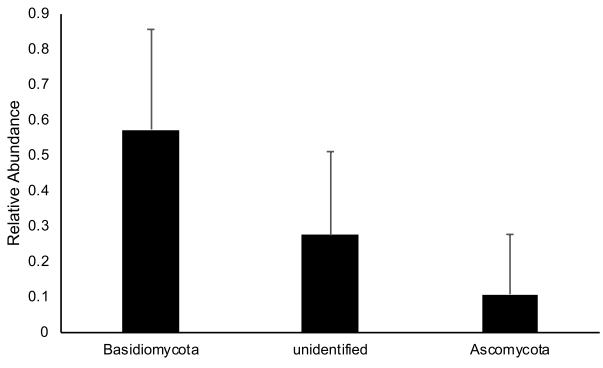**B****Class**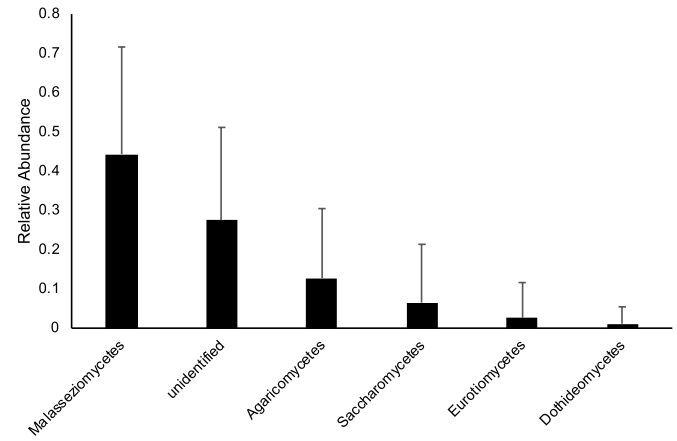**C****Order**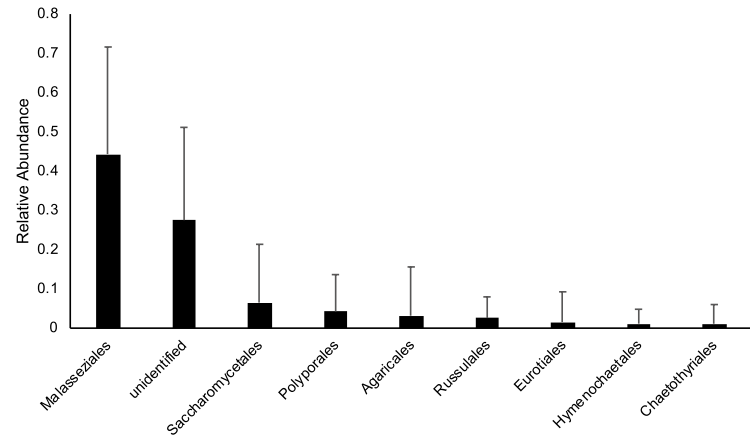**D****Family**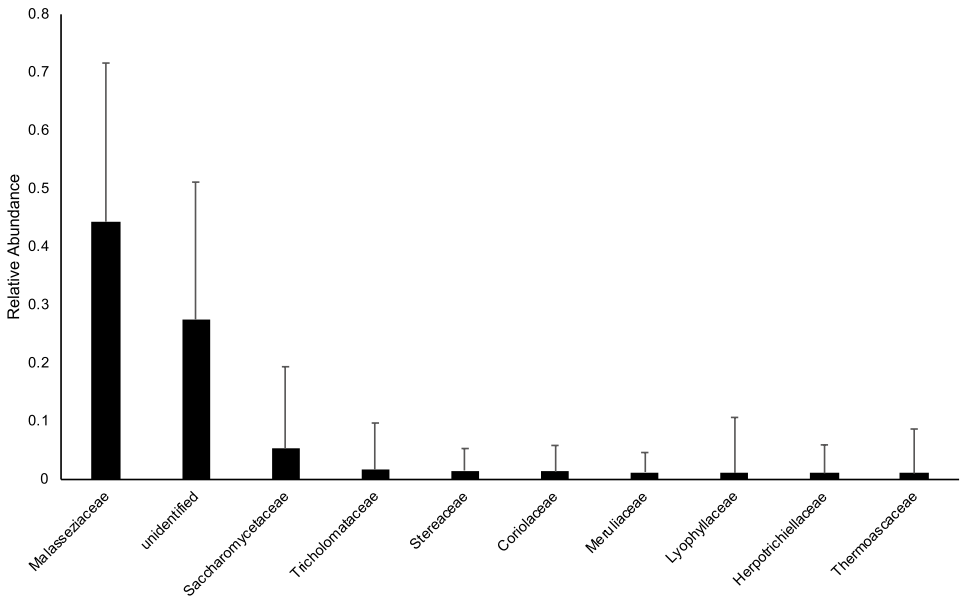**E****Genus**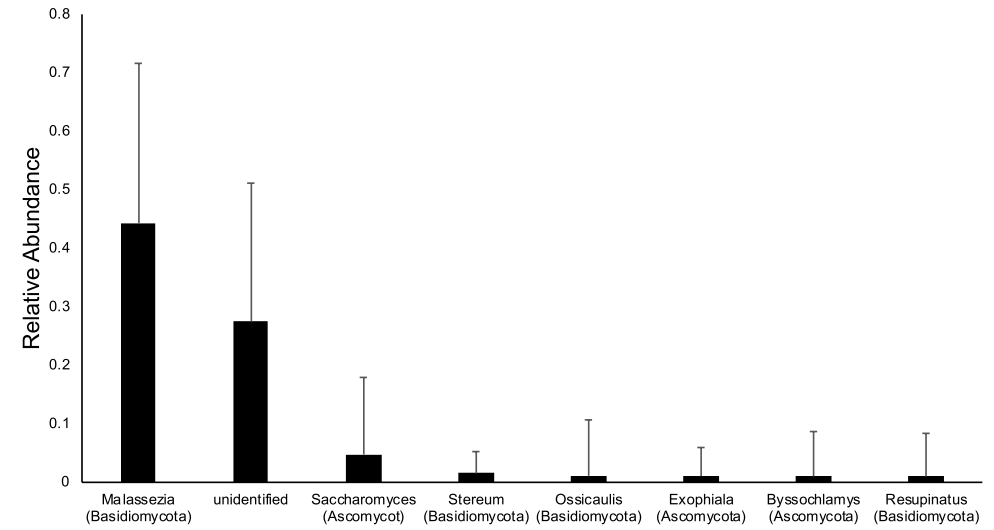

A

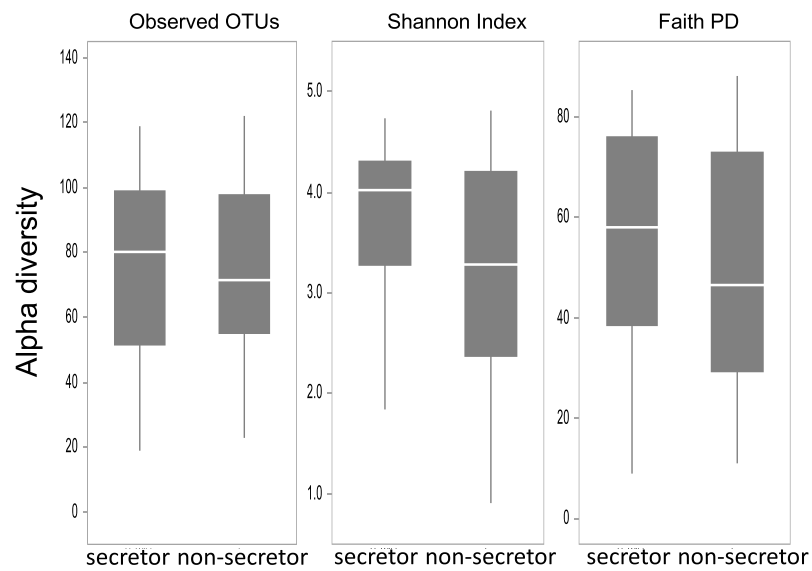

B

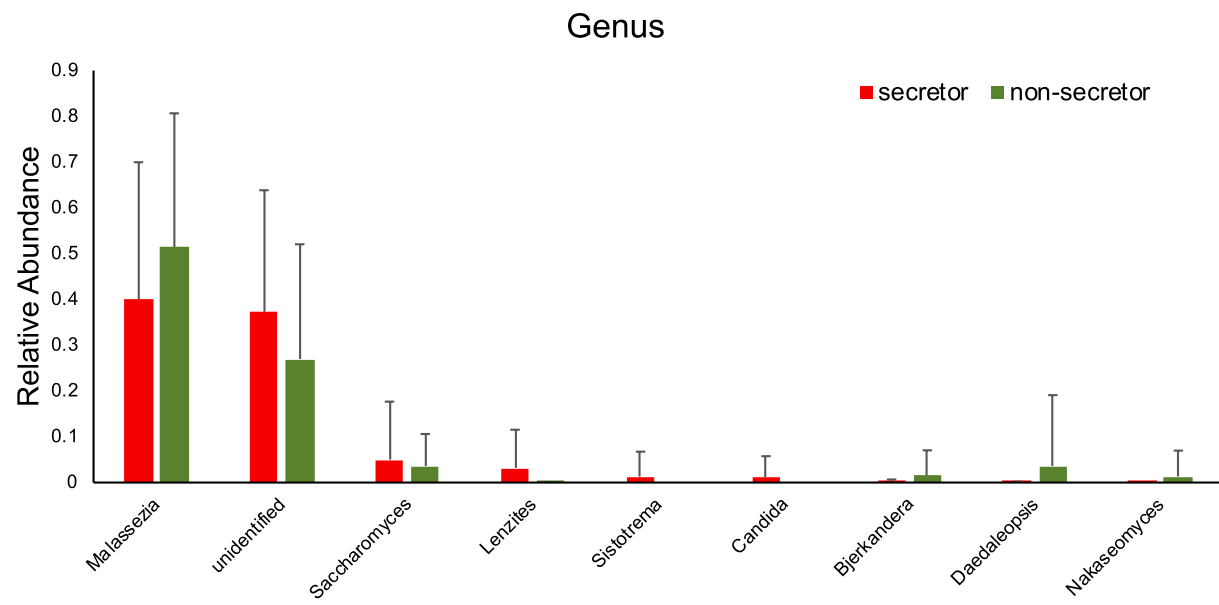

C

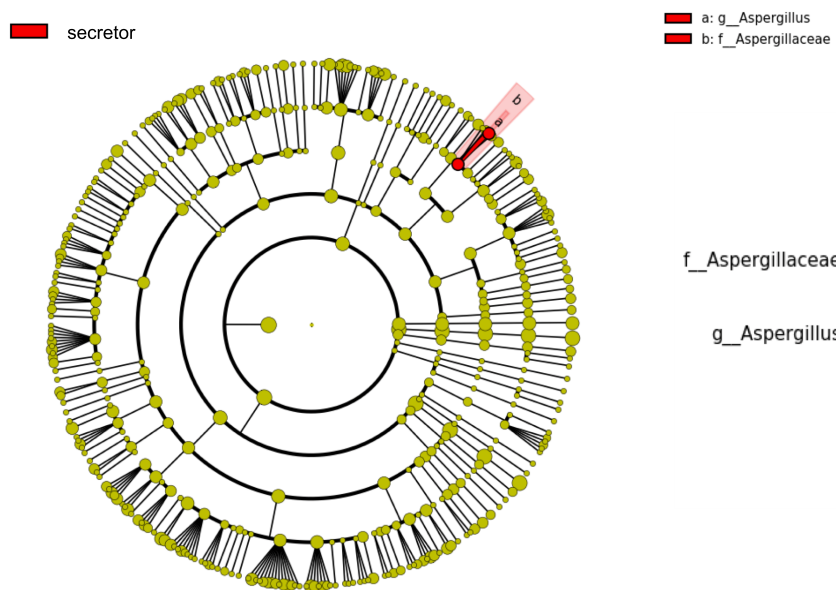

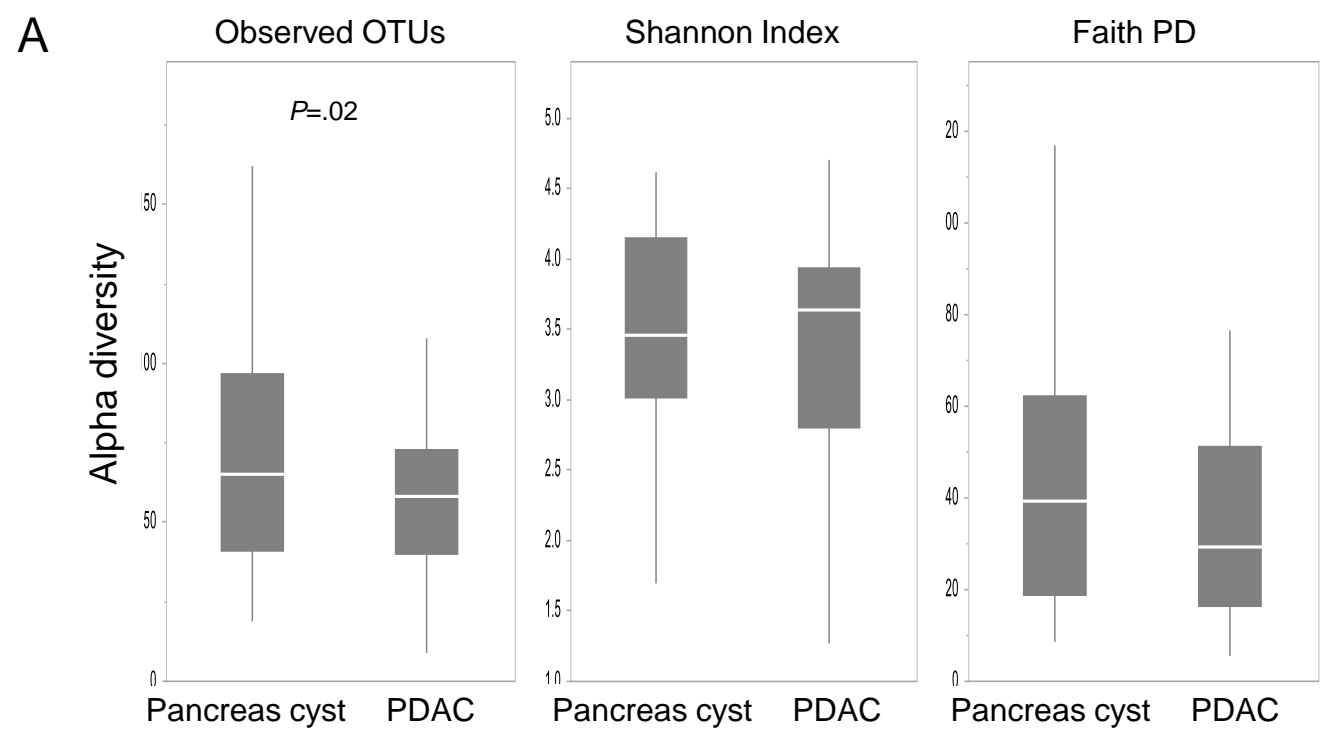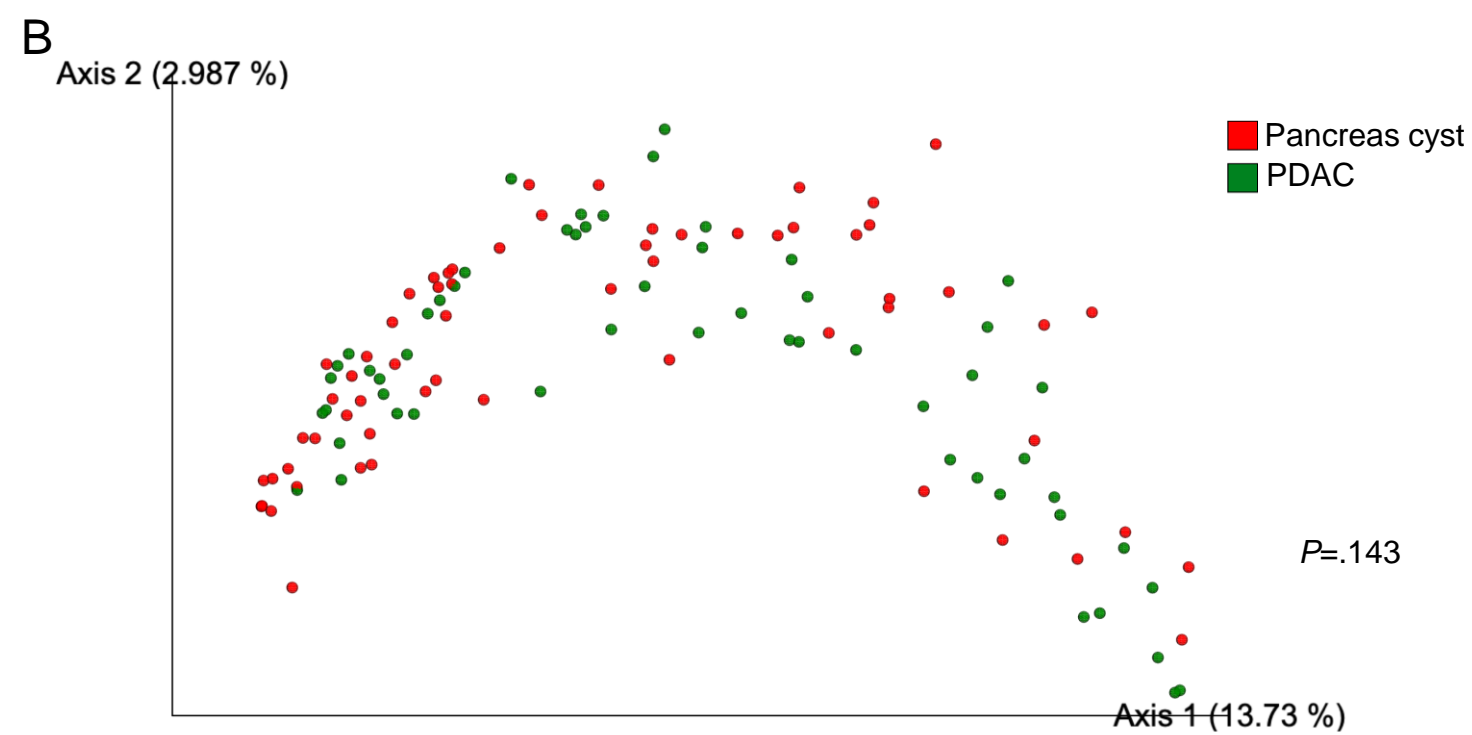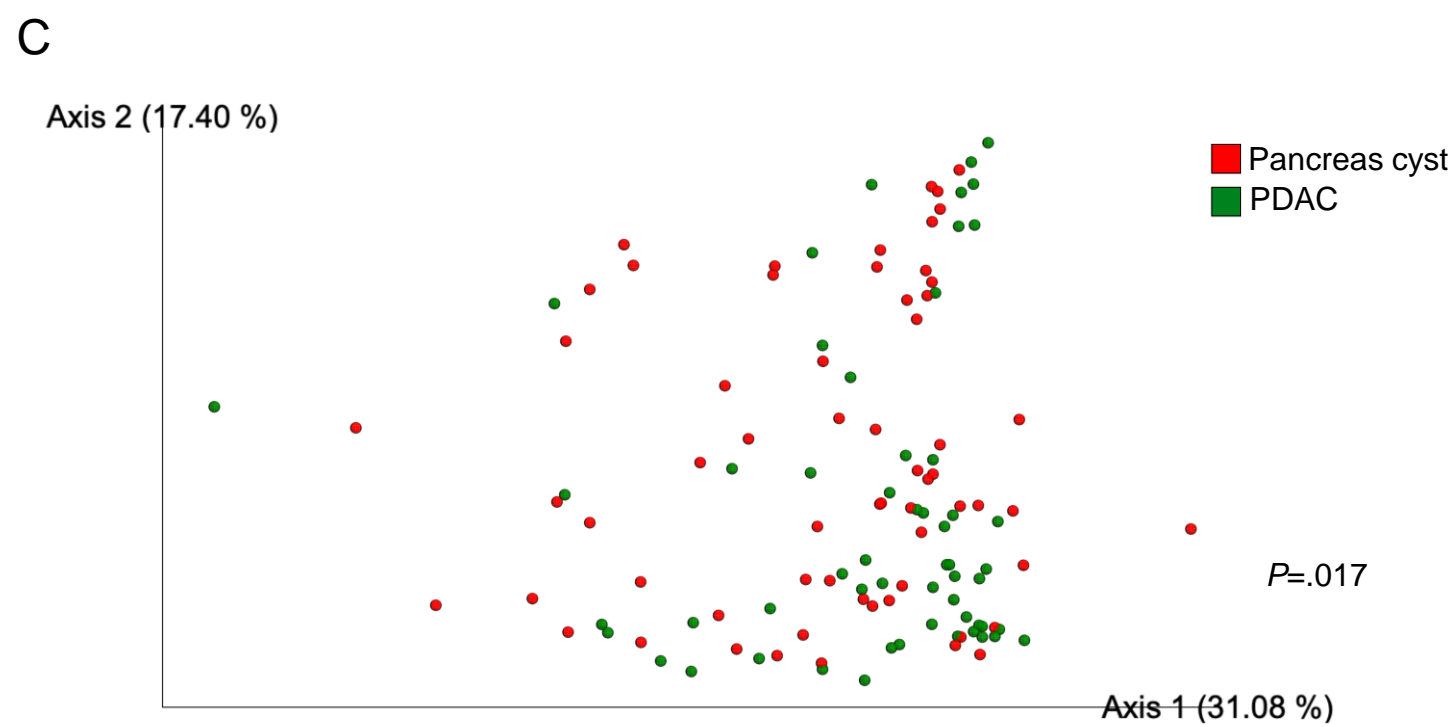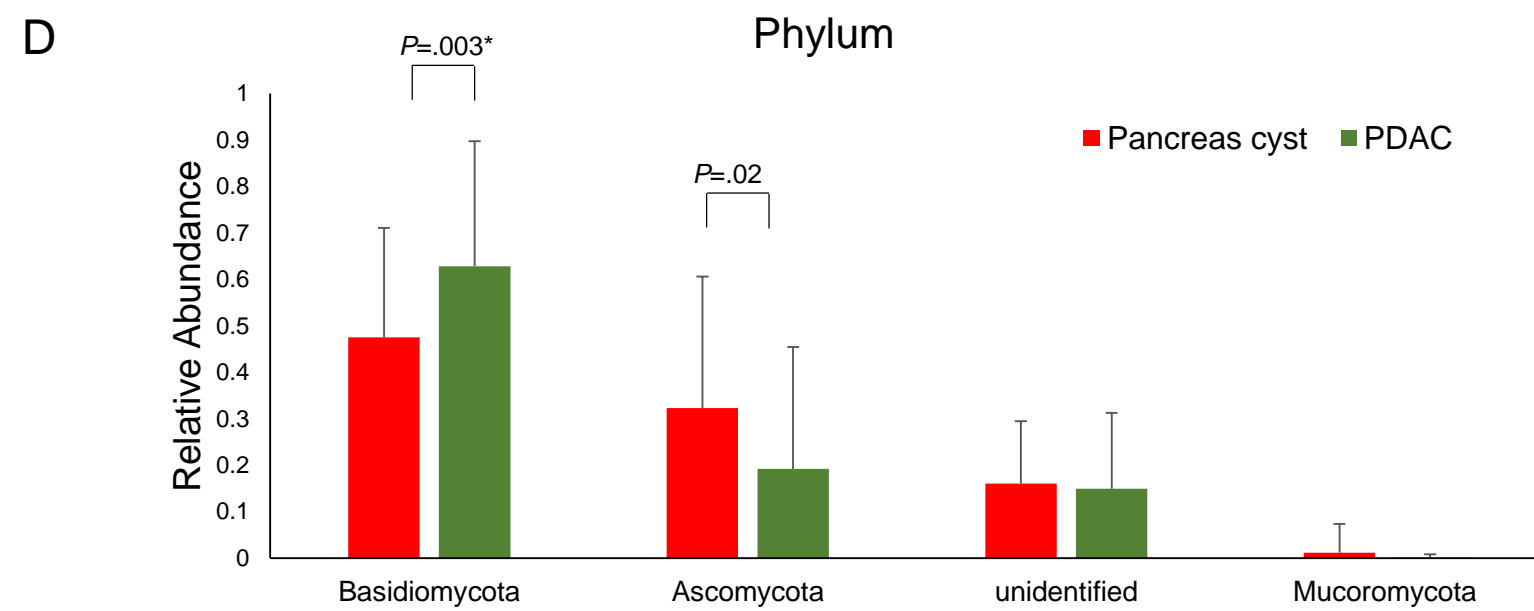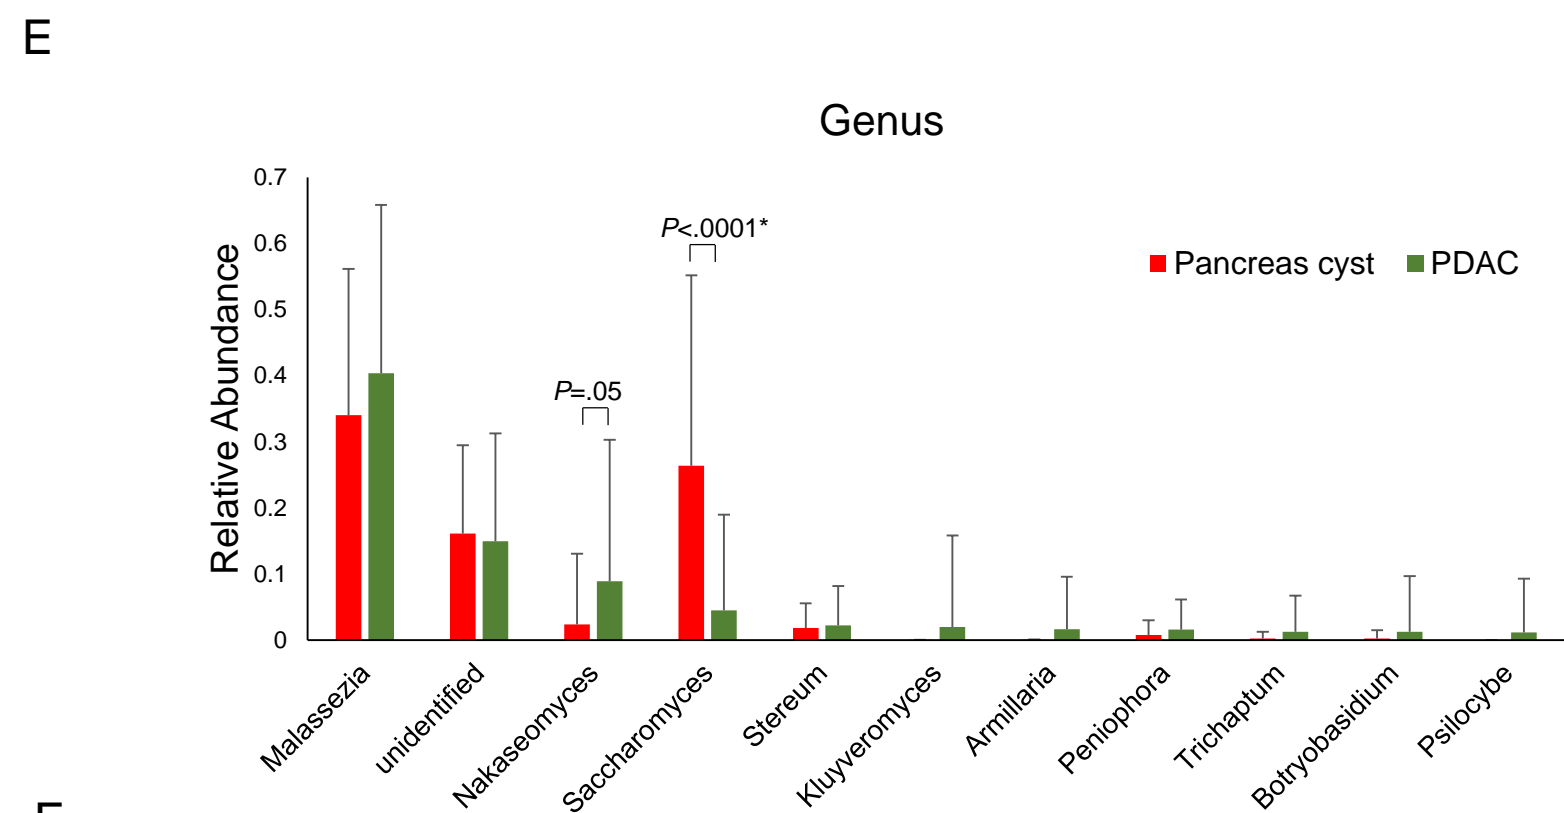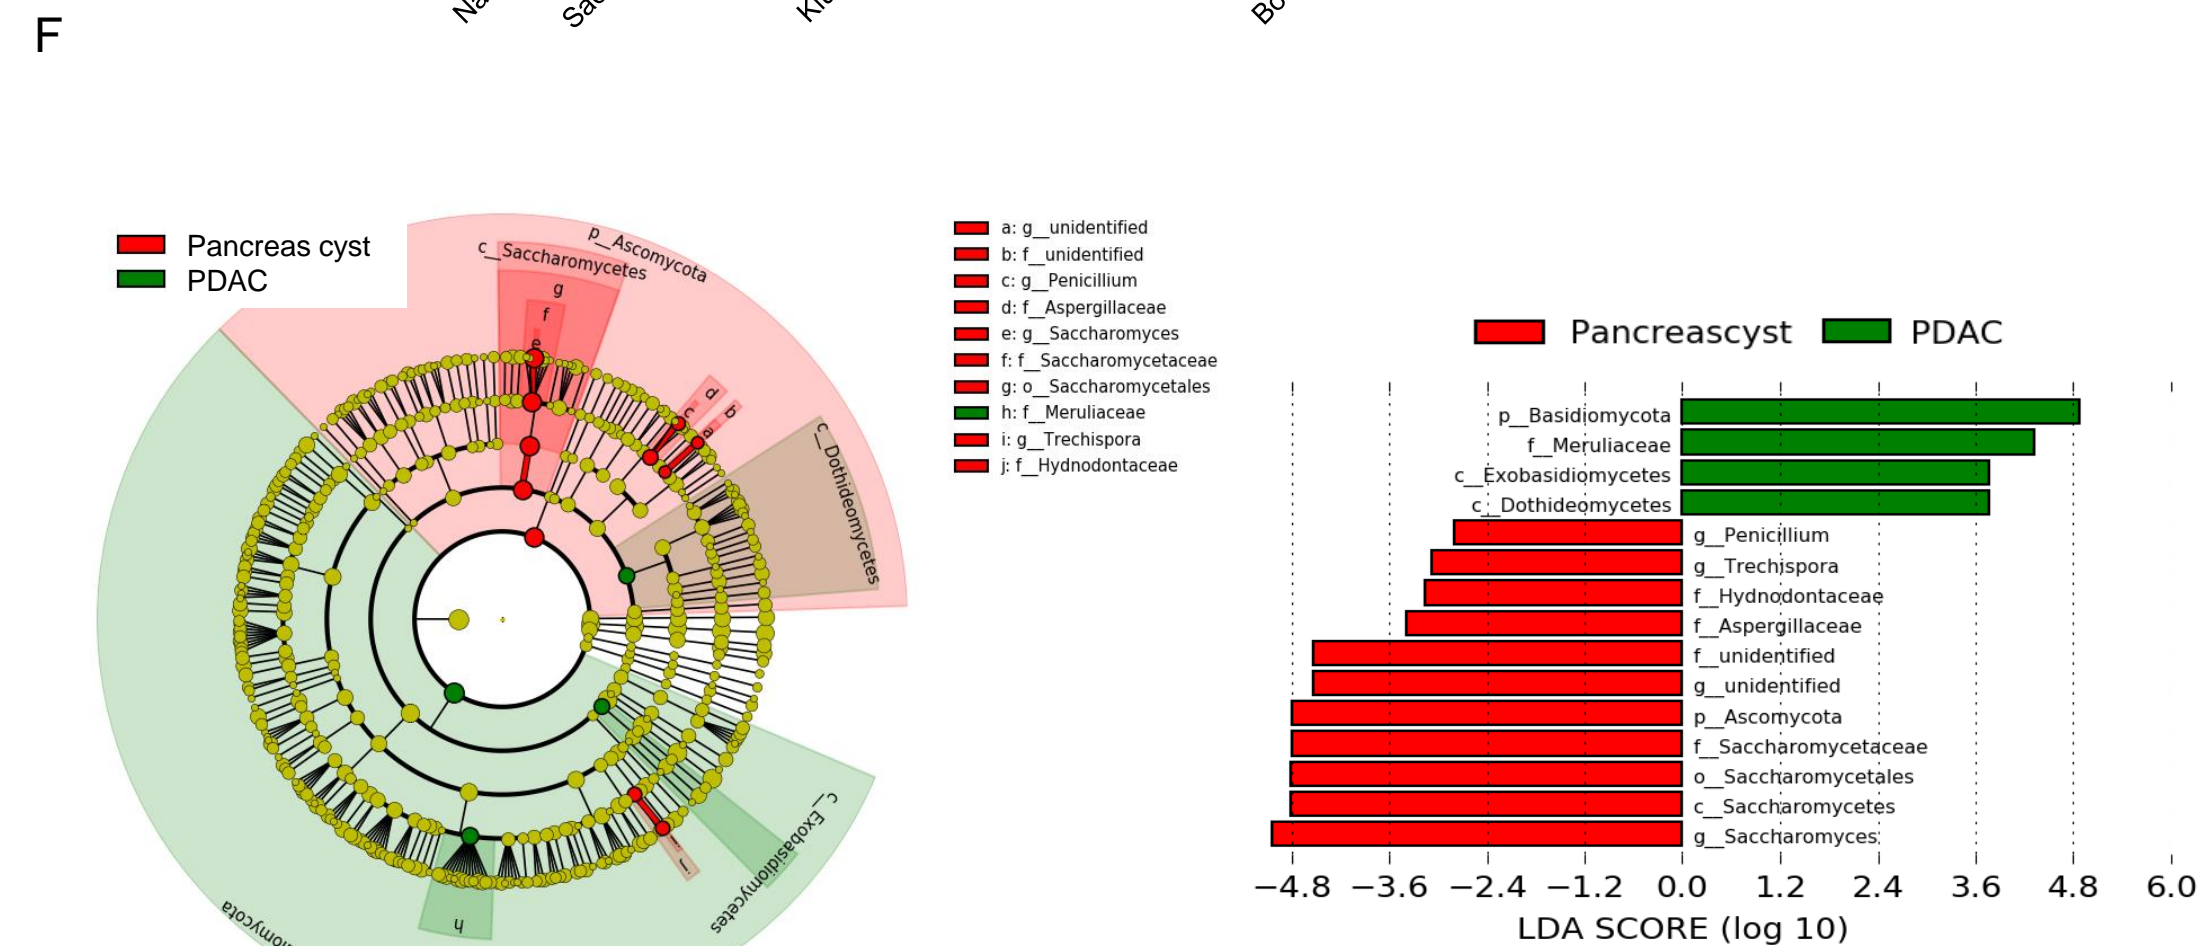

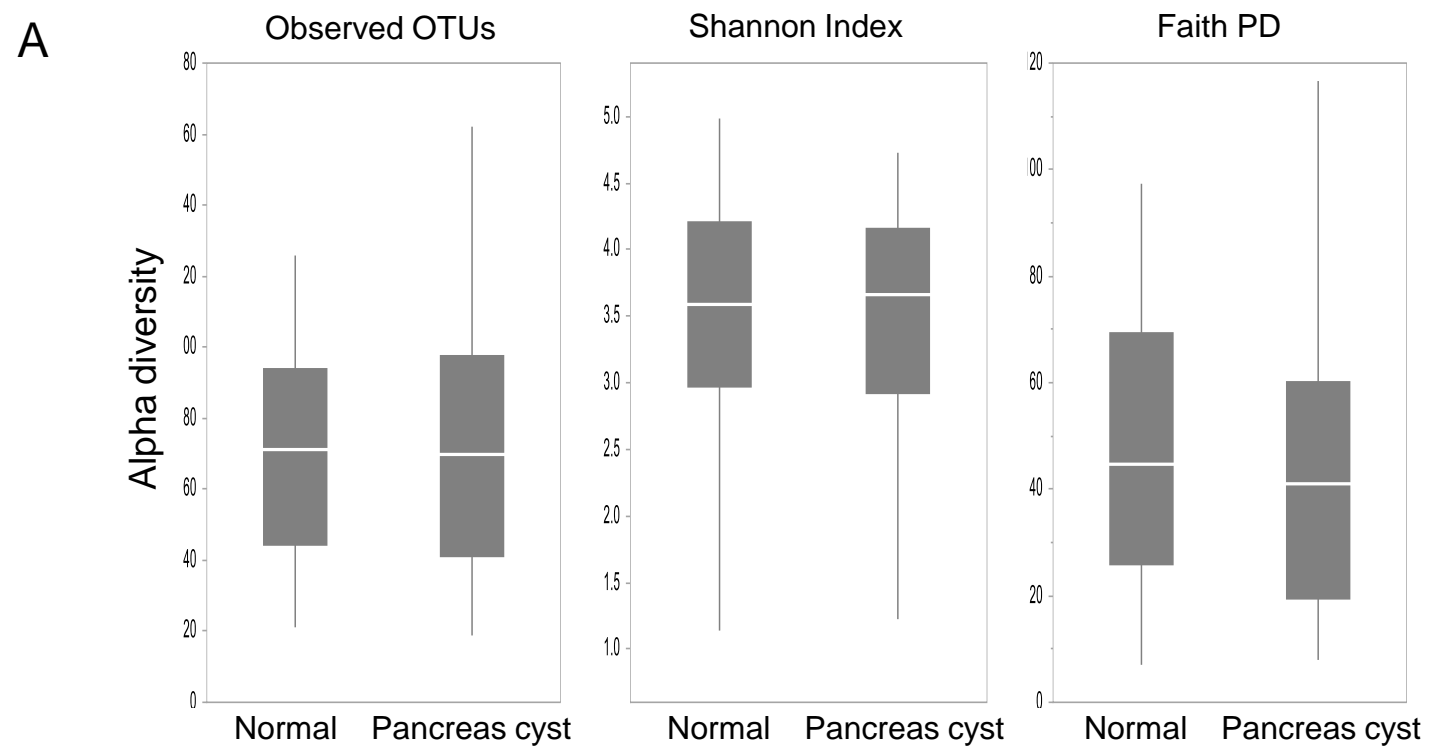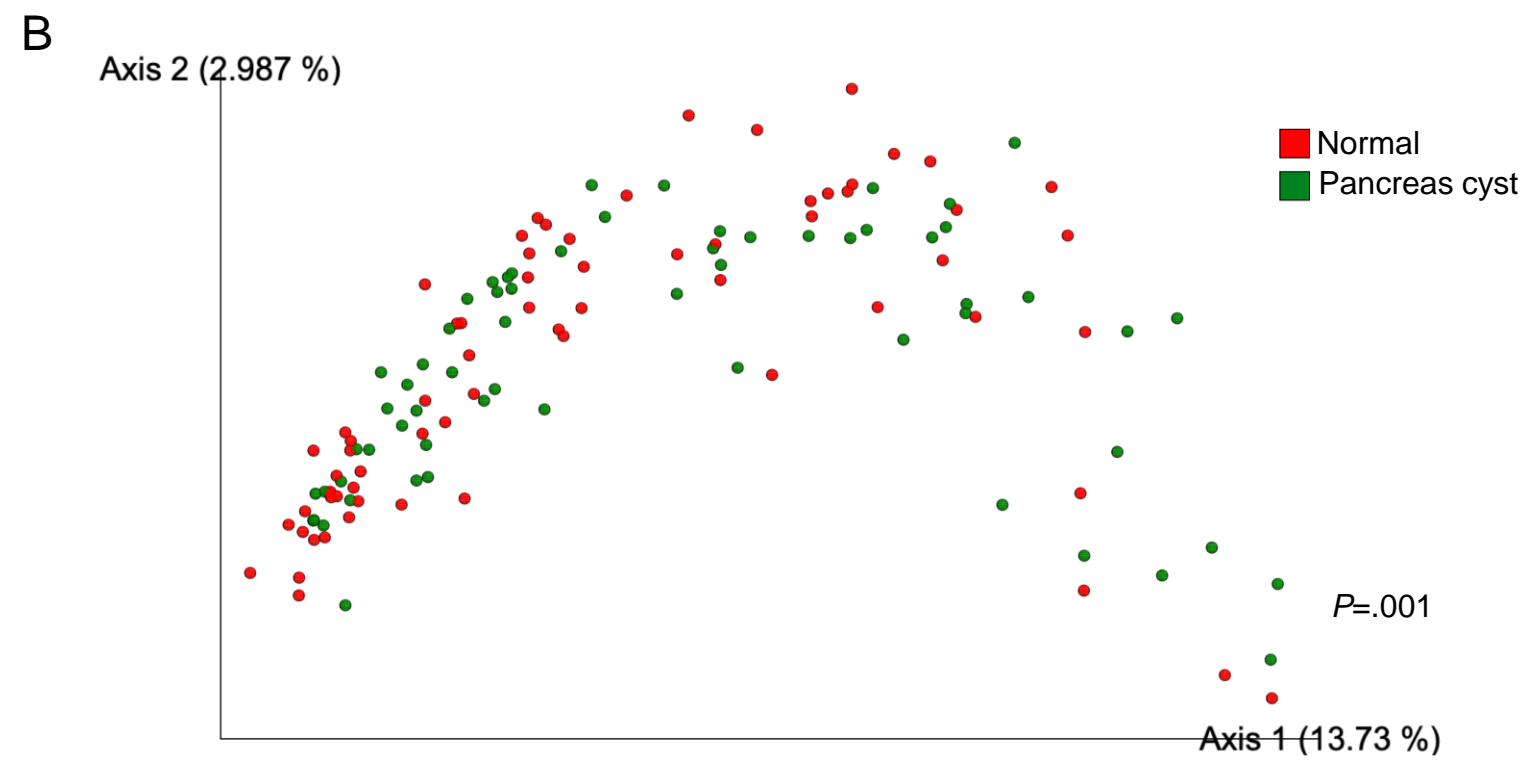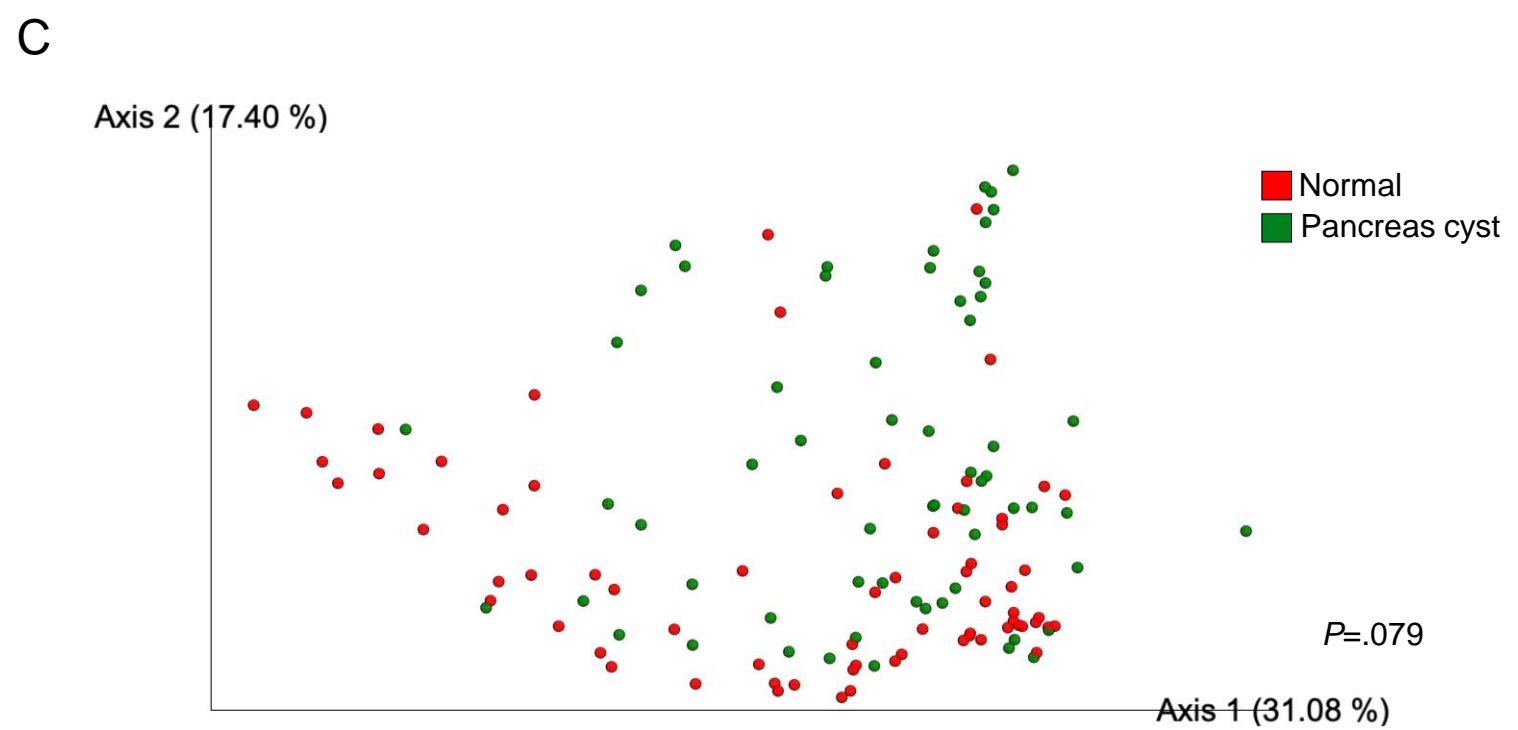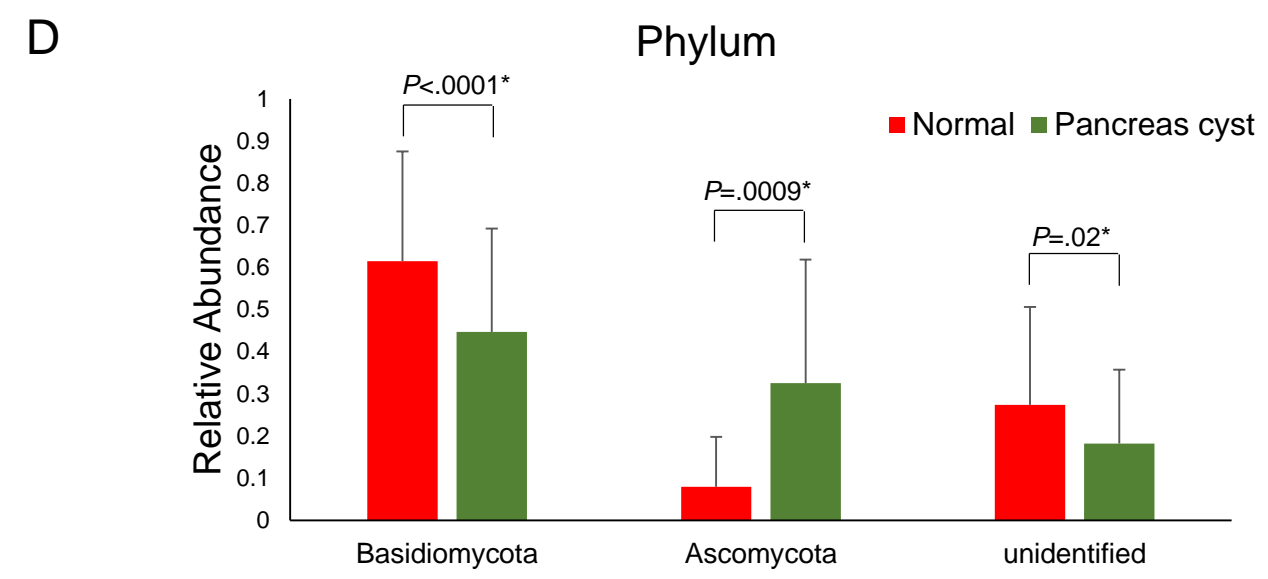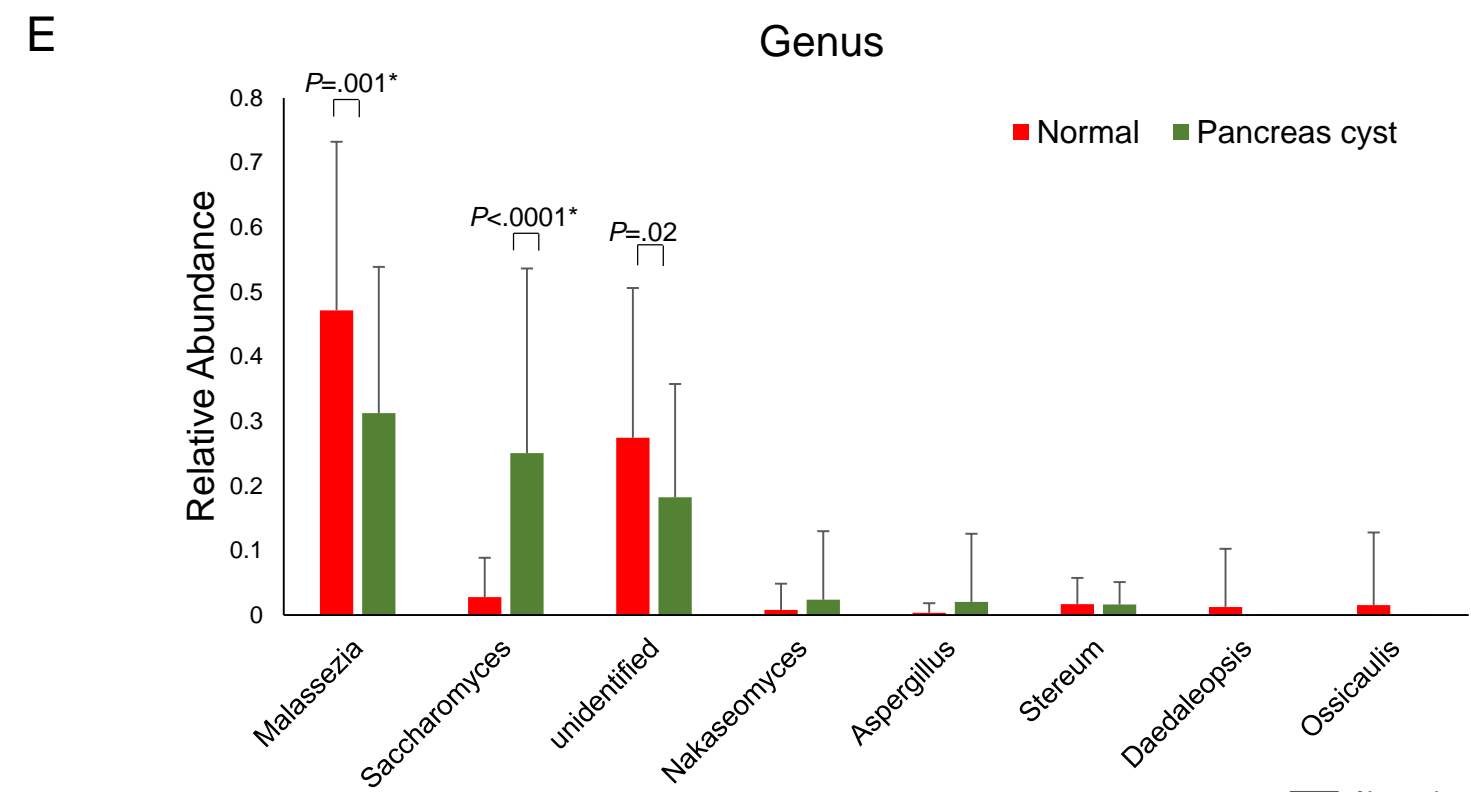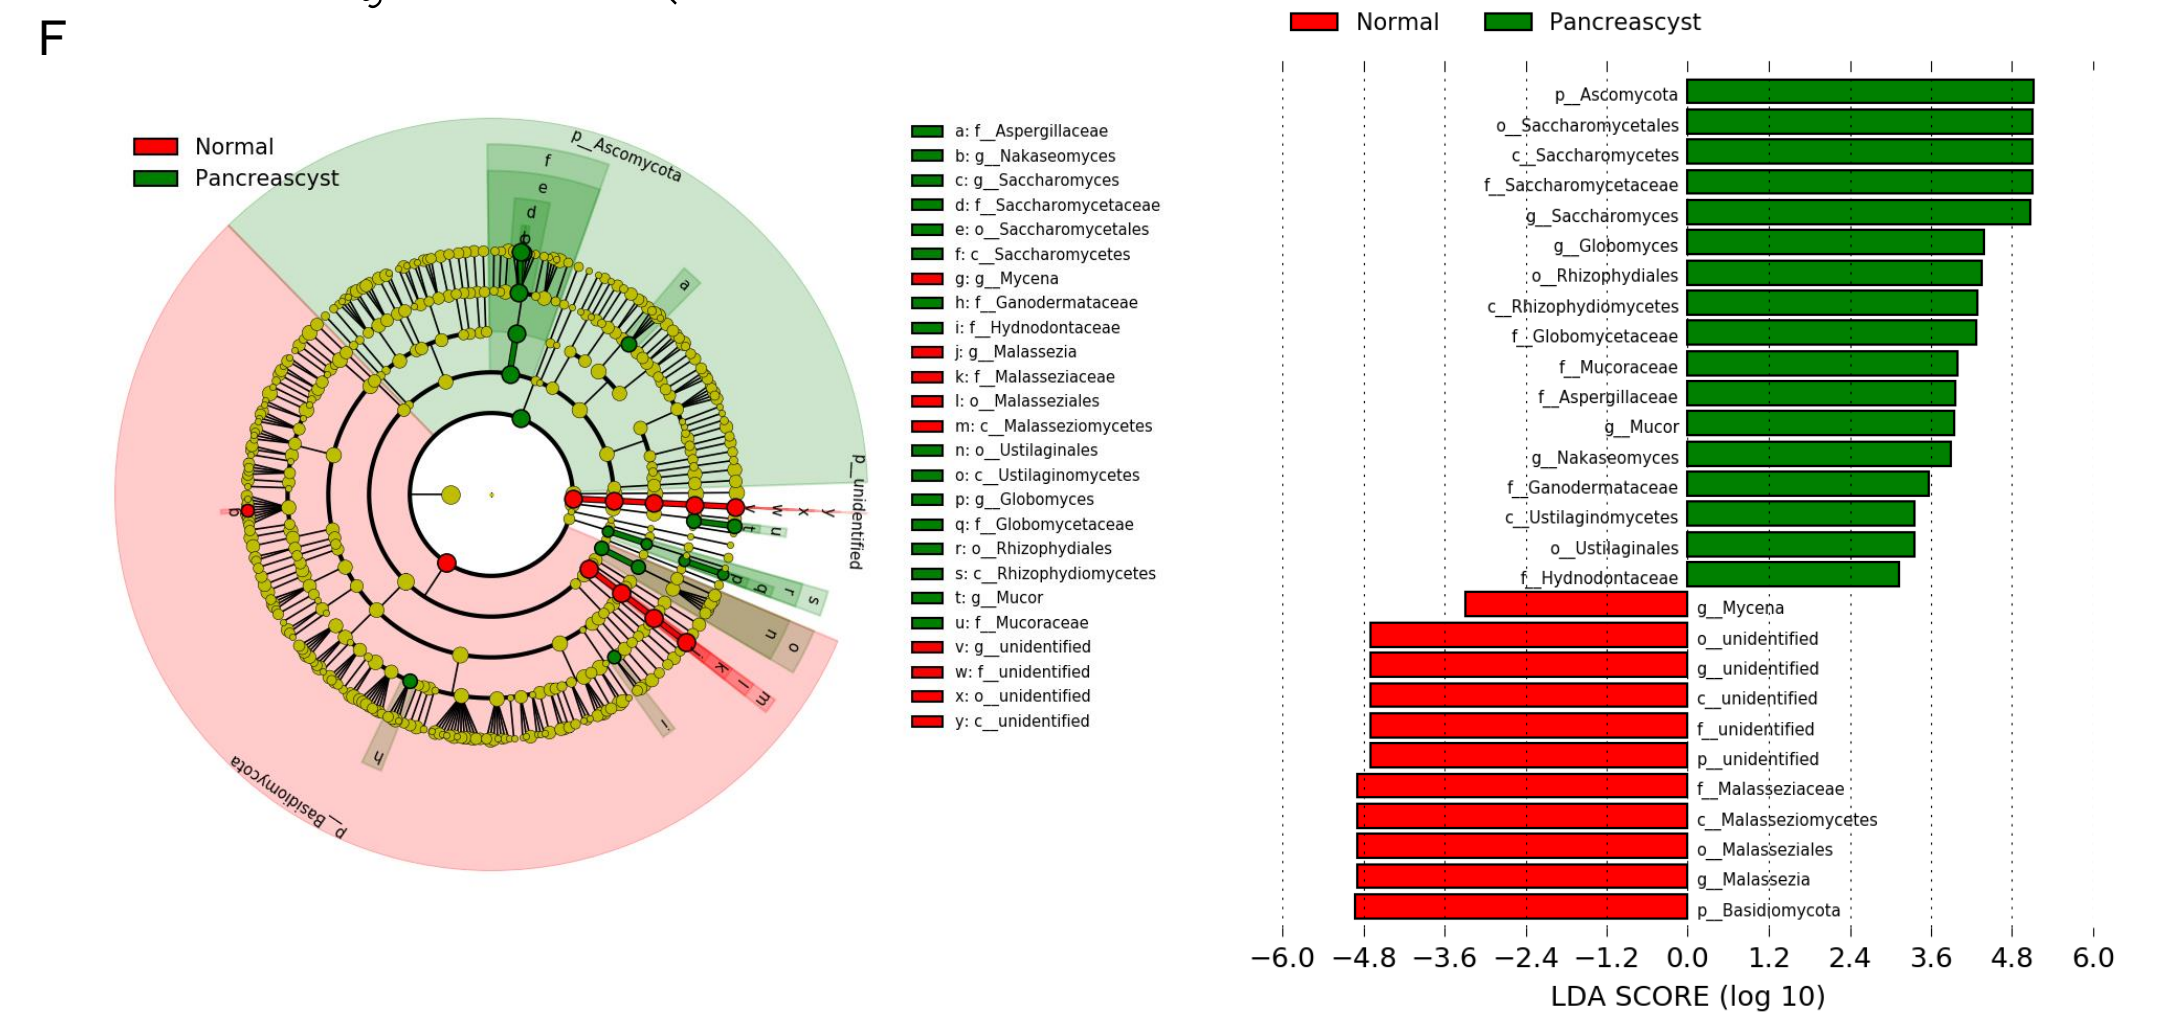

Genus

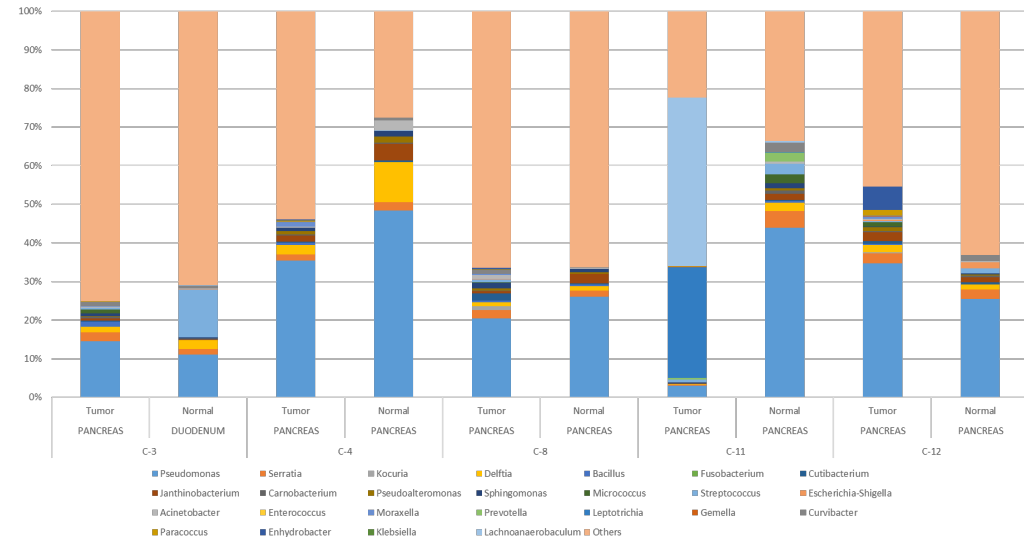

Genus

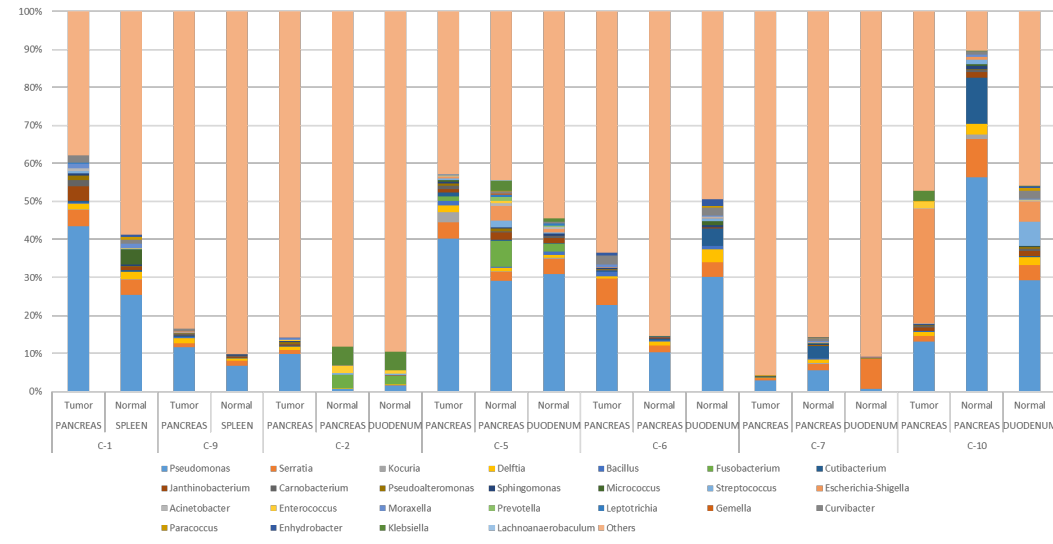

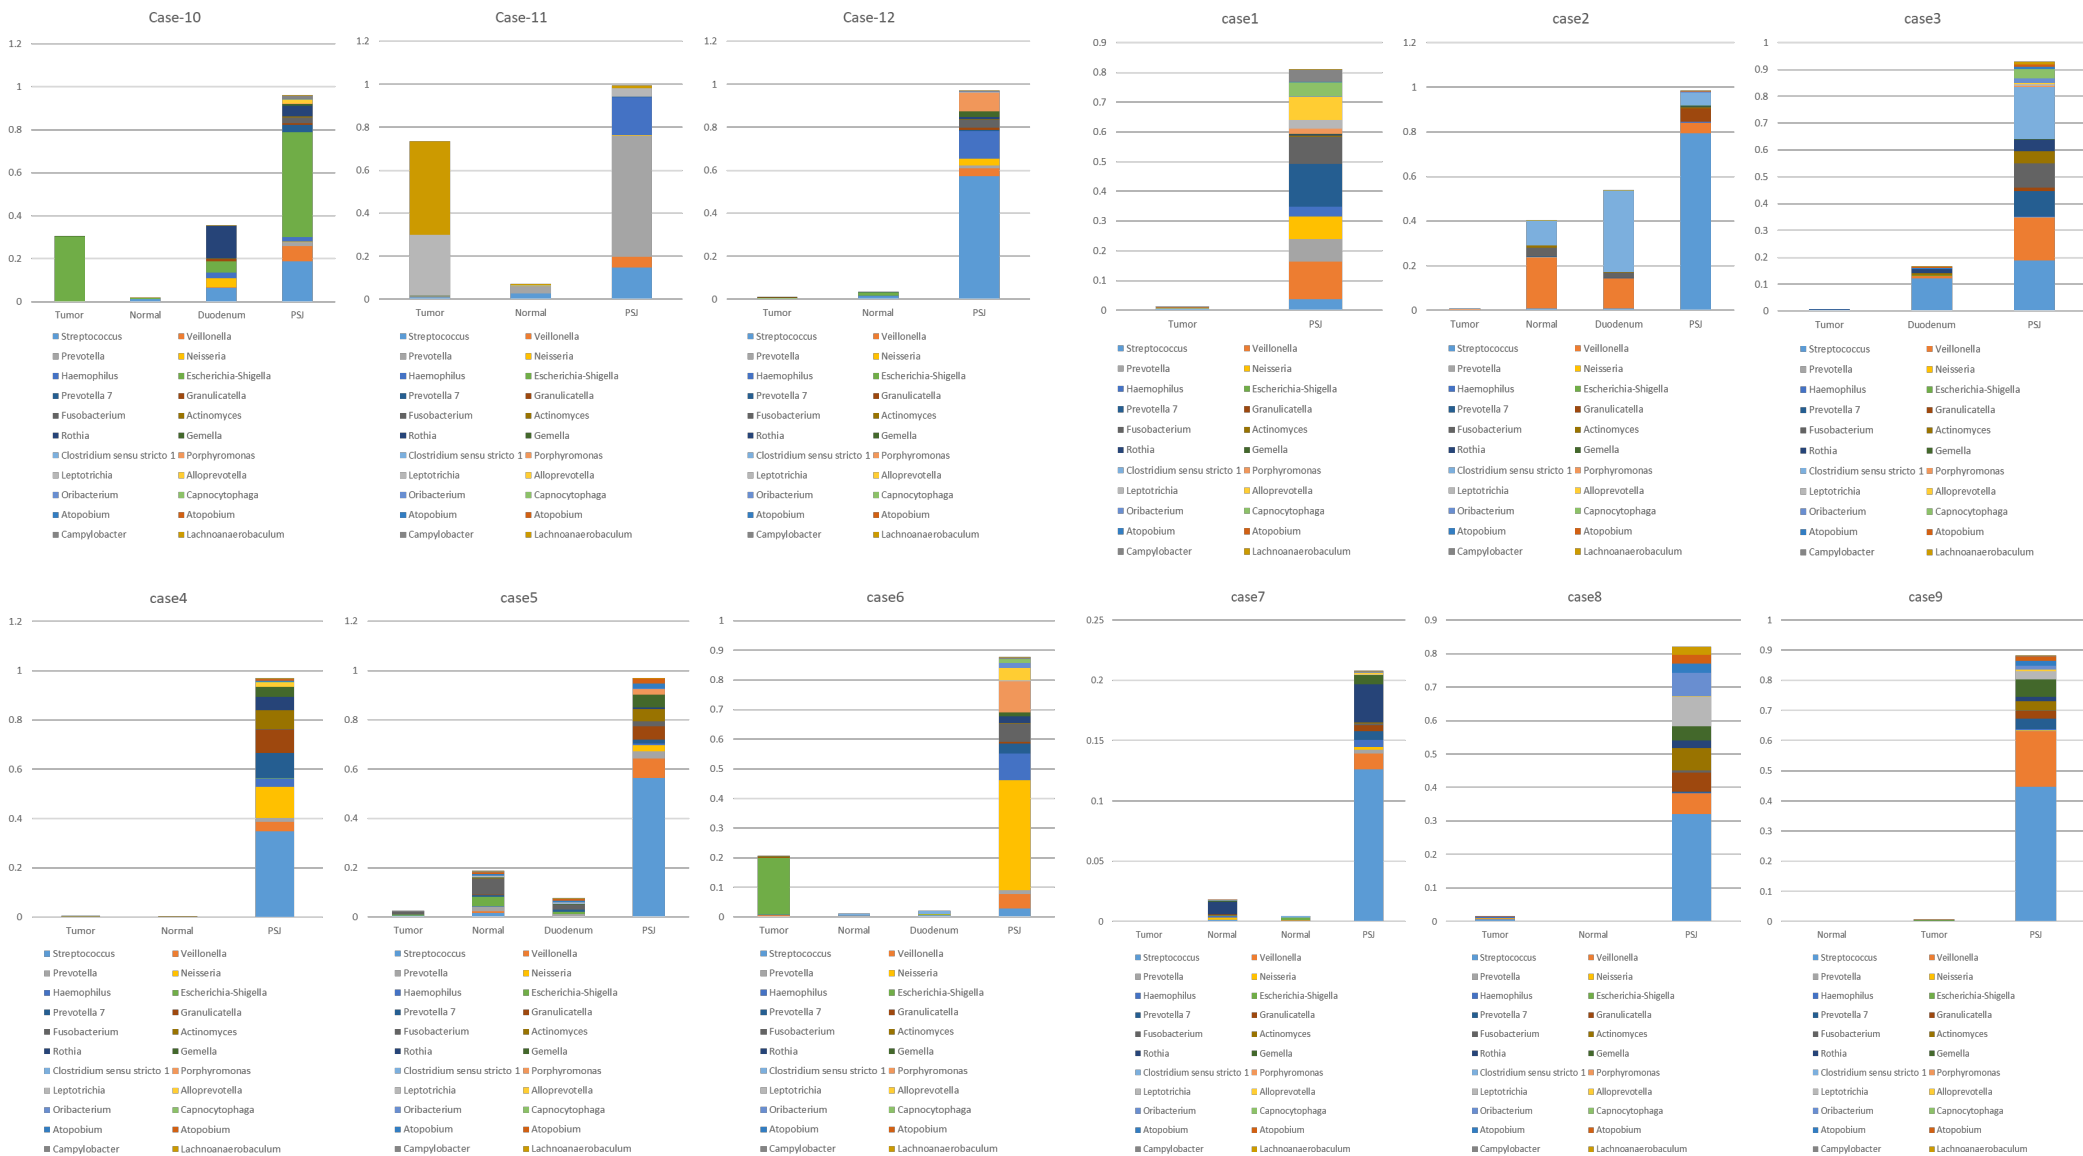



# Genus

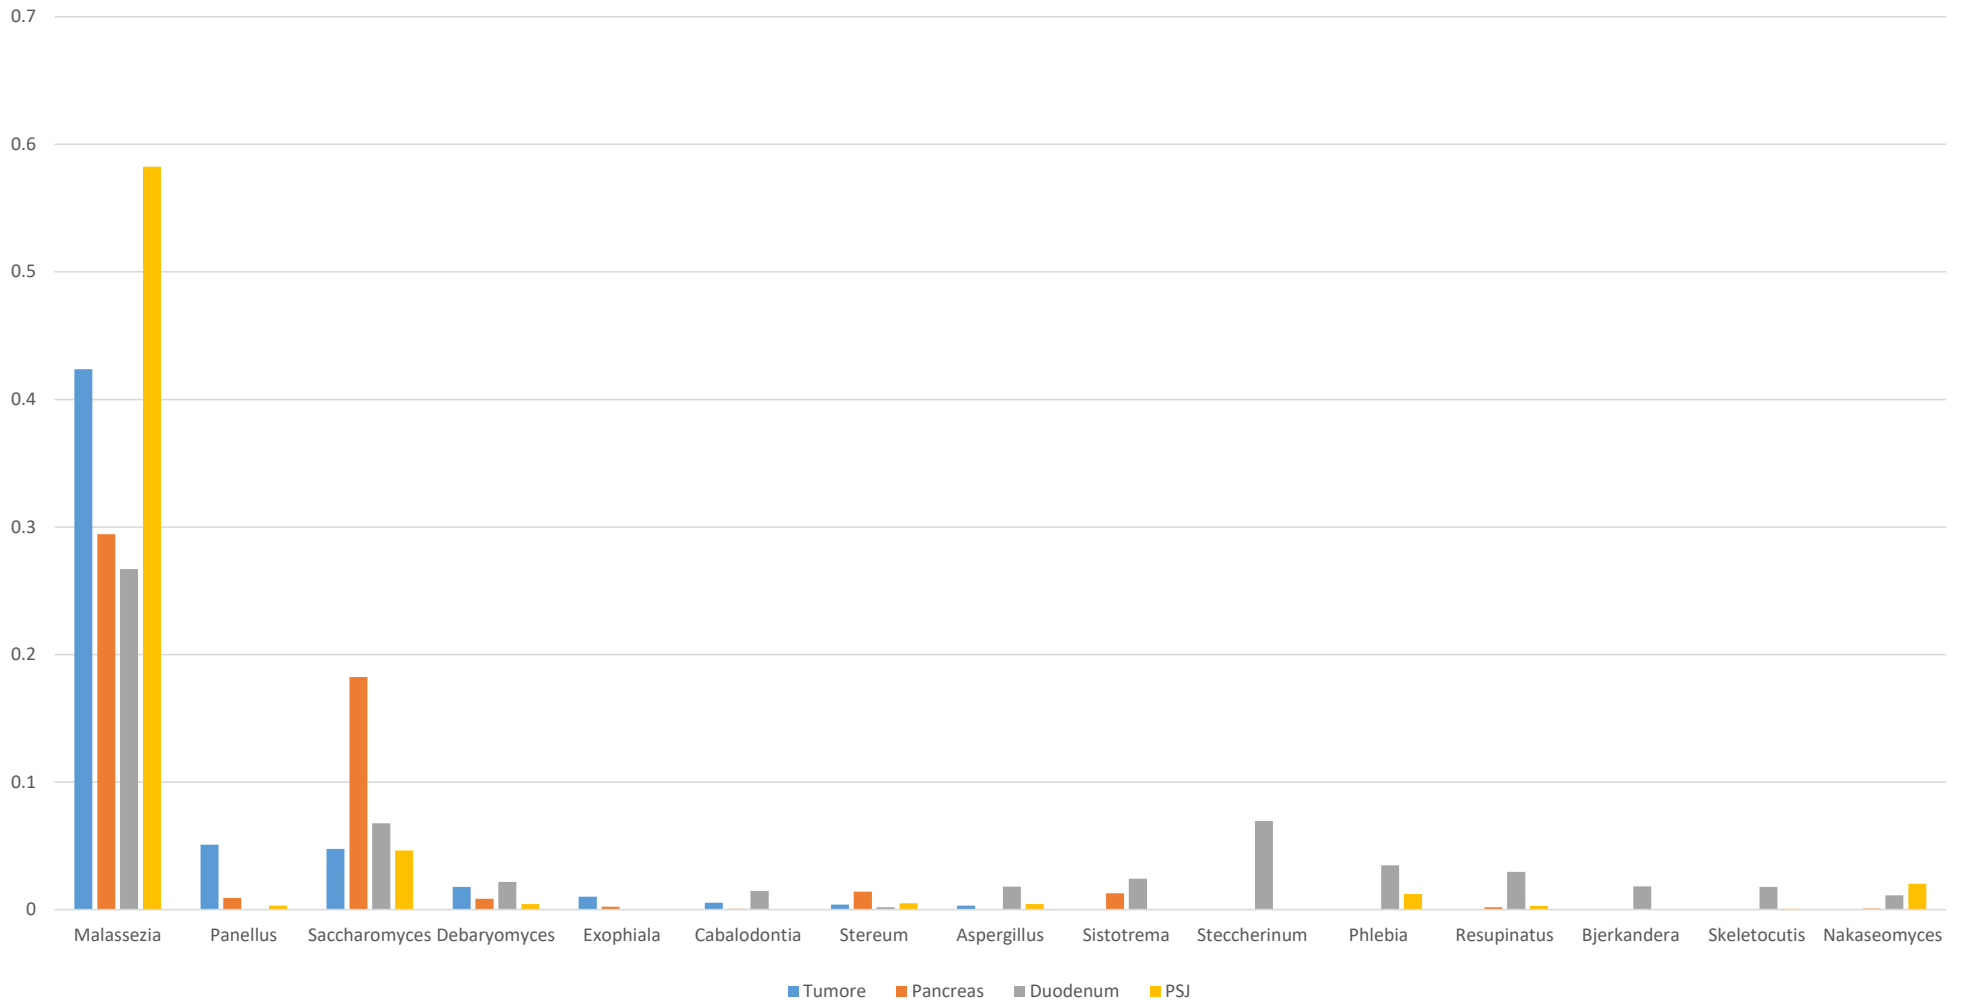

A

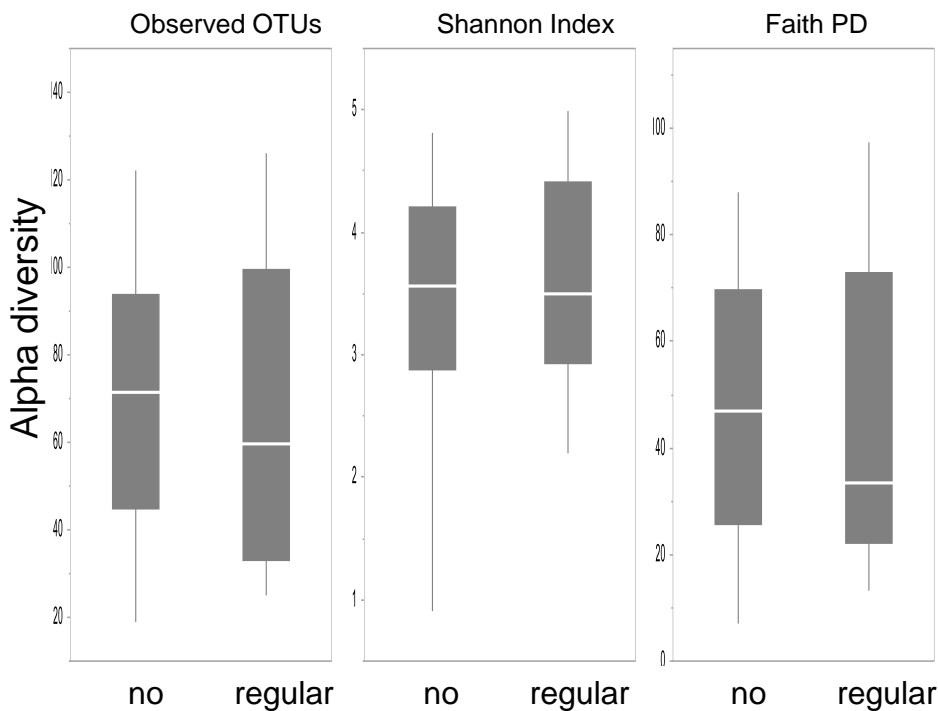

B

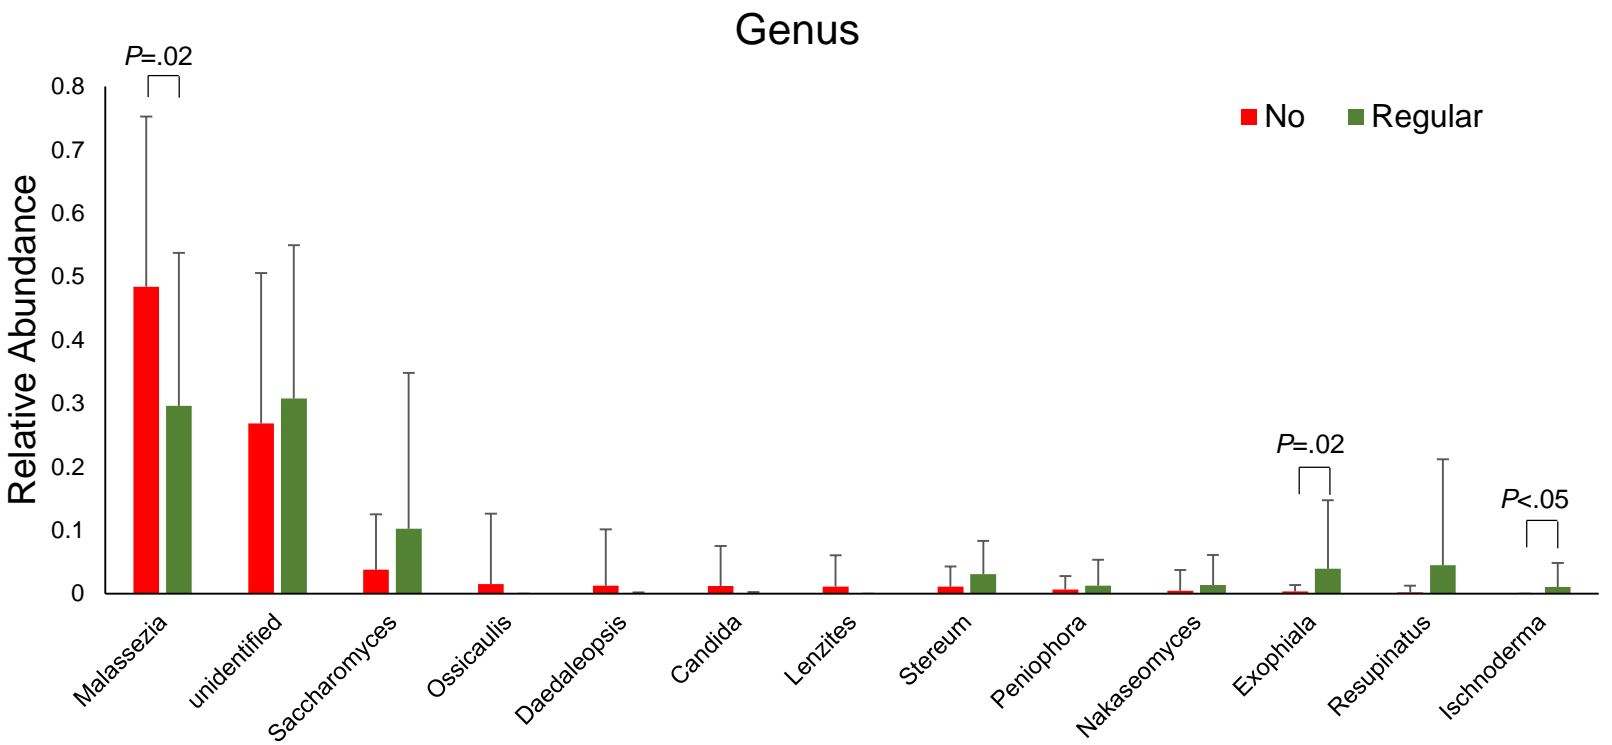

C

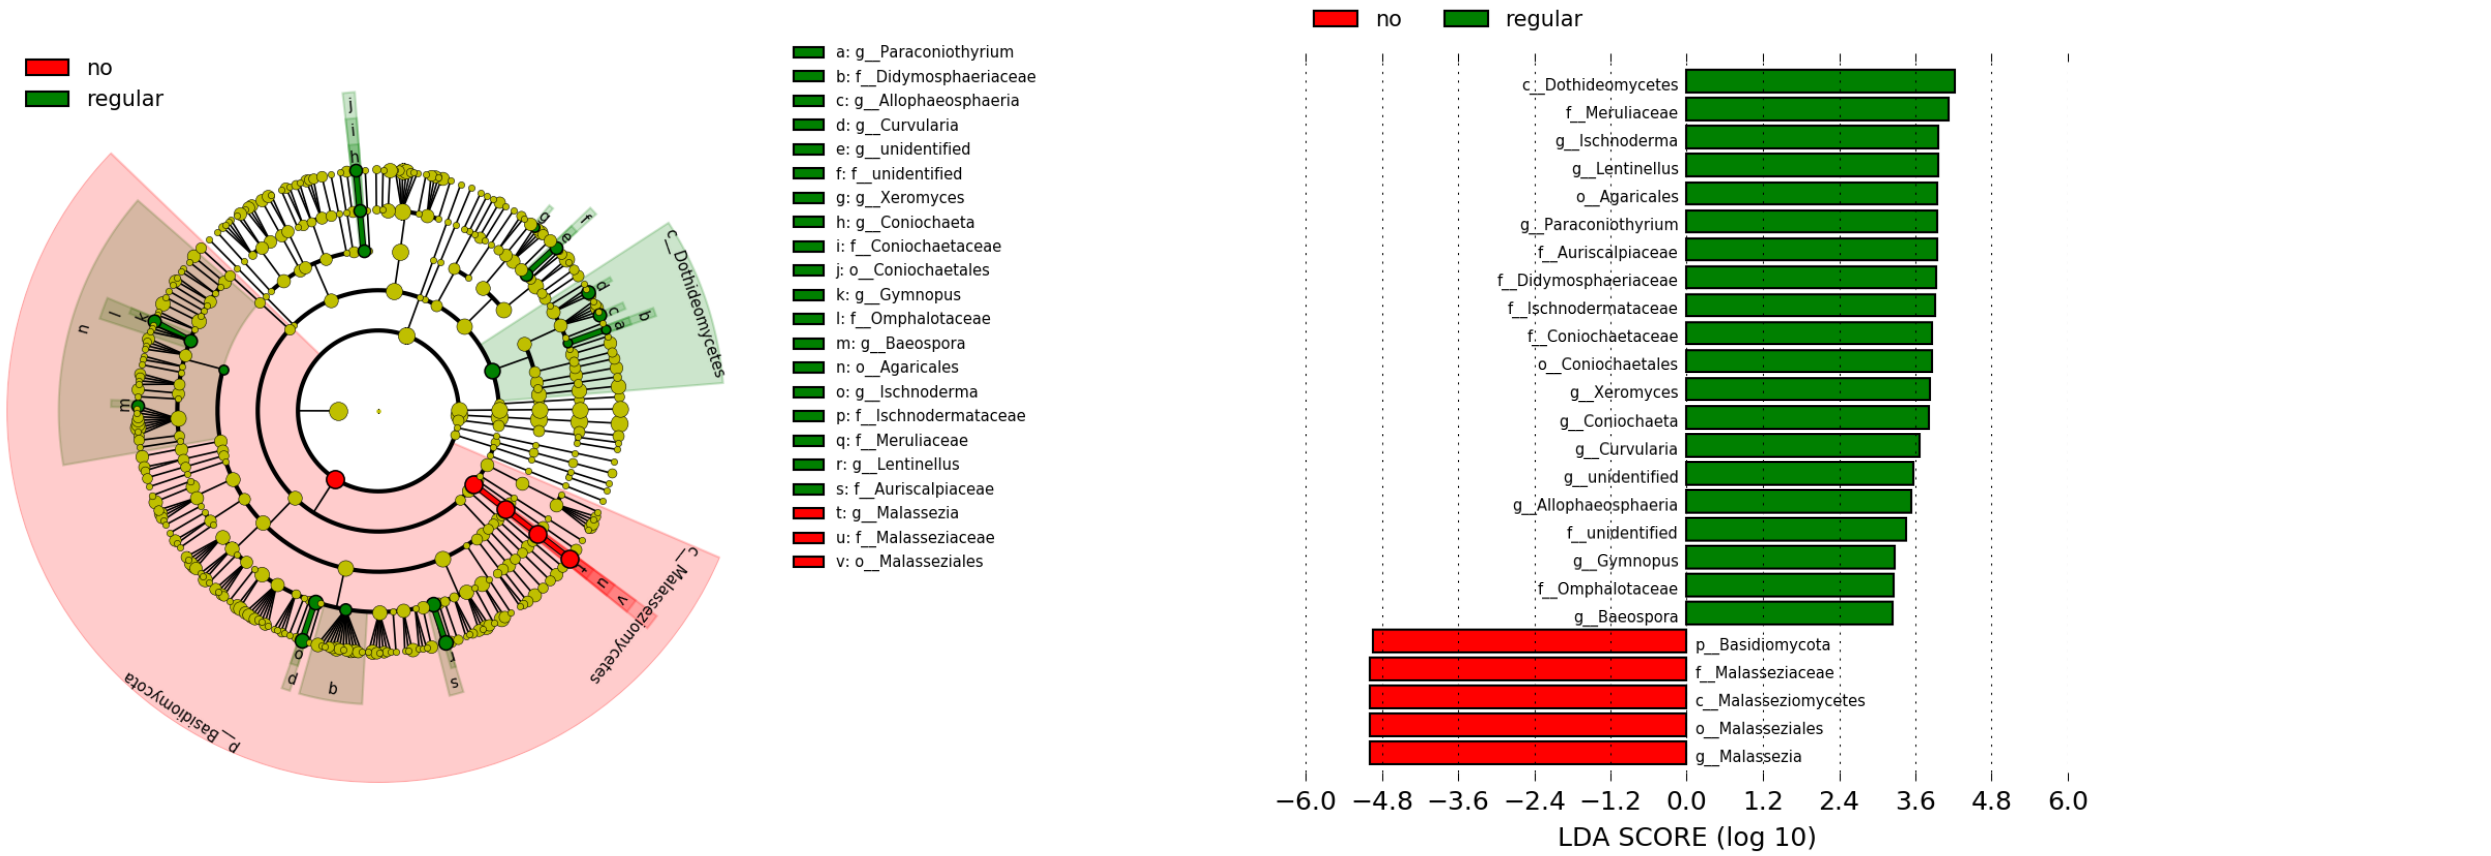



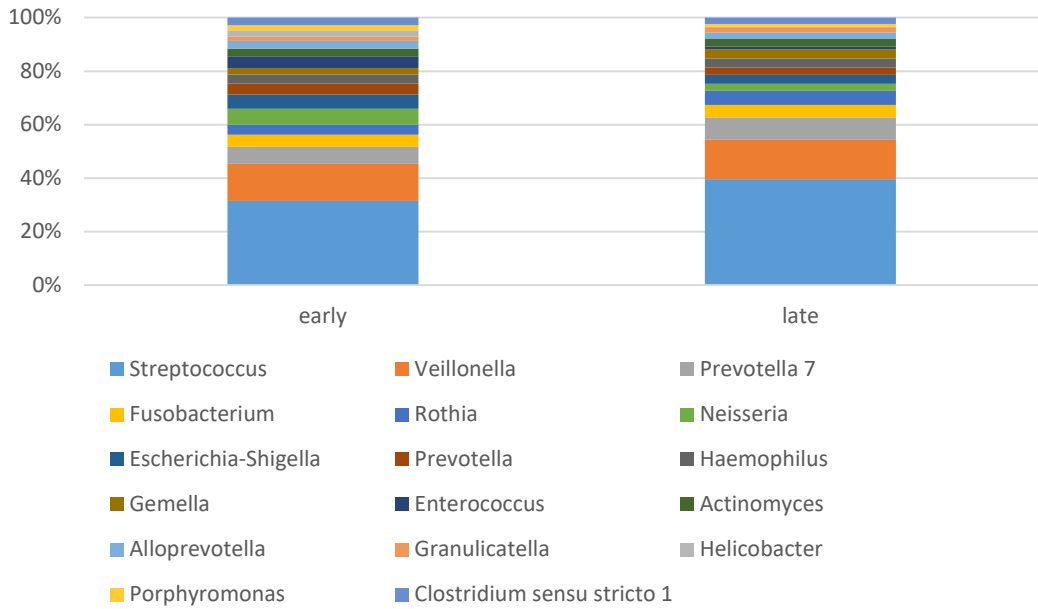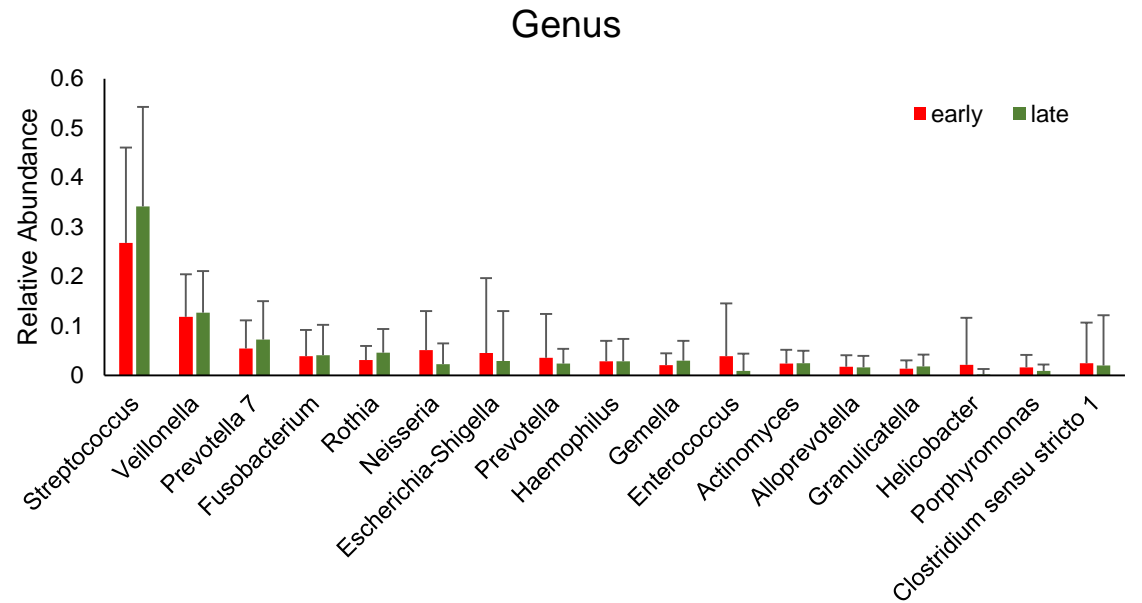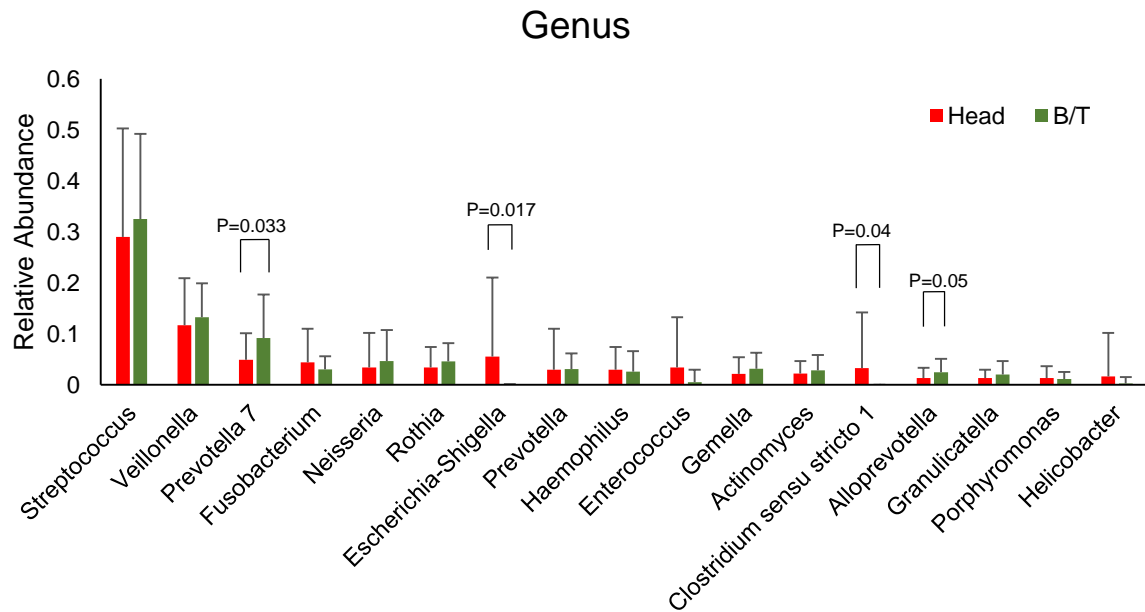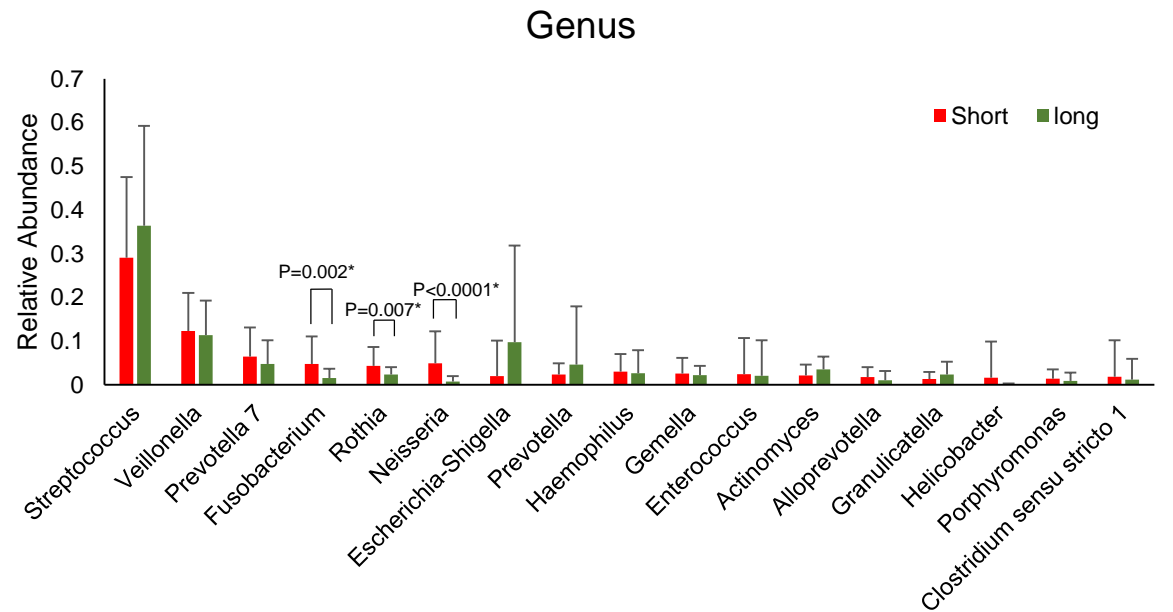

**A****Observed OTUs**  $P = .001^*$ 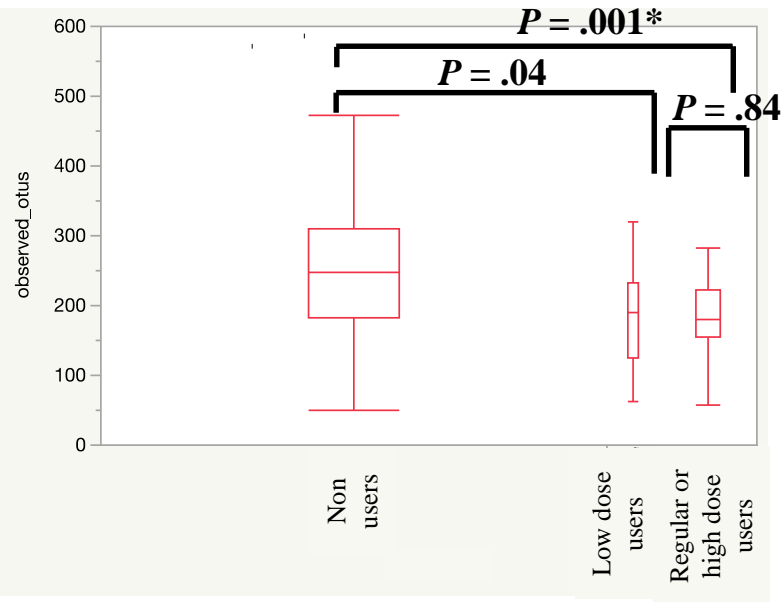**Shannon Index**  $P = .001^*$ 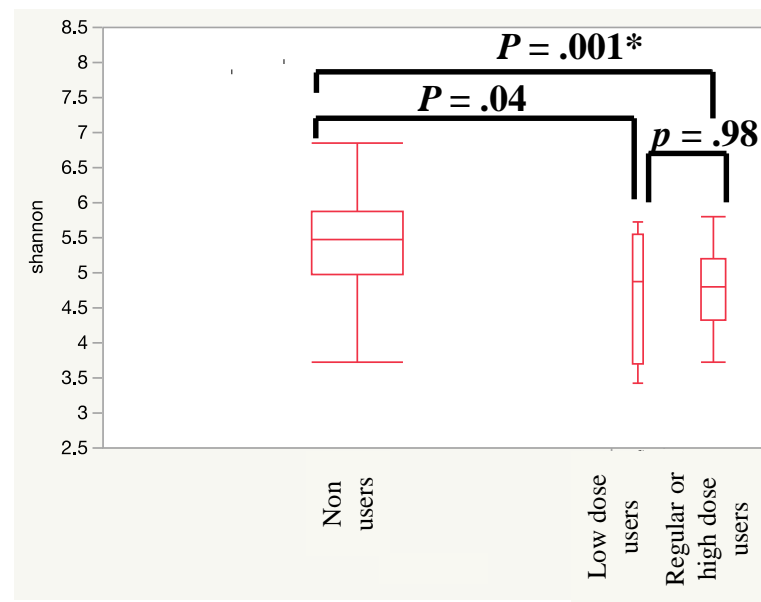**Faith PD**  $P = .06$ 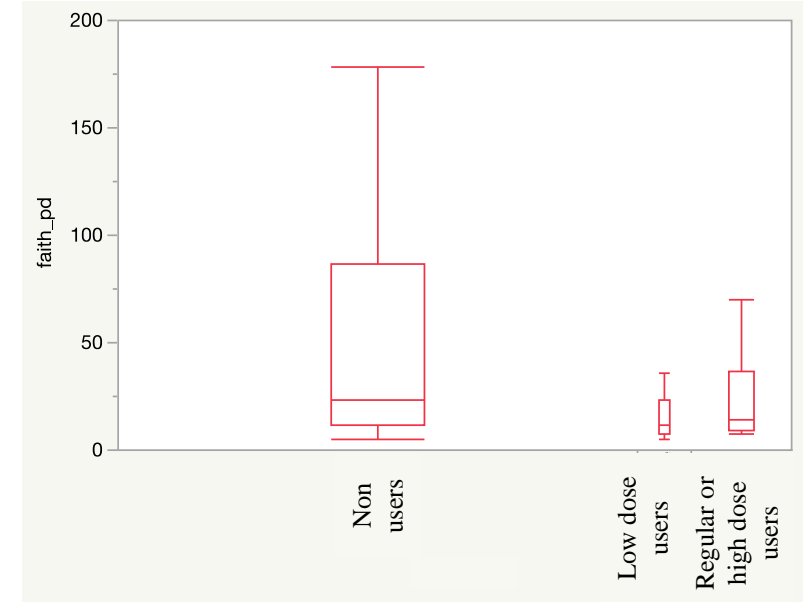**B****Observed OTUs**  $P = .78$ 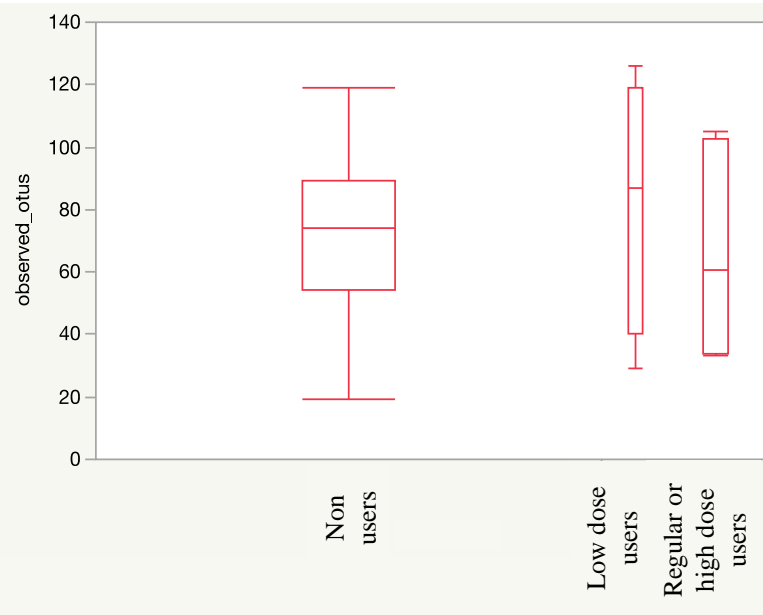**Shannon Index**  $P = .88$ 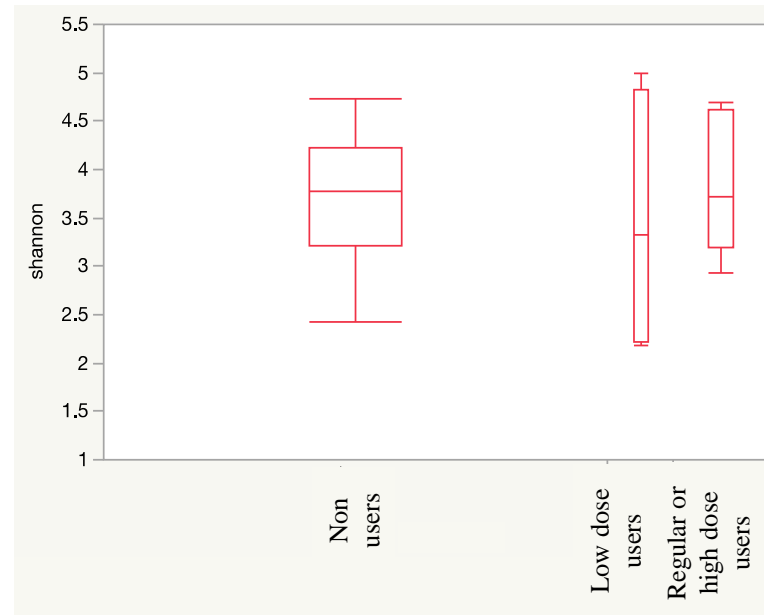**Faith PD**  $P = .83$ 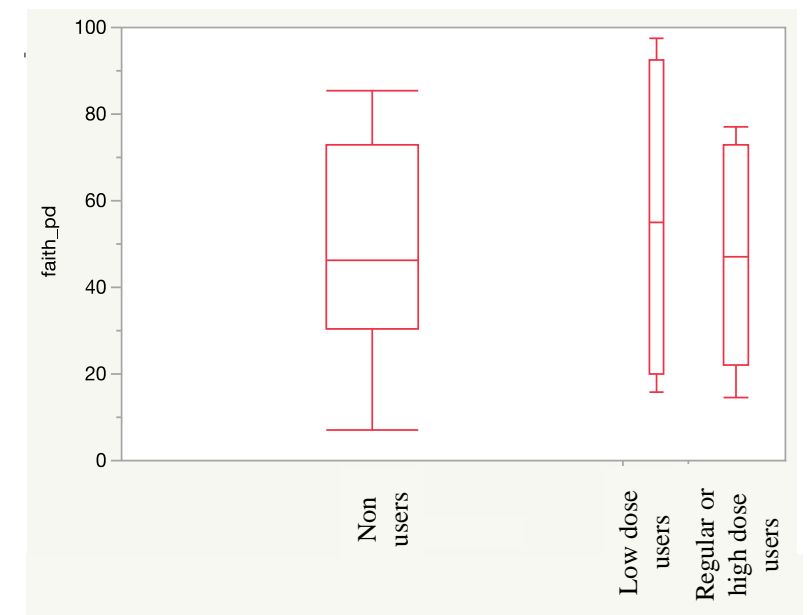

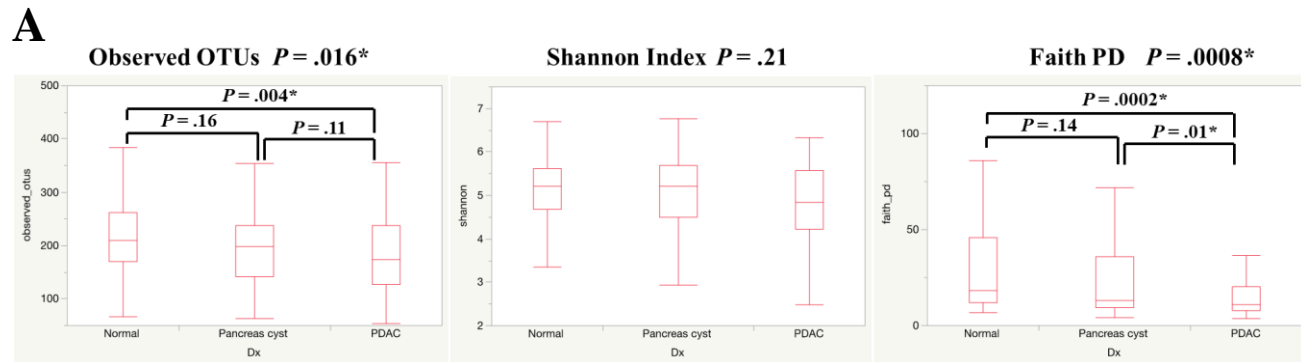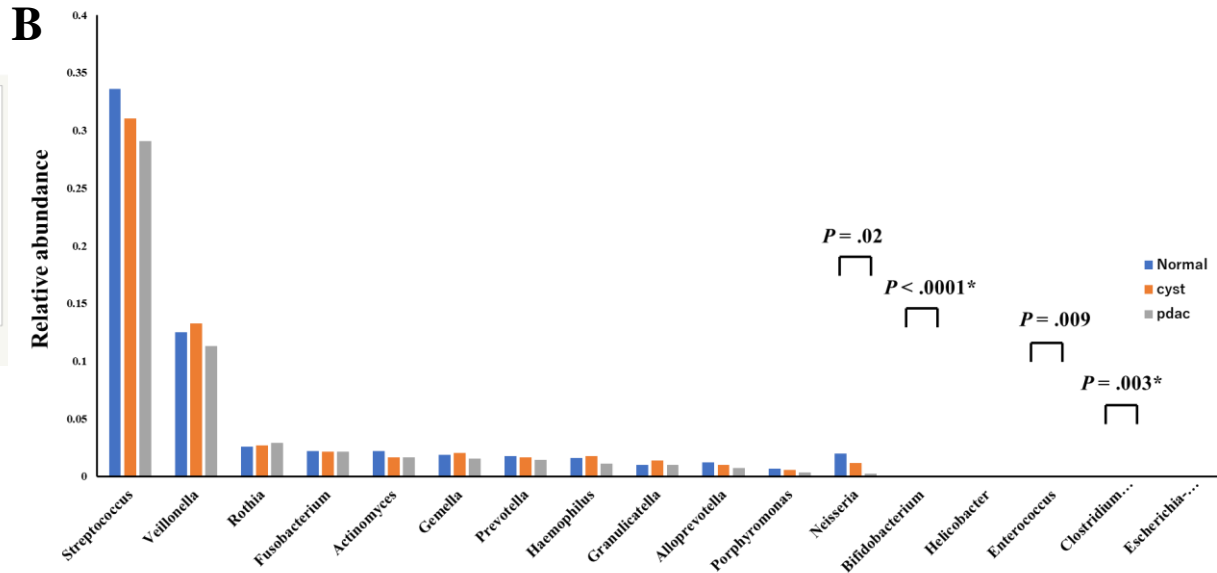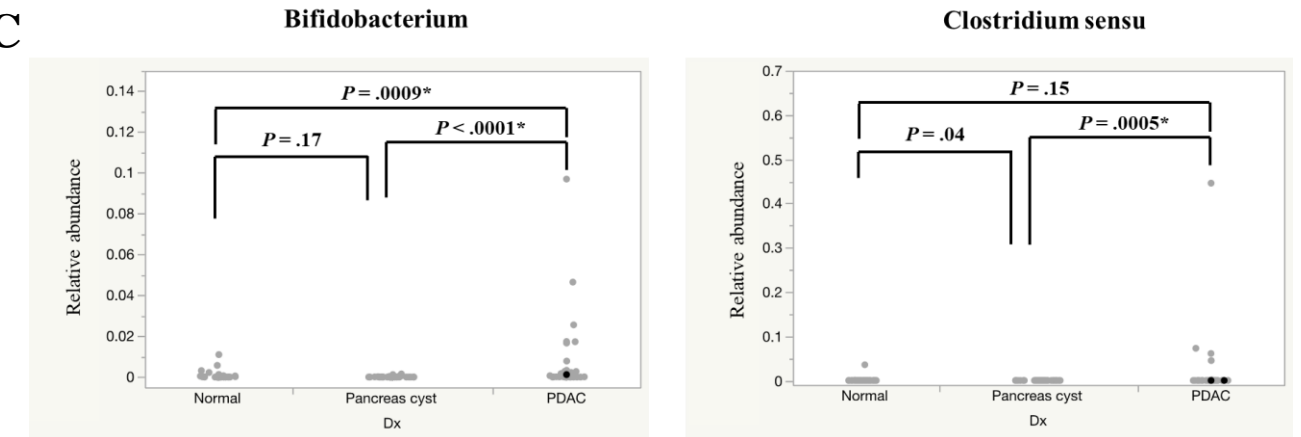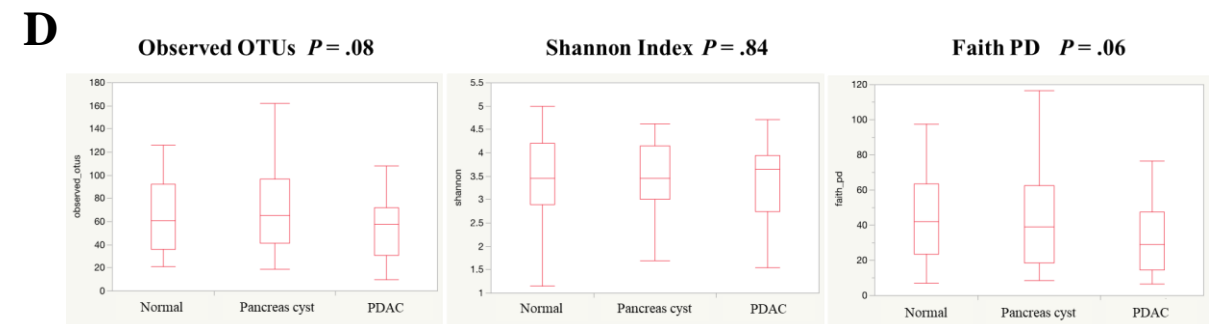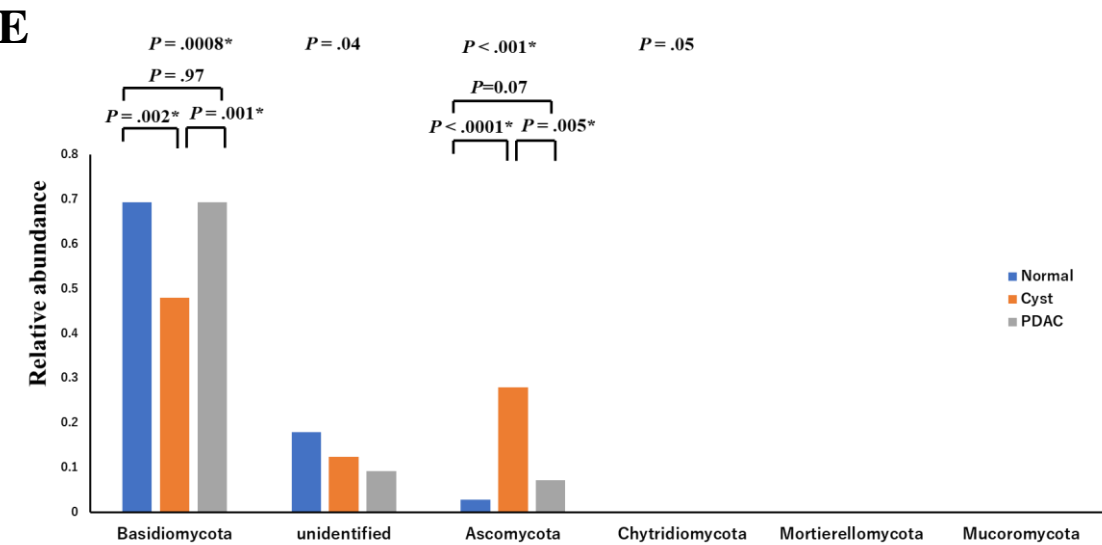

**A**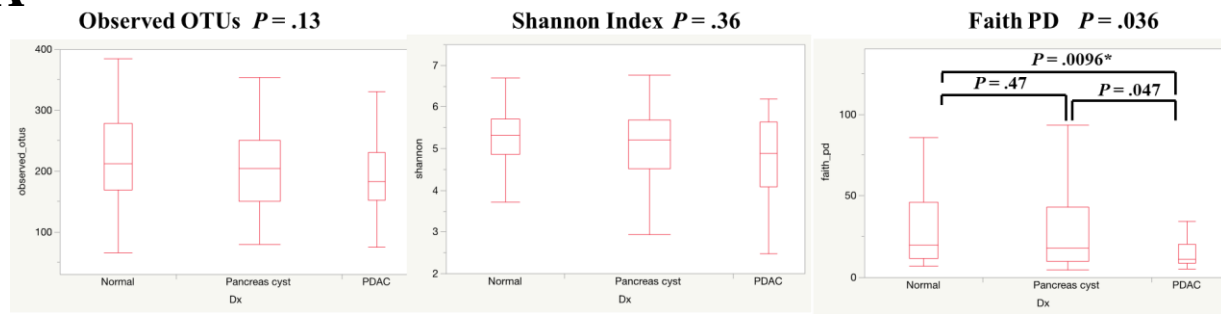**B**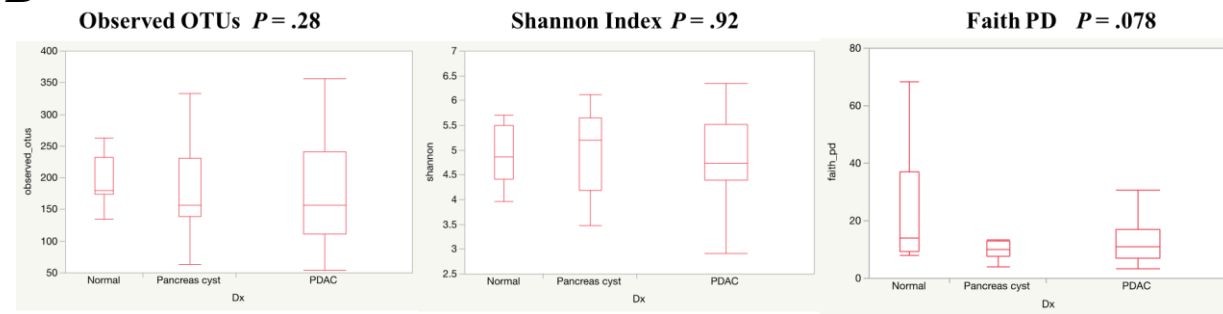**C**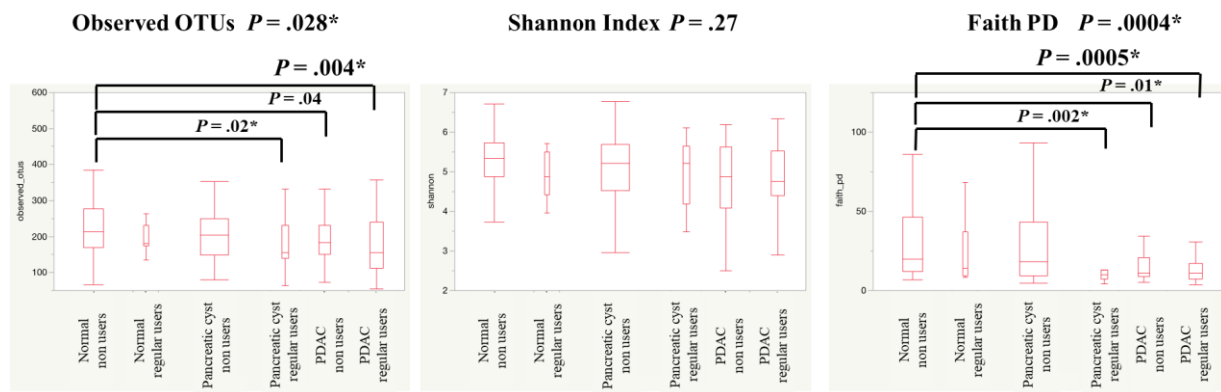**D**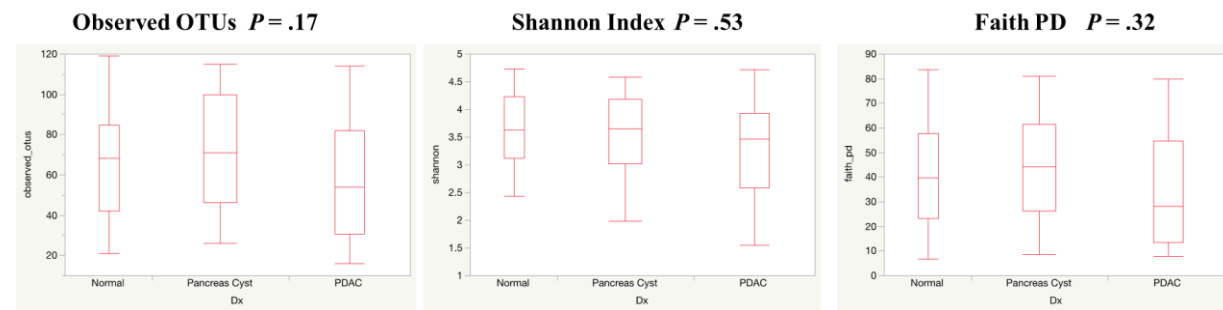**E**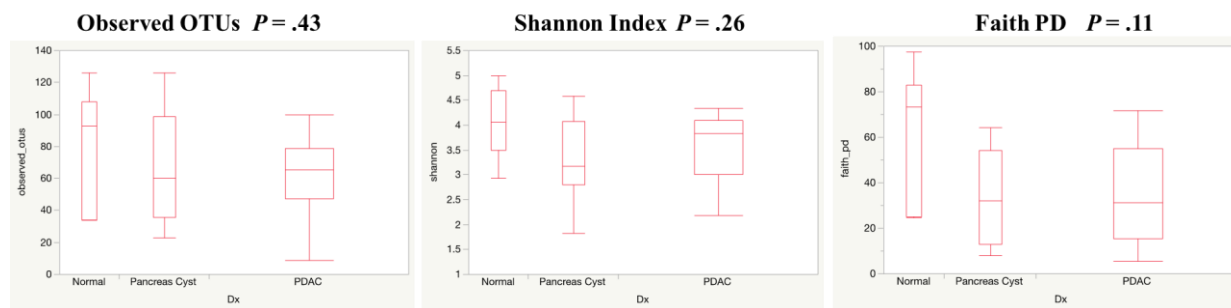**F**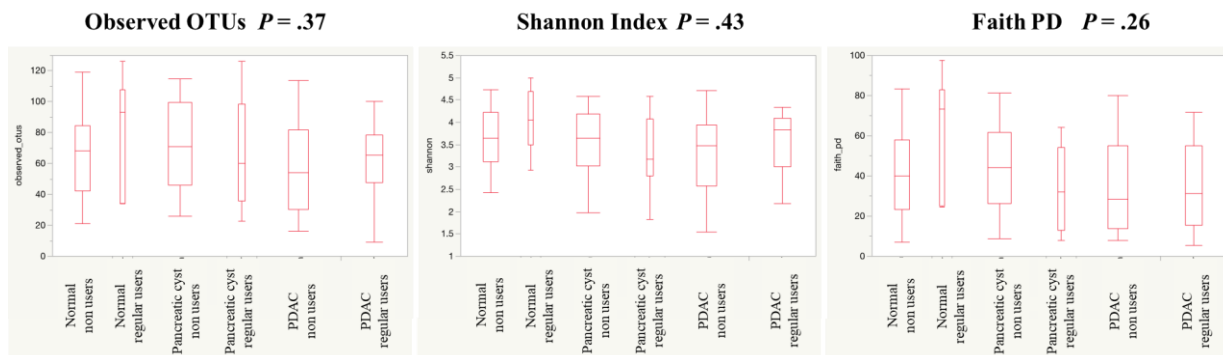

**A****Observed OTUs**  $P = .025^*$ 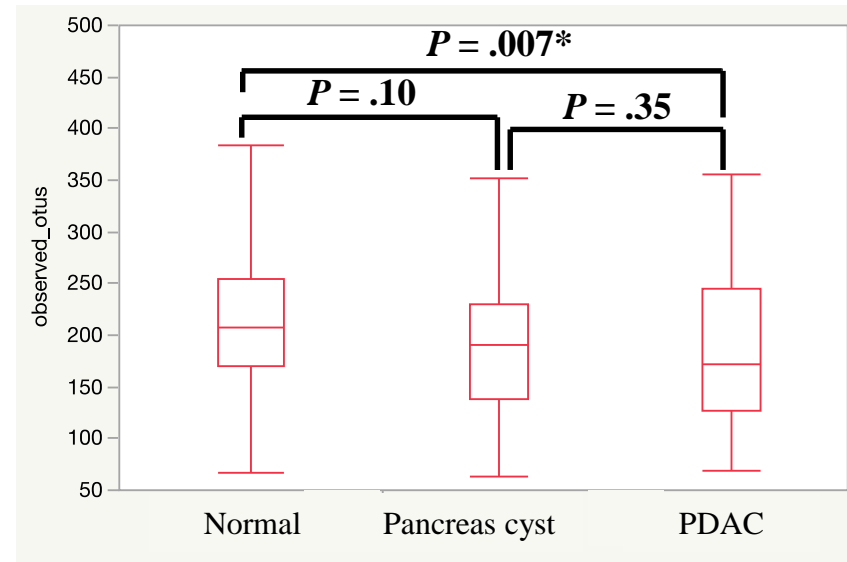**Shannon Index**  $P = .23$ 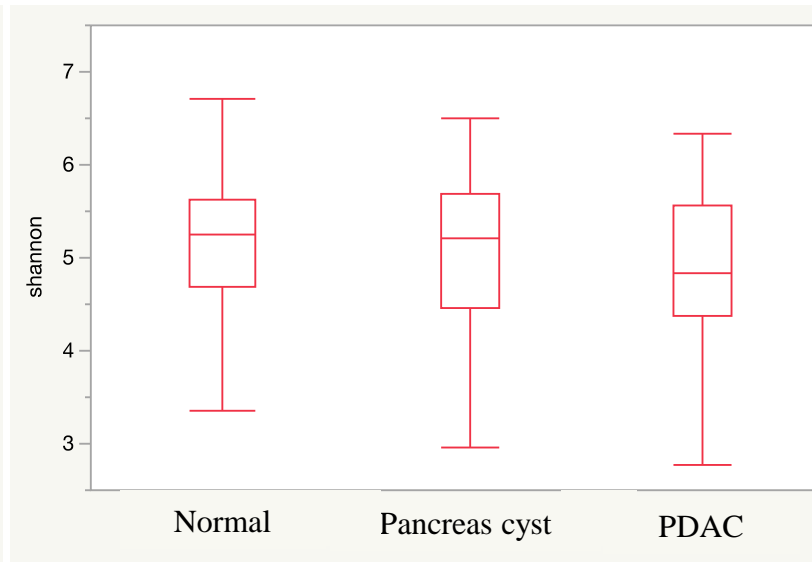**Faith PD**  $P = .004^*$ 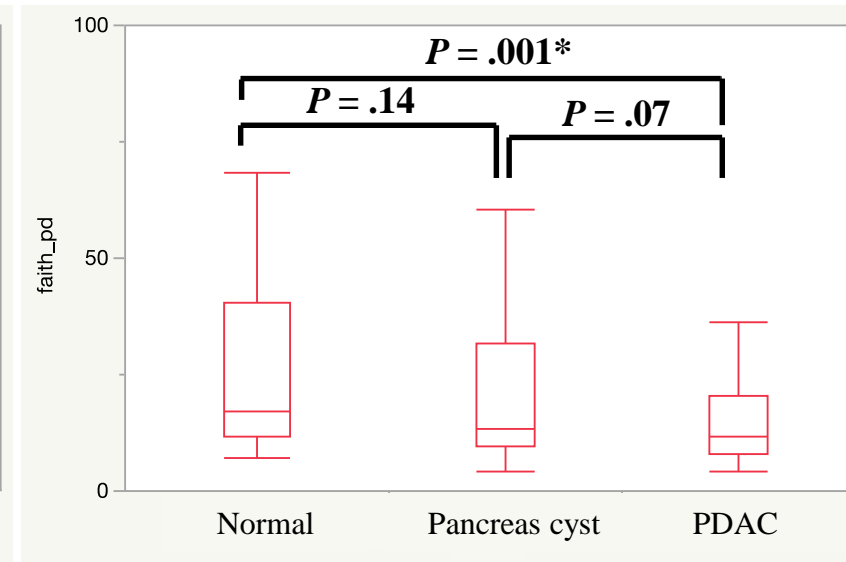**B****Observed OTUs**  $P = .21$ 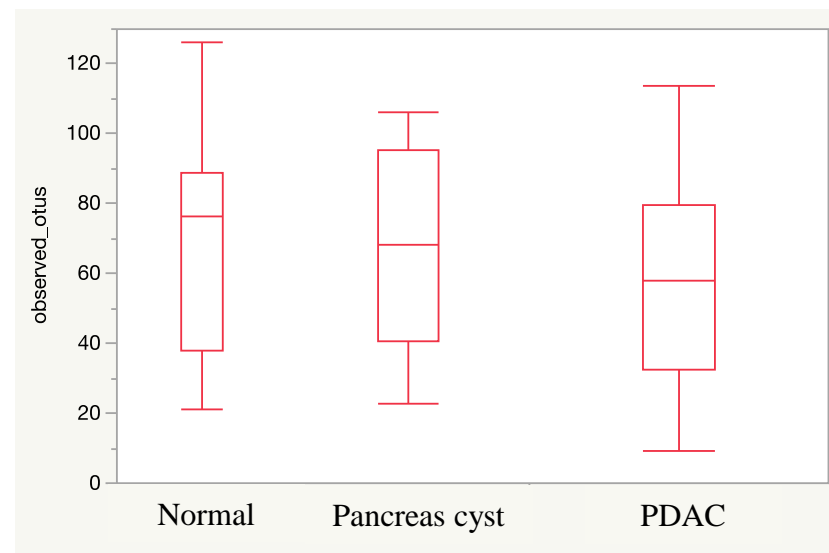**Shannon Index**  $P = .41$ 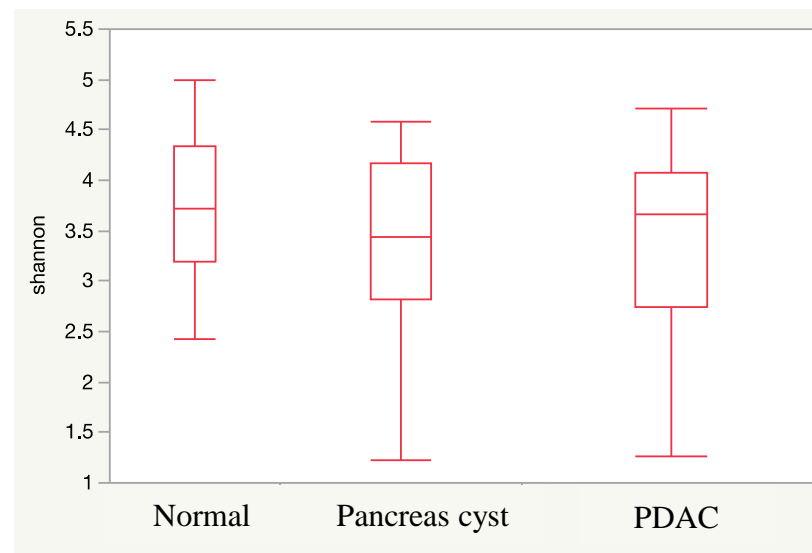**Faith PD**  $P = .21$ 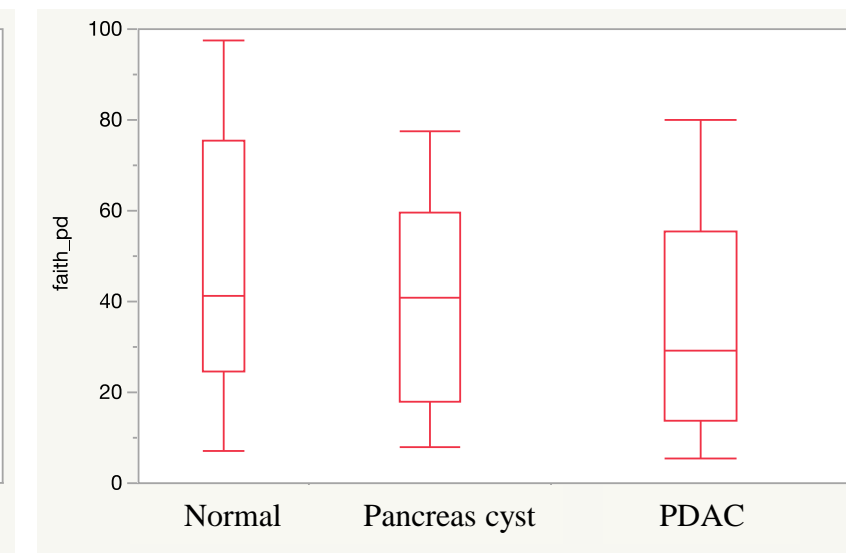

Supplement: NIHMS1646112-supplement-3.pdf [file NIHMS1646112-supplement-3.pdf]
